# Supplementary material for: Solid-phase cloning for high-throughput assembly of single and multiple DNA parts
Source: PubMed Central journal article supplement — Nucleic Acids Res. 2015 Jan 23;43(7):e49. doi: 10.1093/nar/gkv036 (PMC4402512; doi:10.1093/nar/gkv036), 2015-01-23
Supplement: supp_gkv036_nar-02818-met-k-2014-File008.pdf [file supp_gkv036_nar-02818-met-k-2014-File008.pdf]

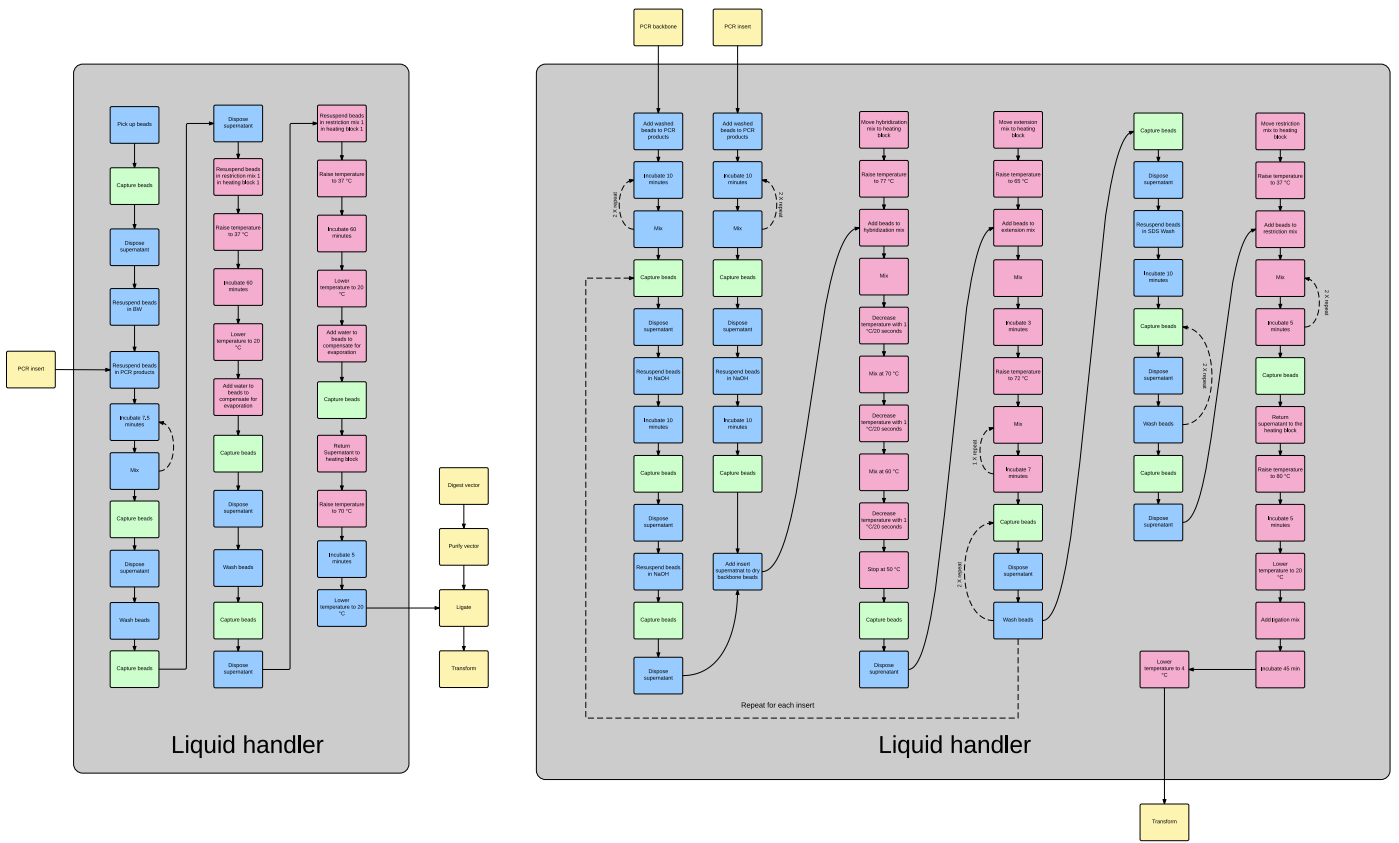

Supplementary figure 1. Detailed view of the unit operations for restriction based (left) and head-to-tail SPC (right). A liquid handler performed operations inside the light grey boxes. Green operations were bead captures, pink operations were carried out on heating block and other operations on the liquid handlers are shown as blue boxes. Yellow operations were done manually.

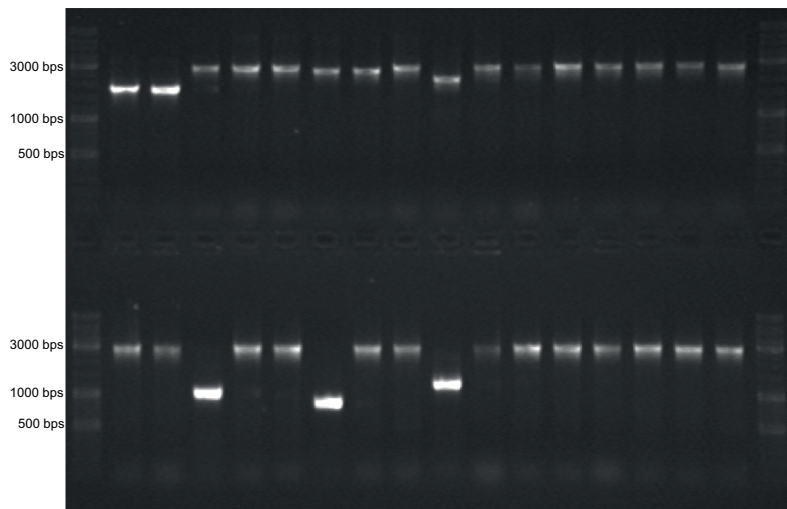

Supplementary figure 2. Comparison head-to-tail SPC and Gibson assembly. The same four DNA fragments were assembled with both head-to-tail SPC (upper row) and Gibson cloning (lower row).

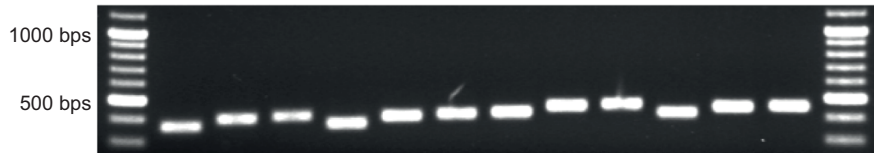

Supplementary figure 3. Bi-specific antibodies. Small affinity proteins were fused to the C-terminal of full-length IgG by 3 different linker lengths. Both the affinity proteins and the linkers were inserted as synthetic oligos.

Supplementary table 1. Detailed view of the DNA sequence near the bead and terminal ends for the applied restriction enzymes. Restriction sites are highlighted in bold font.

NotI Bead---CTCGAG**GCGGCCG**CNNN---assembled construct---NNNG**GCGGCCG**CACGACTC  
 AscI Bead---CTCGAG**GCGGCCG**CNNN---assembled construct---NNNG**GCGGCCG**CCACGACTC  
 NheI Bead---CTCGAG**GCTAGC**NNN---assembled construct---NNNG**GCTAGC**CGACTC  
 EcoRI Bead---CTCGAG**GAATTC**NNN---assembled construct---NNNG**GAATTC**CGACTC  
 BamHI Bead---CTCGAG**GGATCC**NNN---assembled construct---NNNG**GGATCC**ACGACTC  
 BsiWI Bead---CTCGAG**CGTACG**NNN---assembled construct---NNNG**CGTACG**CGACTC  
 AatII Bead---CTCGAG**GACGTC**NNN---assembled construct---NNNG**GACGTC**ATGCAT

Supplementary table 2. Detailed list of constructs assembled with head-to-tail SPC.

| Construct name                                       | Bricks assembled | Backbone brick length (bp) | Insert type | Insert brick 1 length (bp) | Insert 2 brick (bp) | Insert brick 3 (bp) | Total length | Colonies picked per construct | Correct (%) |
|------------------------------------------------------|------------------|----------------------------|-------------|----------------------------|---------------------|---------------------|--------------|-------------------------------|-------------|
| pHis2_GFP11                                          | 2                | 2815                       | Oligo       | 93                         |                     |                     | 2857         | 6                             | 100         |
| pHis2_EGFP                                           | 2                | 2815                       | PCR         | 762                        |                     |                     | 3526         | 12                            | 100         |
| pHis2_mCherry                                        | 2                | 2815                       | PCR         | 753                        |                     |                     | 3517         | 16                            | 71          |
| pHis2_GFP_pZEE                                       | 2                | 257                        | PCR         | 2854                       |                     |                     | 3060         | 48                            | 96          |
| 2180012_2180013pA#8c                                 | 2                | 378                        | PCR         | 5691                       |                     |                     | 6014         | 5                             | 100         |
| 2250322_2250323pA#8c                                 | 2                | 324                        | PCR         | 5548                       |                     |                     | 5819         | 6                             | 100         |
| 3270055_3270054pA#8c                                 | 2                | 225                        | PCR         | 5435                       |                     |                     | 5609         | 9                             | 11          |
| HerceptinCH_pcDNA3.3_HumiraVH                        | 2                | 6424                       | PCR         | 406                        |                     |                     | 6781         | 8                             | 88          |
| HerceptinCH_pcDNA3.3_OmnitargVH                      | 2                | 6424                       | PCR         | 400                        |                     |                     | 6775         | 8                             | 100         |
| HerceptinCL_pOptivec_HumiraVL                        | 2                | 4750                       | PCR         | 384                        |                     |                     | 5050         | 8                             | 100         |
| HerceptinCL_pOptivec_OmnitargVL                      | 2                | 4750                       | PCR         | 384                        |                     |                     | 5050         | 8                             | 100         |
| 96 different single chains to full length antibodies | 2                | 6478 or 4798               | PCR         | 400 or 364                 |                     |                     | 6830 or 5114 | 4                             | 87          |
| 16 variants of failed expression vectors             | 2                | 5075                       | Oligo       | 180                        |                     |                     | 5207         | 4                             | 98          |
| 8 proteins drug tagged with GFP 11                   | 2                | 5549 to 6633               | Oligo       | 90                         |                     |                     | 5627 to 6741 | 12                            | 99          |
| pcDNA3.3_HerceptinH_GFP11                            | 2                | 6847                       | Oligo       | 134                        |                     |                     | 6931         | 8                             | 100         |
| pOptivec_HerceptinH_GFP11                            | 2                | 5134                       | Oligo       | 134                        |                     |                     | 5218         | 8                             | 100         |
| pcDNA3.3_Herceptin_18_Binding protein_GFP11          | 2                | 7066                       | Oligo       | 104                        |                     |                     | 7168         | 8                             | 88          |
| pcDNA3.3_HER2 signal peptide                         | 2                | 5431                       | Oligo       | 111                        |                     |                     | 5491         | 48                            | 35          |
| pHis2_VEGF_EGFP                                      | 3                | 2815                       | PCR         | 393                        | 762                 |                     | 3889         | 6                             | 83          |
| pHis2_VEGF_mCherry                                   | 3                | 2815                       | PCR         | 393                        | 753                 |                     | 3880         | 16                            | 84          |
| pHis2_mCherry_EGFP                                   | 3                | 2815                       | PCR         | 750                        | 762                 |                     | 4246         | 28                            | 79          |
| Bi-specific antibodies                               | 3                | 6847                       | Oligo       | 114                        | 192                 |                     | 7102         | 8**                           | 44**        |
| pHis2_VEGF_AG_mCherry                                | 4                | 2815                       | PCR         | 364                        | 1389                | 753                 | 5239         | 16                            | 81          |
| pHis2                                                | 4                | 1533                       | PCR         | 894                        | 448                 | 757                 | 3535         | 4                             | 75          |
| 2250323pA#8c                                         | 4                | 4126                       | PCR         | 998                        | 527                 | 393                 | 5947         | 4                             | 75          |
| pHis2 (kanamycin)                                    | 4                | 1046                       | PCR         | 998                        | 527                 | 757                 | 3053         | 4                             | 75          |

\*\*With PAGE purified

Supplementary table 3. Estimated importance of assembly properties for selected cloning applications. Up to three plusses were given to a property based on how beneficial it is for the application.

Assembly properties

| Application                                | Multiple inserts | Sequence independent | Synthetic oligo |
|--------------------------------------------|------------------|----------------------|-----------------|
| Fusion proteins                            | +++              | ++                   | +/-             |
| Biosensor                                  | +/-              | +                    | +/-             |
| Expression vectors                         | +/-              | ++                   | +++             |
| Mammalian surface expression               | +/-              | ++                   | +               |
| scFv to full length IgG                    | +/-              | +                    | +/-             |
| Bi-specific proteins with variable linkers | +++              | +++                  | +++             |
| Protein tagging with peptide               | +/-              | ++                   | +++             |
