# Supplementary material for: Solid-phase cloning for high-throughput assembly of single and multiple DNA parts
Source: PubMed Central journal article supplement — Nucleic Acids Res. 2015 Jan 23;43(7):e49. doi: 10.1093/nar/gkv036 (PMC4402512; doi:10.1093/nar/gkv036), 2015-01-23
Supplement: supp_gkv036_nar-02818-met-k-2014-File009.pdf [file supp_gkv036_nar-02818-met-k-2014-File009.pdf]

## Sequences head-to-tail cloning

Primer sequences in bold.

5'-overhangs marked in bold and italic.

### **pHisZ\_GFP11**

Backbone pHisZ:

***CTCGAGGCGGCCGCATAACGCCGGTCGCTACCATTACCAACT***TGTCTGGTGTCAAAAATAATAGGCCT  
ACTAGTCGGCCGTACGGGCCCTTTTCGTCTCGCGCGTTTCGGTGATGACGGTGAAAACCTCTGACACATG  
CAGCTCCCGGAGACGGTCACAGCTTGTCTGTAAGCGGATGCCGGGAGCAGACAAGCCCGTCAGGGCGCG  
TCAGCGGGTGTGGCGGGTGTGGGGCTGGCTTAACTATGCCGCATCAGAGCAGATTGTAAGAGAGTG  
CACCATATGCCGGTGTGAAATACCGCACAGATGCGTAAGGAGAAAATACCGCATCAGGCGGCCCTTAAGGG  
CCTCGTGATACGCCTATTTTTATAGGTTAATGTCATGATAATAATGGTTTCTTAGACGTCAGGTGGCAC  
TTTTCGGGGAAATGTGCGCGGAACCCCTATTTGTTATTTTTCTAAATACATTCAAAATATGTATCCGCT  
CATGAGACAATAACCCTGATAAATGCTTCAATAATATTGAAAAAGGAAGAGTATGAGTATTCAACATT  
TCCGTGTGCGCCTTATCCCTTTTTTTCGGCATTTTTGCCTTCCTGTTTTTGTCCACCCAGAAAACGCTGGT  
GAAAGTAAAAGATGCTGAAGATCAGTTGGGTGCACGAGTGGGTTACATCGAACTGGATCTCAACAGCG  
GTAAGATCCTTGAGAGTTTTGCCCCGAAGAAGCTTTTCCAATGATGAGCACTTTTAAAGTTCTGCTAT  
GTGGCGCGGTATTATCCCGTATTGACGCGGGGAAGAGCAACTCGGTCGCCGCATACACTATTCTCAGA  
ATGACTTGGTTGAGTACTCACCAGTCACAGAAAAGCATCTTACGGATGGCATGACAGTAAGAGAATTA  
TGCAGTGCTGCCATAACCATGAGTGATAACACTGCGGCCAACTTACTTCTGACAACGATCGGAGGACCG  
AAGGAGCTAACCGCTTTTTTGCACAACATGGGGGATCATGTAACCTCGCCTTGATCGTTGGGAACCGGAG  
CTGAATGAAGCCATAACCAAACGACGAGCGTGACACCAGATGCCTGTAGCAATGGCAACAACGTTGCCG  
AAACTATTAAGTGGCGAACTACTTACTTAGCTTCCCGGCAACAATTAATAGACTGGATGGAGGCGGAT  
AAAGTTGCAGGACCACTTCTGCGCTCGGCCCTTCCGGCTGGCTGGTTTATTGCTGATAAATCTGGAGCC  
GGTGAGCGTGGGTCTCGCGGTATCATTGCAGCACTGGGGCCAGATGGTAAGCCCTCCCGTATCGTAGTT  
ATCTACACGACGGGGAGTCAGGCAACTATGGATGAACGAAATAGACAGATCGCTGAGATAGGTGCCTC  
ACTGATTAAGCATTGGTAAGTGTGACAGCAAGTTTACTCATATATACTTTAGATTGATTTAAAACCTTCA  
TTTTTAATTTAAAAGGATCTAGGTGAAGATCCTTTTTGATAATCTCATGACCAAATCCCTTAAAGTGA  
GTTTTCGTTCCACTGAGCGTCAGACCCCGTAGAAAAGATCAAAGGATCTTCTTGAGATCCTTTTTTTTCT  
GCGCGTAATCTGCTGCTTGCAAACAAAAAAACCACCGCTACCAGCGGTGGTTTGTGTTGCCGGATCAAGA  
GCTACCAACTCTTTTTCCGAAGGTAAGTGGCTTTCAGCAGAGCGCAGATACCAAATACTGTCCTTCTAGT  
GTAGCCGTAGTTAGGCCACCCTTCAAGAACTCTGTAGCACCAGCTACATACCTCGCTCTGCTAATCCTG  
TTACCAGTGGCTGCTGCCAGTGGCGATAAGTCGTGCTTACCAGGTTGGACTCAAGACGATAGTTACCG  
GATAAGGCGCAGCGGTGCGGCTGAACGGGGGGTTCGTGCACACAGCCAGCTTGGAGCGAACGACCTAC  
ACCGAACTGAGATACCTACAGCGTGAGCTATGAGAAAGCGCCACGCTTCCCGAAGGGAGAAAGCGCGAC  
AGGTATCCGGTAAGCGGCAGGGTTCGGAACAGGAGAGCGCACGAGGGAGCTTCCAGGGGAAACGCCTG  
GTATCTTTATAGTCTGTGCGGTTTTCGCCACCTCTGACTTGAGCGTCGATTTTTGTGATGCTCGTCAGG  
GGGGCGGAGCCTATGGAAAAACGCCAGCAACGCGGCCCTTTTTACGGTTCCTGGCCTTTTGTGCTGGCCTTT  
TGCTCACATGTTCTTTCTGCGTTATCCCCTGATTTCTGTGGATAACCGTATTACCGCCTTTGAGTGAGC  
TGATACCGCTCGCCGAGCCGAACGACCGAGCGCAGCGAGTCAGTGAGCGAGGAAGCGGAAGAGCGCCC  
AATACGCAAACCGCTCTCCCCGCGGTTGGCCGATTCATTAATGCAGCTGGCAGCAGAGGTTTCCCGAC  
TGGAAGCGGGCAGTGAGCGCAACGCAATTAATGTGAGTTAGCTCACTCATTAGGCACCCAGGCTTTA  
CACTTTATGCTTCCGGCTCGTATGTTGTGTGGAATTGTGAGCGGATAACAATTTACACAGGAAACAGC  
TATGACCATGATTACGCCAAGCTTGCATCATCATCATCATGTAGACAACAATTCACCAAAGAACA  
ACAAAACCGGTTCTATGAGATCTTACATTTACCTAACTTAAACGAAGAACAACGAAACGCCTTCATCCA  
AAGTTTAAAAGATGACCAAGCCAAAGCGCTAACTTGCTAGCAGAAGCTAAAAGCTAAATGATGCTC  
AGGCGCCGAAACAGATCCAATCGGAT***CCCCGGTACCGTTCGCCACCGGTGGATCCGGT***

Insert GFP11 oligo:

CGGGTACCGGTGCCACCGGTGGATCCGGTTCGTGACCACATGGTCCTTCATGAGTACGTAAATGCTGCT  
GGGATTACAGCGGCCGCACGACTC

Restriction enzyme for bead release: NotI

### **pHisZ\_eGFP**

Backbone pHisZ: same as for pHisZ\_GFP11

Insert eGFP:

**CGGGTACCGGTCCGACCGGTGGATCCGGTATGGTGAGCAAGGGCGAGGAGCTGTTACCGGGGTGGT  
GCCCATCCTGGTTCGAGCTGGACGGCGACGTAACCGGCCACAAGTTCAGCGTGTCCGGCGAGGGCGAGGG  
CGATGCCACCTACGGCAAGCTGACCCTGAAGTTCATCTGCACCACCGGCAAGCTGCCCGTGGCCCTGGCCC  
ACCCTCGTGACCACCCTGACCTACGGCGTGCAGTGTTCAGCCGCTACCCCGACCACATGAAGCAGCACG  
ACTTCTTCAAGTCCGCCATGCCCCGAAGGCTACGTCCAGGAGCGCACCATCTTCTTCAAGGACGACGGCA  
ACTACAAGACCCCGCGCCGAGGTGAAGTTCGAGGGCGACACCCTGGTGAACCGCATCGAGCTGAAGGGCA  
TCGACTTCAAGGAGGACGGCAACATCCTGGGGCACAAGCTGGAGTACAACACTACAACAGCCACAACGTCT  
ATATCATGGCCGACAAGCAGAAGAACGGGCATCAAGGTGAACCTCAAGATCCGCCACAACATCGAGGACG  
GCAGCGTGCAGCTCGCCGACCACTACCAGCAGAACACCCCATCGGCGACGGCCCCGTGCTGCTGCCCGA  
CAACCACTACCTGAGCACCCAGTCCGCCCTGAGCAAAGACCCCAACGAGAAGCGCGATCACATGGTCCT  
GCTGGAGTTCGTGACCGCCCGGGATCACTCTCGGCATGGACGAGCTGTACAAGGGCGGCCGACGAC  
TC**

Restriction enzyme for bead release: NotI

### **pHisZ\_mCherry**

Backbone pHisZ: same as for pHisZ\_GFP11

Insert mCherry

**CGGGTACCGGTCCGACCGGTGGATCCGGTATGGTGAGCAAGGGCGAGGAGGATAACATGGCCATCAT  
CAAGGAGTTCATGCGCTTCAAGGTGCACATGGAGGGCTCCGTGAACGGCCACGAGTTCGAGATCGAGGG  
CGAGGGCGAGGGCCGCCCTACGAGGGCACCCAGACCGCCAAGCTGAAGGTGACCAAGGGTGGCCCCCT  
GCCCTTCGCCTGGGACATCCTGTCCCTCAGTTCATGTACGGCTCCAAGGCCTACGTGAAGCACCCCGCC  
GACATCCCCGACTACTTGAAGCTGTCTTCCCCGAGGGCTTCAAGTGGGAGCGCGTGAAGTTCGAG  
GACGGCGGCGTGGTGACCGTGACCCAGGACTCCTCCCTGCAGGACGGCGAGTTCATCTACAAGGTGAAG  
CTGCGCGGACCAACTTCCCTCCGACGGCCCCGTAATGCAGAAGAAGACCATGGGCTGGGAGGCCTCCT  
CCGAGCGGATGTACCCCGAGGACGGCGCCCTGAAGGGCGAGATCAAGCAGAGGCTGAAGCTGAAGGACG  
GCGGCCACTACGACGCTGAGGTCAAGACCACCTACAAGGCCAAGAAGCCCGTGCAGCTGCCCGGCGCCT  
ACAACGTCAACATCAAGTTGGACATCACCTCCACAACGAGGACTACACCATCGTGGAACAGTACGAAC  
GCGCCGAGGGCCGCCACTCCACCGGCGGCATGGACGAGCTGTACAAGGGCGGCCGACGACTC**

Restriction enzyme for bead release: NotI

### **PalkB\_GFP\_pZE**

Backbone AlkS Alcanivorax NC\_008260:

**CTCGAGTCCGACGTCCGCAACAAGACCCCTGTTGCATCTCCTCCAAAGACCTGCGTACTAAGGGATG  
AATGCATATTGATATTATGTACAGAGCAAAAACCTACCCTTTGGAGTAGTTGTTTGGCCTCTATTTCTAG  
CTAACCTACCCTGCCTACAACCTACAACCTCGTCCGCTACCAACATTACGCGGTGTGCGACAGCCTGT  
AGAAACAATCAATATGATAAAAACAAGGTGATCCTAGAATTCATTAAAGAG**

Insert PalkB\_GFP:

**AACAAGGTGATCCTAGAATTCATTAAAGAGGAGAAAGGTACCGCATGCGTAAAGGAGAAGAACCTTT  
TCACTGGAGTTGTCCCAATTCTTGTTGAATTAGATGGTGATGTTAATGGGCACAAATTTTCTGTGCTGAGT  
GAGAGGGTGAAGGTGATGCAACATACGGAAAACCTACCCTTAAATTTATTTGCACTACTGGAAAACCTA  
CCTGTTCCATGGCCAACACTTGTCACTACTTTCCGTTATGGTGTTCATGCTTTGCGAGATAACCAGAT  
CATATGAAAACAGCATGACTTTTTCAAGAGTGCCATGCCCCGAAGGTTATGTACAGGAAAGAACTATATT  
TTTTCAAGATGACGGAACTACAAGACACGTGCTGAAGTCAAGTTTGAAGGTGATACCCTTGTTAATA  
GAATCGAGTTAAAAAGGTATTGATTTTTAAAGAAGATGGAAACATTCTTGGACACAAATTTGGAATACAAC  
TATAACTCACACAATGTATACATCATGGCAGACAAAACAAAAGAATGGAATCAAAGTTAACTTCAAAAT  
TAGACACAACATTGAAGATGGAAGCGTTCAACTAGCAGACCATTATCAACAAAATACTCCAATTGGCG  
ATGGCCCTGTCTTTTTACCAGACAACCATTACCTGTCCACACAATCTGCCCTTTGAAAGATCCCAACGA  
AAAGAGAGACCACATGGTCTTCTTGAGTTTGTAAACAGCTGCTGGGATTACACATGGCATGGATGAACT  
ATACAAAAGGCTGCAGCAAACGACGAAAACCTACGCTGCAGCAGTTTAATAAGCTTGATATCGAATTCC  
TGCAGCCCGGGGATCCCATGGTACGCGTGTAGAGGCATCAAATAAAAACGAAAGGCTCAGTCGAAAGA**

CTGGGCCTTTCGTTTTATCTGTTGTTTGTGCGGTGAACGCTCTCCTGAGTAGGACAAATCCGCCGCCCTA  
GACCTAGGCGTTTCGGCTGCGGCGAGCGGTATCAGCTCACTCAAAGGCGGTAATACGGTTATCCACAGAA  
TCAGGGGATAACGCAGGAAAGAACATGTGAGCAAAAGGCCAGCAAAAGGCCAGGAACCGTAAAAAGGC  
CGCGTTGCTGGCGTTTTTCCATAGGCTCCGCCCCCTGACGAGCATCACAAAAATCGACGCTCAAGTCA  
GAGGTGGCGAAACCCGACAGGACTATAAAGATACCAGGCGTTTCCCCCTGGAAGTCCCTCGTGCGCTC  
TCCTGTTCCGACCCTGCCGCTTACCGGATACCTGTCCGCTTCTCCCTTCGGAAGCGTGCGCTTCT  
CAATGCTCACGCTGTAGGTATCTCAGTTCGGTGTAGGTGCTTCGCTCCAAGCTGGGCTGTGTGCACGAA  
CCCCCGTTCAGCCCGACCCTGCGCCTTATCCGTAACCTATCGTCTTGAGTCCAACCCGGTAAGACAG  
ACTTATCGCCACTGGCAGCAGCCACTGGTAACAGGATTAGCAGAGCGAGGTATGTAGGCGGTGCTACAG  
AGTTCTTGAAGTGGTGGCCTAACTACGGCTACACTAGAAGGACAGTATTTGGTATCTGCGCTCTGCTGA  
AGCCAGTTACCTTCGAAAAAGAGTTGGTAGCTCTTGATCCGGCAAAACAAACCACCGCTGGTAGCGGTG  
GTTTTTTTGTGTTGCAAGCAGCAGATTACGCGCAGAAAAAAGGATCTCAAGAAGATCCTTTGATCTTTT  
CTACGGGGTCTGACGCTCAGTGGAACGAAAACTCACGTTAAGGGATTTTGGTTCATGACTAGTGTGGA  
TTCTCACCAATAAAAAACGCCCGGGCAACCGAGCGTTCTGAACAAATCCAGATGGAGTTCTGAGGTC  
ATTACTGGATCTATCAACAGGAGTCCAAGCGAGCTCTCGAACCCAGAGTCCCCTCAGAAGAACTCGT  
CAAGAAGGCGATAGAAGGCGATGCGCTGCGAATCGGGAGCGGCGATACCGTAAAGCACGAGGAAGCGG  
TCAGCCCATTGCGCGCAAGCTCTTCAGCAATATCACGGGTAGCCAACGCTATGTCTGATAGCGGTCC  
GCCACACCAGCCGGCCACAGTCGATGAATCCAGAAAAGCGGCCATTTTCCACCATGATATTCGGCAAG  
CAGGCATCGCCATGGGTACGACGAGATCCTCGCCGTCGGGCATGCGCGCCTTGAGCCTGGCGAACAGT  
TCGGCTGGCGCGAGCCCCTGATGCTCTTCGTCCAGATCATCTGATCGACAAGACCCGCTTCCATCCGAG  
TACGTGCTCGCTCGATGCGATGTTTCGCTTGGTGGTGAATGGGCAGGTAGCCGGATCAAGCGTATGCA  
GCCGCCGATTGATCAGCCATGATGGATACTTTCTCGGCAGGAGCAAGGTGAGATGACAGGAGATCCT  
GCCCGGCACCTCGCCAATAGCAGCCAGTCCCTTCCCGCTTCAGTGACAACGTCGAGCACAGCTGCGCA  
AGGAACGCCCCTCGTGGCCAGCCACGATAGCCGCGCTGCCTCGTCTGCAGTTCATTCAGGGCACCCGAC  
AGGTGGTCTTGACAAAAAGAACCCGGCGCCCCTGCGCTGACAGCCGGAACACGGCGGCATCAGAGCAG  
CCGATTGTCTGTTGTGCCAGTCATAGCCGAATAGCCTCTCCACCCAAGCGGCCGGAGAACCTGCGTGC  
AATCCATCTTGTCAATGCGAAAACGATCCTCATCTGTCTCTTGATCAGATCTTGATCCCCTGCGCC  
ATCAGATCCTTGGCGGCAAGAAAGCCATCCAGTTTACTTTGCAGGGCTTCCCAACCTTACCAGAGGGCG  
CCCCAGCTGGCAATTCCGACGTCATGCAT

Restriction enzyme for bead release: AatII

## 2180012\_2180013pAff8c

Backbone 2180012:

**CTCGAGGCGGCCGCAACAGCCAGGAAGGGAACACCTTCAAGCTCCAAGAGAGTATAGACCCCTGCAGG  
TGAGGAGACCATGTCCCAACTTCTCCAACCTTAATGCCCGTATGCGAAGCCATTCTTTCTATTTCAGTC  
AATATGAAAGACAAAGGTGGTATAGAAAAGTTGGAAAAGTATTTTTAAAGAAAGTCCCTGAGCCTACA  
CCGGGCTACTAGTTCCCACTCTGTAGCAAAAAGAACCCAAAGCTCCTGCAGCCCCTGCCAACACCTTGCC  
ATTGTTCTGATTCCAGAAGACCATCATCGTGTATAGACATCTATGTCTCTGCTATGGATGAGCTCCAC  
TGTGATATAGGCTCAGGATCGAGCATTGA**

Insert 2180013pAff8c:

**CTGTGATATAGGCTCAGGATCGAGCATTGATTTTTGAGGACATCACCTCCATGGACACTAGATCTTTTT  
CTTCAGACTACACCCACCTCCAGAATGCCAAAACCCCTGGGACTCAGAGCCTCCGATGTACCACACCAT  
TGAGCGTTCCAAAAGTAGCCGCTACCTAGCCACCACGCCCTTTCTTCTAGAAGAGGCTCCCATTGTGAA  
ATCTCATAGCTTTATGTTTTCCCCCTCAAGGAGCTATTATGCCAACTTTGGGGTGCCTGTAAAAACAGC  
AGAATACACAAGTATTACAGACTGTATTGACACAAGGTGTGTCAATGCCCCCAAGCAATTGCGGACAG  
AGCTGCCTTCCCTGGAGGTCTTGAGAGCAAAGTGGAGGACTTAACTTGCTGCCATCCAGAGCGAGAAGC  
AGAAGTGAAGTACCCAGCTCTTAAGGCGCGCCCCACCGCTGAGCAATAACTAGCATAACCCCTTGGGG  
CCTCTAAACGGGTCTTGAGGGGTTTTTTGCTGAAAGGAGGAACTATATCCGGATTGGCGAATGGGACGC  
GCCCTGTAGCGGCGCATTAAAGCGCGCGGGTGTGGTGGTTACGCGCAGCGTGACCGCTACACTTGCCAG  
CGCCCTAGCGCCCCTCCTTTCGCTTCTTCCCTTCTTCTCGCCACGTTGCGCGGCTTTCCCCGTCAAG  
CTCTAAATCGGGGGCTCCCTTTAGGGTTCCGATTTAGTGCTTTACGGCACCTCGACCCCAAAAAAATTG  
ATTAGGGTGTGTTACAGTGGGCTATCGCCCTGATAGACGGTTTTTCGCCCTTTGACGTTGGAGT  
CCACGTTCTTTAATAGTGGACTCTTGTTCCAAACTGGAACAACACTCAACCCTATCTCGGTCTATTCTT  
TTGATTTATAAGGGATTTTGGCGATTTCCGGCCTATTGGTTAAAAAATGAGCTGATTTAACAAAAATTT  
AACCGCAATTTTAAACAAAATATTAACGTTTACAATTTACAGGTGGCACTTTTCCGGGAAATGTGCGCGG  
AACCCCTATTTGTTTATTTTTCTAAATACATTCAAATATGTATCCGCTCATGAATTAATTTAGAAAA**

ACTCATCGAGCATCAAATGAAACTGCAATTTATTCATATCAGGATTATCAATACCATATTTTTGAAAA  
AGCCGTTTCTGTAATGAAGGAGAAAACTCACCGAGGCAGTTCCATAGGATGGCAAGATCCTGGTATCGG  
TCTGCGATTCCGACTCGTCCAACATCAATACAACCTATTAATTTCCCCTCGTCAAAAATAAGGTTATCA  
AGTGAGAAATCACCATGAGTGACGACTGAATCCGGTGAGAATGGCAAAAGTTTATGCATTTCTTTCCA  
GACTTGTTCAACAGGCCAGCCATTACGCTCGTCATCAAAATCACTCGCATCAACCAAACCGTTATTCAT  
TCGTGATTGCGCCTGAGCGAGACGAAATACGCGATCGCTGTTAAAAGGACAATTACAAACAGGAATCG  
AATGCAACCGGCGCAGGAACACTGCCAGCGCATCAACAATATTTTCACCTGAATCAGGATATTTCTCTA  
ATACCTGGAATGCTGTTTTCCCGGGATCGCAGTGGTGAGTAACCATGCATCATCAGGAGTACGGATAA  
AATGCTTGATGGTCGGAAGAGGCATAAATCCGTCAGCCAGTTTAGTCTGACCATCTCATCTGTAACAT  
CATTGGCAACGCTACCTTTGCCATGTTTCAGAAAACAACCTCTGGCGCATCGGGCTTCCCATACAATCGAT  
AGATTGTGCGACCTGATTGCCCGACATTATCGCGAGCCATTTATACCCATATAAATCAGCATCCATGT  
TGGAATTTAATCGCGGCCTAGAGCAAGACGTTTCCCGTTGAATATGGCTCATAACACCCCTTGATTAC  
TGTTTATGTAAGCAGACAGTTTTATTGTTTCATGACCAAAATCCCTAACGTGAGTTTTCGTTCCACTGA  
GCGTCAGACCCCGTAGAAAAGATCAAAGGATCTTCTTGAGATCCTTTTTTTCTGCGCGTAATCTGCTGC  
TTGCAAAACAAAAAACACCGCTACCAGCGGTGGTTTTGTTTGGCGGATCAAGAGCTACCAAACCTTTTTT  
CCGAAGGTAACGGCTTCAGCAGAGCGCAGATACCAAATACTGTCCTTCTAGTGTAGCCGTAGTTAGGC  
CACCACTTCAAGAACTCTGTAGCACCAGCCTACATACCTCGCTCTGCTAATCCTGTTACCAGTGGCTGCTG  
CCAGTGGCGATAAGTCGTGCTTACCAGGTTGGACTCAAGACGATAGTTACCAGGATAAGGCGCAGCGGT  
CGGGCTGAACGGGGGGTTTCGTGCACACAGCCAGCTTGGAGCGAACGACCTACACCGAACTGAGATACC  
TACAGCGTGAGCTATGAGAAAAGCGCCACGCTTCCGAAGGGAGAAAAGGCGGACAGGTATCCGTAAGCG  
GCAGGGTCGGAACAGGAGAGCGCACGAGGGAGCTTCCAGGGGAAACGCCTGGTATCTTTATAGTCTG  
TCGGGTTTCGCCACCTCTGACTTGAGCGTCGATTTTTGTGATGCTCGTCAGGGGGGCGGAGCCTATGGA  
AAAACGCCAGCAACGCGGCTTTTTACGGTTCCTGGCCTTTTGTGGCCTTTTGTCCACATGTTCTTTCC  
TGCGTTATCCCCTGATTCTGTGGATAACCGTATTACCGCCTTTGAGTGAGCTGATACCGCTCGCCGAC  
CCGAACGACCGAGCGCAGCGAGTCAGTGAGCGAGGAAGCGGAAGAGCGCCTGATGCGGTATTTTTCTCT  
TACGCATCTGTGCGGTATTTACACCCGCATATATGGTGACTCAGTACAATCTGATGATGCGGCA  
TAGTTAAGCCAGTATAACACTCCGCTATCGCTACGTGACTGGGTGATGGCTGCGCCCCGACCCCGCCAAC  
ACCCGCTGACGCGCCCTGACGGGCTTGTCTGCTCCCGCATCCGCTTACAGACAAGCTGTGACCGTCTCC  
GGGAGCTGCATGTGTGAGAGTTTTACCGTCATCACCGAAACGCGCGAGGCAGCTGCGGTAAGCTCA  
TCAGCGTGGTCTGTAAGCGATTACAGATGTCTGCTGTTTCATCCGCGTCCAGCTCGTTGAGTTTTCTCC  
AGAAGCGTTAATGTCTGGCTTCTGATAAAGCGGGCCATGTTAAGGGCGTTTTTTTTCTGTTTGGTCACT  
GATGCCTCCGTGTAAGGGGGATTCTGTTTCATGGGGGTAATGATACCGATGAAACGAGAGAGGATGCT  
CACGATACGGGTTACTGATGATGAACATGCCCGTTACTGGAACGTTGTGAGGGTAAACAACCTGGCGGT  
ATGGATGCGGCGGACCAGAGAAAAATCACTCAGGGTCAATGCCAGCGCTTCGTTAATACAGATGTAGG  
TGTTCCACAGGGTAGCCAGCAGCATCCTGCGATGCAGATCCGGAACATAATGGTGCAGGGCGCTGACTT  
CCGCGTTTTCCAGACTTTACGAAACACGGAACCGAAGACCATTTCATGTTGTTGCTCAGGTGCGCAGACGT  
TTTTGCAGCAGCAGTCGCTTACGTTGCTCGCTATCGGTGATTTCATTCTGCTAACAGTAAGGCAACC  
CCGCCAGCCTAGCCGGTCTCAACGACAGGAGCAGCATCATGCGCACCCGTGGGGCCGCCATGCCGGCG  
ATAATGGCCTGCTTCTCGCCGAAACGTTTTGGTGGCGGGACCAGTGACGAAGGCTTGAGCGAGGGCGTGC  
AAGATTCCGAATACCGCAAGCGACAGGCCGATCATCGTCGCGCTCCAGCGAAAGCGGTCTCGCCGAAA  
ATGACCCAGAGCGCTGCCGGCACCTGTCTACGAGTTGCATGATAAAGAAGACAGTCATAAGTGGCGCG  
ACGATAGTCATGCCCCGCGCCACCAGGAGGAGCTGACTGGGTTGAAGGCTCTCAAGGGCATCGGTGGA  
GATCCCGGTGCCTAATGAGTGAGCTAACTTACATTAATTTGCGTTGCGCTCACTGCCCCGTTTTCCAGTCG  
GGAAACCTGTGCTGCCAGCTGCATTAATGAATCGGCCAACGCGCGGGGAGAGGGCGTTTTGCGTATTGGG  
CGCCAGGGTGGTTTTTTCTTTTACCAGTGAGACGGGAACAGCTGATTGCCCTTACCAGCCTGGCCCTG  
AGAGAGTTGCAGCAAGCGTCCACGCTGGTTTTGCCCCAGCAGGCGAAAATCCTGTTTGTGTTGTTAA  
CGGCGGGATATAACATGAGCTGTCTCGGTATCGTCGATCCCACTACCGAGATATCCGCACCAACGCG  
CAGCCCGACTCGGTAATGGCGCGCATTGCGCCAGCGCCATCTGATCGTTGGCAACCAGCATCGCAGT  
GGGAACGATGCCCTCATTACGATTTGCATGGTTTTGTTGAAAACCGGACATGGCACTCCAGTCGCCTTC  
CCGTTCCGCTATCGGCTGAATTTGATTGCGAGTGAGATATTTATGCCAGCCAGCCAGACGCAGACGCGC  
CGAGACAGAACTTAATGGGCCCCGCTAACAGCGCGATTTGCTGGTGACCCAATGCGACCAGATGCTCCAC  
GCCCAGTCGCGTACCGTCTTCATGGGAGAAAATAATACTGTTGATGGGTGTCTGGTCAGAGACATCAAG  
AAATAACGCCGGAACATTAGTGCAGGCAGCTTCCACAGCAATGGCATCCTGGTCATCCAGCGGATAGTT  
AATGATCAGCCACTGACGCGTTGCGCGAGAAGATTGTGCACCGCGCTTTACAGGCTTCGACGCGCT  
TCGTTCTACCATCGACACCACCGCTGGCACCCAGTTGATCGGCGGAGATTTAATCGCCGCGACAAT  
TTGCGACGGCGCTGCAGGGCCAGACTGGAGGTGGCAACGCCAATCAGCAACGACTGTTTGGCCGCGCAG  
TTGTTGTGCCACGCGGTTGGGAATGTAATTCAGCTCCGCCATCGCCGCTTCCACTTTTTCCCGGTTTTCC  
GCAGAAACGTGGCTGGCCTGGTTTACCACGCGGGAAACGGTCTGATAAGAGACACCGGCATACTCTGCG  
ACATCGTATAACGTTACTGGTTTTACATTCACCACCCTGAATTTGACTCTCTTCCGGGCGCTATCATGCC

ATACCGCGAAAGGTTTTGCGCCATTTCGATGGTGTCCGGGATCTCGACGCTCTCCCTTATGCGACTCCTGC  
ATTAGGAAGCAGCCCAGTAGTAGGTTGAGGCCGTTGAGCACCGCCCGCAAGGAATGGTGCATGCAAG  
GAGATGGCGCCCAACAGTCCCCGGCCACGGGGCTGCCACCATACCCACGCCGAAACAAGCGCTCATGA  
GCCCGAAGTGGCGAGCCCGATCTTCCCATCGGTGATGTCCGGCATATAGGCGCCAGCAACCGCACCTG  
TGGCGCCGGTGTATGCCGGCCACGATGCGTCCGGCGTAGAGGATCGAGATCTCGATCCCGCGAAATTAAT  
ACGACTCACTATAGGGGAATTGTGAGCGGATAACAATCCCCCTCTAGAAATAATTTTGTAACTTTAA  
GAAGGAGATATACCATGGGCAGCAGCCATCATCATCATCACAGCAGCGCCTGGTGCCGCGCGCA  
**GCCATATGGCTAGCGCGGCCGACGACTC**

Restriction enzyme for bead release: NotI

### **2250322\_2250323pAff8c**

Backbone 2250322:

**CTCGAGGCGGCCGATATTTGAATTATGGGCCCTACAGTTCCTTATGCACCGCATTATGACTCCACATT**  
TGCAAATATCAGCAAGGATGATTCTGATTTAATCTATTCAACCTATGGGGAAGACTCTGATCTTCCAAG  
TGATTTCAAGCATCCATGAGTTTTTGGCCACGTGCCAAGATTATCCGTATGTCATGGCAGATAGTTACT  
GGATGTTTTAAACAAAAGGAGGGCATTCCAGGACCCTACAAGAGATGGAGATGTCATTGCCTGAAGATG  
AAGGCCATACTAGGACACTTGACACAGCAGGCTCAGGATCGGAGCCACCA

Insert 2250323pAff8c:

**GACACAGCAGGCTCAGGATCGGAGCCACCAGGGCGTTTTGGACTCCAGTACTCAAGACAGGCTCATAGC**  
GCTGAAAGCAGTAAACAAATTTTGGCGTTCAGTTGAAGTTTTTACTCTGAAGAAGCTGAAATATTCC  
AGAAGAACTTGATGAGACCACCAGATTGCTCAGGAACTCCAGGAAGCCCAGAATGAACGTTTGAGC  
ACCAGACCCCTCCGAACATGATCTGTCTCTTGGGTCCCTCATAACAGAGAAATGCATCTTGCTGAACAA  
GTGACCAATAATCTTAAATAAGGCGCGCCACCAGCTGAGCAATAACTAGCATAACCCCTTGGGGCCTC  
TAAACGGGTCTTGAGGGTTTTTGGTGAAGGAGGAACTATATCCGGATTGGCGAATGGGACGCGCCC  
TGTAGCGGCGCATTAAGCGCGGGGTGTGGTGGTTACGCGCAGCGTGACCGCTACACTTGGCAGCGCC  
CTAGCGCCCGCTCCTTTCGCTTCTTCCCTTCTTCTCGCCACGTTTCGCGGCTTTCCCCGTCAAGCTCT  
AAATCGGGGGCTCCCTTTAGGGTTCCGATTTAGTGCTTTACGGCACCTCGACCCCAAAAACTTGATTA  
GGGTGATGGTTCACGTAGTGGCCATCGCCCTGATAGACGGTTTTTTCGCCCTTTGACGTTGGAGTCCAC  
GTTCTTTAATAGTGGACTCTTGTTCAAACTGGAACAACACTCAACCCTATCTCGGTCTATTCTTTTGA  
TTTATAAGGGATTTTGGCGATTTTCGGCCTATTGGTTAAAAAATGAGCTGATTTAACAAAAATTTAACG  
CGAATTTTAAACAAAATATTAACGTTTACAATTTACAGTGGCACTTTTTCGGGAAATGTGCGCGGAACCC  
CTATTTGTTTTATTTTTCTAAATACATTCAAATATGTATCCGCTCATGAATTAATTTCTAGAAAACTCA  
TCAGGATCAAATGAAACTGCAATTTATTCATATCAGGATTATCAATACCATATTTTTGAAAAAGCCGT  
TTCTGTAATGAAGGAGAAAACCTCACCGAGCGAGTTCCATAGGATGGCAAGATCCTGGTATCGGTCTGCG  
ATTCCGACTCGTCCAACATCAATACAACCTATTAATTTCCCCTCGTCAAAAATAAGGTTATCAAGTGAG  
AAATCACCATGAGTGACGACTGAATCCGGTGAGAAATGGCAAAAGTTTATGCATTTCTTTCCAGACTTGT  
TCAACAGGCCAGCCATTACGCTCGTCATCAAAATCACTCGCATCAACCAAACCGTTATTCATTCTGTGAT  
TGCGCCTGAGCGAGACGAAATACGCGATCGCTGTTAAAAGGACAATTACAAACAGGAATCGAATGCAA  
CCGGCGCAGGAACACTGCCAGCGCATCAACAATATTTTACCTGAATCAGGATATTCTTCTAATACCTG  
GAATGCTGTTTTCCCGGGGATCGCAGTGGTGAGTAACCATGCATCATCAGGAGTACGGATAAAATGCTT  
GATGGTCCGAAGAGGCATAAAATCCGTCAGCCAGTTTAGTCTGACCATCTCATCTGTAACATCATTTGGC  
AACGCTACCTTTGCCATGTTTTAGAAACAACCTTGGCGCATCGGGCTTCCATAACAATCGATAGATTGT  
CGCACCTGATTGCCGACATTATCGCGAGCCATTTATACCCATATAAATCAGCATCCATGTTGGAATT  
TAATCGCGGCTAGAGCAAGACGTTTTCCGTTGAATATGGCTCATAACACCCCTTGTATTACTGTTTAT  
GTAAGCAGACAGTTTTTATGTTTCATGACCAAAAATCCCTTAACGTGAGTTTTTCGTTCCACTGAGCGTCAG  
ACCCCGTAGAAAAGATCAAAGGATCTTCTTGAGATCCTTTTTTTCTGCGGTAATCTGCTGCTTGCAAA  
CAAAAAAACACCGCTACCAGCGGTGGTTTTGTTGCGGATCAAGAGCTACCAACTCTTTTTCCGAAGG  
TAACTGGCTTACGAGAGCGCAGATAACAAATACTGTCTTCTAGTGTAGCCGTAGTTAGGCCACCACT  
TCAAGAATCTGTAGCACCGCCTACATACTCGCTCTGCTAATCCTGTTACCAGTGGCTGCTGCCAGTGG  
CGATAAGTCTGTCTTACCAGGTTGGACTCAAGACGATAGTTACCGGATAAGGCGCAGCGTCCGGCTG  
AACGGGGGGTTCGTGCACACAGCCCAGCTTGGAGCGAAGCCTACACCGAACTGAGATACCTACAGCG  
TGAGCTATGAGAAAGCGCCACGCTTCCCGAAGGGAGAAAAGCGGACAGGTATCCGGTAAGCGGCAGGGT  
CGGAACAGGAGAGCGCAGGAGGCTTCCAGGGGAAACGCCTGGTATCTTTATAGTCTGTGCGGTT  
TCGCCACCTCTGACTTGAGCGTGCATTTTTGTGATGCTCGTCAGGGGGGCGGAGCCTATGGAAAAACGC  
CAGCAACGCGGCCCTTTTTACGGTTCTTGGCCTTTTTGCTGACATGTTCTTCCCTGCGTTA  
TCCCCTGATTCTGTGGATAACCGTATTACCGCCTTTGAGTGAGCTGATACCGCTCGCCGAGCCGAACG  
ACCGAGCGCAGCGAGTCAAGTGGAGGAGGAAAGCGGAAGAGCGCCTGATGCGGTATTTTTCTCCTTACGCAT

CTGTGCGGTATTTACACCCGCATATATGGTGCCTCTCAGTACAATCTGCTCTGATGCCGCATAGTTAA  
GCCAGTATACTCCGCTATCGCTACGTGACTGGGTTCATGGCTGCGCCCCGACACCCGCCAACACCCGCT  
GACGCGCCCTGACGGGCTTGTCTGCTCCCGGCATCCGCTTACAGACAAGCTGTGACCGTCTCCGGGAGCT  
GCATGTGTCAGAGGTTTTACCGTCATCACCGAAACGCGCGAGGCAGCTGCGGTAAAGCTCATCAGCGT  
GGTCGTGAAGCGATTACAGATGTCTGCTGTTTCATCCGCGTCCAGCTCGTTGAGTTTTCTCCAGAAGCG  
TTAATGTCTGGCTTCTGATAAAGCGGGCCATGTTAAGGGCGGTTTTTTCCTGTTTGGTCACTGATGCCT  
CCGTGTAAGGGGGATTCTGTTTCATGGGGTAATGATACCGATGAAACGAGAGAGGATGCTCACGATA  
CGGGTTACTGATGATGAACATGCCCGTTACTGGAACGTTGTGAGGGTAAACAACACTGGCGGTATGGAT  
GCGGCGGGACCAGAGAAAAATCACTCAGGGTCAATGCCAGCGCTTCGTTAATACAGATGTAGGTGTTCC  
ACAGGGTAGCCAGCAGCATCCTGCGATGCAGATCCGGAACATAATGGTGCAGGGCGCTGACTTCCGCGT  
TTCCAGACTTTACGAAACACGGAACCGAAGACCATTTCATGTTGTTGCTCAGGTCGCAGACGTTTTGCA  
GCAGCAGTCGCTTACGTTTCGCTCGCGTATCGGTGATTTCATTCTGCTAACAGTAAGGCAACCCCGCCA  
GCCTAGCCGGGTCTCAACGACAGGAGCACGATCATGCGCACCCGTGGGGCCGCTATGCCGGCGATAAT  
GGCCTGCTTCTCGCCGAAACGTTTTGGTGGCGGGACCAGTGACGAAGGCTTGAGCGAGGGCGTGCAAGAT  
TCCGAATACCGCAAGCGACAGGCCGATCATCGTTCGCGCTCCAGCGAAAGCGGTCTCGCCGAAAATGAC  
CCAGAGCGCTGCCGGCACCTGTCTACGAGTTGCATGATAAAGAAGACAGTCATAAGTGCGGCGACGAT  
AGTCATGCCCCGCGCCACCGGAAGGAGCTGACTGGGTTGAAGGCTCTCAAGGGCATCGGTGAGATCC  
CGGTGCCTAATGAGTGAGCTAACTTACATTAATTCGCTTTCGCTCACTGCCCGTTTTCCAGTCGGGAAA  
CCTGTGTCGTCAGCTGCATTAATGAATCGGCCAACGCGCGGGGAGAGGGGTTTTGCGTATTGGGCGCCA  
GGGTGGTTTTTTCTTTTACCAGTGAGACGGGCAACAGCTGATTGCCCTTACCAGCCTGGCCCTGAGAGA  
GTTGCAGCAAGCGGTCCACGCTGGTTTTGCCCCAGCAGGCGAAAATCCTGTTTGATGGTGGTTAACGGCG  
GGATATAACATGAGCTGTCTTCGGTATCGTGCATCCACTACCGAGATATCCGCACCAACGCGCAGCC  
CGGACTCGGTAATGGCGCGCATTGCGCCAGCGCCATCTGATCGTTGGCAACCAGCATCGCAGTGGGAA  
CGATGCCCTCATTACGATTTGCATGGTTTTGTTGAAAACCGGACATGGCACTCCAGTCGCTTCCCGTTCC  
CGCTATCGGCTGAATTTGATTGCGAGTGAGATATTTATGCCAGCCAGCCAGACGACGCGCCGAGAC  
AGAACTTAATGGGCCCCGCTAACAGCGCGATTTGCTGGTGACCCAATGCGACCAGATGCTCCACGCCAG  
TCGCGTACCCTTTCATGGGAGAAAATAATACTGTTGATGGGTGTCTGGTCAGAGACATCAAGAAATA  
ACGCCGGAACATTAGTGCAGGCGAGCTTCCACAGCAATGGCATCCTGGTCATCCAGCGGATAGTTAATGA  
TCAGCCCACTGACGCGTTGCGCGAGAAGATTGTGCACCGCGCTTTACAGGCTTCGACGCGCTTCGTTCC  
TACCATCGACACCACCAGCTGGCACCCAGTTGATCGGCGGAGATTTAATCGCCCGACAATTTGCGA  
CGGCGCGTGCAGGGCCAGACTGGAGGTGGCAACGCCAATCAGCAACGACTGTTTGCCCGCCAGTTGTTG  
TGCCACGCGGTTGGGAATGTAATTCAGCTCCGCCATCGCCGCTTCCACTTTTTCCCGCGTTTTTCGCAGAA  
ACGTGGCTGGCCTGGTTTACCACGCGGGAAACGGTCTGATAAGAGACACCGGCATACTCTGCGACATCG  
TATAACGTTACTGGTTTTACATTACCACCCTGAATTGACTCTCTTCCGGGCGCTATCATGCCATACCGC  
GAAAGGTTTTGCGCCATTTCGATGGTGTCCGGGATCTCGACGCTCTCCCTTATGCGACTCCTGCATTAGG  
AAGCAGCCCAGTAGTAGGTTGAGGCGGTTGAGCACCGCCGCAAGGAATGGTGCATGCAAGGAGATG  
GCGCCAACAGTCCCCCGCCACGGGGCTGCCACCATACCCACGCCGAAACAAGCGCTCATGAGCCCGA  
AGTGGCGAGCCGATCTTCCCATCGGTGATGTGCGGATATAGGCGCCAGCAACCGCACCTGTGGCGC  
CGGTGATGCCGGCCACGATGCGTCCGGCGTAGAGGATCGAGATCTCGATCCCGGAAATTAATACGACT  
CACTATAGGGGAATTTGTGAGCGGATAACAATTTCCCTCTAGAAATAATTTTGTTTAACTTTAAGAAGG  
AGATATACCATGGGACGAGCCATCATCATCATCACAGCAGCGGCTGGTGCCGCGCGGCAGCCAT  
**ATGGCTAGCGGGCCGACGACTC**

Restriction enzyme for bead release: NotI

### **3270055\_3270054pAff8c**

Backbone 3270055

**CTCGAGGCGGCCGACGCGGACGTCAGGAGGTGCGCCGCTTCTGCACCGCGAGCTGGTGCATCCCGAC  
GCCCTCAACCGCTTCGGCAAGACGGCGCTGCAGGTCATGATGTTTGGCAGCACCGCCATCGCCCTGGAGC  
TGCTGAAGCAAGGTGCCAGCCCCAATGTCCAGGACACCTCCGGTACCAGTCCAGTCCATGACGCGGC  
TCAGGATCGTTCTGGAC**

Insert 3270054pAff8c

**CATGACGCGAGGCTCAGGATCGTTCTGGACACCCTGAAGGTCCTAGTGGAGCACGGGGCTGATGTCAA  
CGTGCCTGATGGCACCGGGCACTTCCAATCCATCTGGCAGTTCAAGAGGGTCACACTGCTGTGGTCCAG  
CTTTCTGGCAGCTGAATCTGATCTCCATCGCAGGGACGCCAGGTAAGGCGCGCCCCACCGCTGAGCAAT  
AACTAGCATAACCCCTTGGGGCCTCTAAACGGGTCTTGGGGGTTTTTTGCTGAAAGGAGGAACTATAT  
CCGGATTGGCGAATGGGACGCGCCCTGTAGCGGCGCATTAAAGCGCGGGGTGTGGTGGTTACGCGCAG**

CGTGACCGCTACACTTGCCAGCGCCCTAGCGCCCGCTCCTTTCGCTTCTTCCCTTCTTTCTCGCCAG  
TTCGCCGGCTTTCCCGTCAAGCTCTAAATCGGGGGCTCCCTTTAGGGTTCCGATTTAGTGCTTTACGGC  
ACCTCGACCCCAAAAACTTGATTAGGGTGATGGTTCACGTAGTGGGCCATCGCCCTGATAGACGGTTT  
TTCGCCCTTTGACGTTGGAGTCCACGTTCTTTAATAGTGGACTCTTGTTCCAACTGGAACAACACTCA  
ACCCTATCTCGGTCTATTCTTTTGATTTATAAGGGATTTTGCCGATTTCCGGCTATTGGTTAAAAATG  
AGCTGATTTAACAAAAATTTAACGCGAATTTAACAAAAATTTAACGTTTACAATTTCCAGGTGGCACT  
TTTCGGGGAAATGTGCGCGGAACCCCTATTTGTTTATTTTCTAAATACATTCAAATATGTATCCGCTC  
ATGAATTAATTCTTAGAAAACTCATCGAGCATCAAATGAAACTGCAATTTATTCATATCAGGATTAT  
CAATACCATATTTTTGAAAAAGCCGTTTCTGTAATGAAGGAGAAAACTCACCGAGGCAGTTCCATAGG  
ATGGCAAGATCCTGGTATCGGTCTGCGATTCCGACTCGTCCAACATCAATACAACCTATTAATTTCCCC  
TCGTCAAAAAATAAGGTTATCAAGTGAGAAATCACCATGAGTGACGACTGAATCCGGTGAGAATGGCAA  
AAGTTTATGCATTTCTTTCCAGACTTGTTCAACAGGCCAGCCATTACGCTCGTCATCAAAAATCACTCGC  
ATCAACCAAAACCGTTATTCATTCTGTGATTGCGCCTGAGCGAGACGAAATACGCGATCGCTGTTAAAAGG  
ACAATTACAAAACAGGAATCGAATGCAACCGGCGCAGGAACACTGCCAGCGCATCAACAATATTTTACC  
TGAATCAGGATATTCTTCTAATACCTGGAATGCTGTTTTCCCGGGATCGCAGTGGTGAGTAACCATGC  
ATCATCAGGAGTACGGATAAAATGCTTGATGGTCGGAAGAGGCATAAATTCGGTCAGCCAGTTTAGTCT  
GACCATCTCATCTGTAACATCATTGGCAACGCTACCTTTGCCATGTTTCAGAAAACAACTCTGGCGCATC  
GGGCTTCCATACAATCGATAGATTGTGCGACCTGATTGCCCGACATTATCGCGAGCCCATTTATAACC  
ATATAAATCAGCATCCATGTTGGAATTTAATCGCGCCTAGAGCAAGACGTTTCCCGTTGAATATGGCT  
CATAACACCCCTTGTATTACTGTTTATGTAAGCAGACAGTTTTATTGTTTCATGACCAAAATCCCTAAC  
GTGAGTTTTCGTTCCTGAGCGTCAGACCCCGTAGAAAAGATCAAAGGATCTTCTTGAGATCCTTTTT  
TTCTGCGCGTAATCTGCTGCTTCAAACAAAAAACACCGCTACCAGCGGTGGTTTTGTTTCCCGGATC  
AAGAGCTACCAACTCTTTTTCCGAAGGTAAGTGGCTTCAGCAGAGCGCAGATACCAAATACTGTCTTC  
TAGTGTAGCCGTAGTTAGGCCACCACTTCAAGAACTCTGTAGCACCAGCTACATACCTCGCTCTGCTAA  
TCCTGTTACCAGTGGCTGCTGCCAGTGGCGATAAGTCTGTCTTACCAGGGTTGGACTCAAGACGATAGT  
TACCGGATAAGGCGCAGCGGTCCGGCTGAACGGGGGTTCTGTCACACAGCCCAGCTTGGAGCGAAACGA  
CCTACACCGAAGCTGAGATACCTACAGCGTGAGCTATGAGAAAAGCGCCAGCTTCCCGAAGGGAGAAAGG  
CGGACAGGTATCCGGTAAGCGGCAGGGTCGGAACAGGAGCGCACAGGGGAGCTTCCAGGGGAAAC  
GCCTGGTATCTTTATAGTCTGCTGCGGGTTTCGCCACCTCTGACTTGAGCGTCGATTTTTGTGATGCTCG  
TCAGGGGGGGCGGAGCCTATGGAAAAACGCCAGCAACGGCCCTTTTTACGGTTCTGGCCTTTTTGCTGG  
CCTTTTGCTCACATGTTCTTTCCTGCGTTATCCCTGATTCTGTGGATAACCGTATTACCGCCTTTGAGT  
GAGCTGATACCGCTCGCCGAGCCGAACGACCGAGCGCAGCGAGTCAGTGAGCGAGGAAGCGGAAGAGC  
GCCTGATGCGGTATTTTTCTCCTTACGCATCTGTGCGGTATTTACACCCGCATATATGGTGCCTCTCAG  
TACAATCTGCTCTGATGCCGCATAGTTAAGCCAGTATACACTCCGCTATCGCTACGTGACTGGGTCTAG  
GCTGCGCCCCGACACCCGCCAACACCCGCTGACGCGCCCTGACGGGCTTGCTGCTCCCGGCATCCGCTT  
ACAGACAAGCTGTGACCGTCTCCGGGAGCTGCATGTGTGAGAGGTTTTACCGTCATCACCGAAACGCG  
CGAGGCAGCTGCGGTAAGCTCATCAGCGTGGTCTGAAAGCGATTACAGATGTCTGCTGTTTCATCCG  
CGTCCAGCTCGTTGAGTTTTCTCCAGAAGCGTTAATGTCTGGCTTCTGATAAAGCGGGCCATGTTAAGGG  
CGGTTTTTTCTGTTTGGTCACTGATGCCTCCGTGTAAGGGGATTTCTGTTTCATGGGGTAATGATAC  
CGATGAAACGAGAGAGGATGCTCACGATACGGTTACTGATGATGAACATGCCCGGTTACTGGAACGTT  
GTGAGGGTAAACAACTGGCGGTATGGATGCGGCGGGACCAGAGAAAAATCACTCAGGGTCAATGCCAG  
CGCTTCGTTAATACAGATGTAGGTGTTCCACAGGGTAGCCAGCAGCATCCTGCGATGCAGATCCGGAAC  
ATAATGGTGCAGGGCGCTGACTTCCGCGTTTTCCAGACTTTACGAAACACGGAAACCGAAGACCATTAT  
GTTGTTGCTCAGGTGCGCAGACGTTTTGACAGCAGCAGTCCGTTACGTTCCGCTCGCTATCCGGTATTCA  
TTCTGCTAACAGTAAGGCAACCCCGCCAGCCTAGCCGGTCTCAACGACAGGAGCAGCATCATGCGC  
ACCCGTGGGGCCGATGCCGGCGATAATGGCCTGCTTCTCGCCGAAACGTTTTGGTGGCGGGACCAGTG  
ACGAAGGCTTGAGCGAGGGCGTCAAGATCCGAATACCGCAAGCGACAGGCCGATCATCGTCCGCGCTC  
CAGCGAAAGCGGTCTCGCCGAAAATGACCCAGAGCGCTGCCGGCACCTGTCTACGAGTTGCATGATA  
AAGAAGACAGTCATAAGTGCGGCGACGATAGTCATGCCCGCGCCACCGGAAGGAGCTGACTGGGTTG  
AAGGCTCTCAAGGGCATCGGTGAGATCCCGGTGCCTAATGAGTGAGCTAACTTACATTAATGCGTTG  
CGCTCACTGCCCGCTTCCAGTCCGGAAACCTGTGCTGCCAGCTGCATTAATGAATCGGCCAACCGCGG  
GGGAGAGGCGGTTTTCGTTATTGGGCGCAGGGTGGTTTTTCTTTTACCAGTGAGACGGGCAACAGCTG  
ATTGCCCTTACCCGCTGGCCCTGAGAGAGTTGACGCAAGCGGTCCACGCTGGTTTTGCCCCAGCAGGGC  
AAAATCCTGTTTATGGTGGTTAACGGCGGGATATAACATGAGCTGTCTTCGGTATCGTCTATCCAC  
TACCGAGATATCCGCACCAACGCGCAGCCCGACTCGGTAATGGCGCGCATTGCGCCAGCGCCATCTG  
ATCGTTGGCAACAGCATCGCAGTGGGAACGATGCCCTCATTACAGCATTTGCATGGTTTTGTTGAAAACC  
GGACATGGCACTCCAGTCCGCTTCCCGTTCGGCTATCGGCTGAATTTGATTGCGAGTGAGATATTTATG  
CCAGCCAGCCAGACGCGAGCGCGGAGACAGAACTTAATGGGCCCCGTAACAGCGCGATTTGCTGGTG  
ACCAATGCGACAGATGCTCCACGCCAGTCCGCTTTCATGGGAGAAAATAATACTGTTGAT

GGGTGTCTGGTCAGAGACATCAAGAAATAACGCCGGAACATTAGTGCAGGCAGCTTCCACAGCAATGGC  
ATCCTGGTCATCCAGCGGATAGTTAATGATCAGCCACTGACGCGTTGCGCGAGAAGATTGTGCACCGC  
CGCTTTACAGGCTTCGACGCCGCTTCGTTCTACCATCGACACCACCACGCTGGCACCCAGTTGATCGGGC  
CGAGATTTAATCGCCGCGACAATTTGCGACGGCGCGTGCAGGGCCAGACTGGAGGTGGCAACGCCAATC  
AGCAACGACTGTTTGGCCGCCAGTTGTTGTGCCACGCGGTTGGGAATGTAATTCAGCTCCGCCATCGCC  
GCTTCCACTTTTTCCCGCTTTTCGCAGAAACGTGGCTGGCCTGGTTCACCACGCGGGAAACGGTCTGA  
TAAGAGACACCCGGCATACTCTGCGACATCGTATAACGTTACTGGTTCACATTCACCACCCTGAATTGA  
CTCTCTTCCGGGCGCTATCATGCCATACCCGCGAAAGGTTTTGCGCCATTGATGGTGTCCGGGATCTCG  
ACGCTCTCCCTTATGCGACTCCTGCATTAGGAAGCAGCCAGTAGTAGGTTGAGGCCGTTGAGCACCGC  
CGCCGCAAGGAATGGTGCATGCAAGGAGATGGCGCCAACAGTCCCCCGCCACGGGGCCTGCCACCAT  
ACCCACGCCGAAACAAGCGCTCATGAGCCCGAAGTGGCGAGCCGATCTTCCCCATCGGTGATGTCCGC  
GATATAGGCGCCAGCAACCCGACCTGTGGCGCCGTTGATGCCGGCCACGATGCGTCCGGCGTAGAGGAT  
CGAGATCTCGATCCCGCGAAATTAATACGACTCACTATAGGGGAATTGTGAGCGGATAACAATTTCCCT  
CTAGAAATAATTTGTTAACTTTAAGAAGGAGATATACCATGGGCAGCAGCCATCATCATCATCA  
CAGCAGCGGCCTGGTGGCGCGCGCAGCCATATGGCTAGCGGGCCGACGACTC

Restriction enzyme for bead release: NotI

### HerceptinCH\_pcDNA3.3\_HumiraVH

Backbone HerceptinCH\_pcDNA3.3:

**CTCAGGCTAGCACCAAGGGCCATCGGTCTTCCCCCTGGCACCCCTCCTCAAGAGCACCTCTGGGGG**  
ACAGCGGCCCTGGGCTGCCTGGTCAAGGACTACTTCCCCGAACCGGTGACGGTGTCTGGAACCTCAGGC  
GCCCTGACCAGCGGCGTGCACACCTTCCCGGCTGTCTACAGTCTCAGGACTTACTCCCTCAGCAGCG  
TGGTGACCGTGCCTCCAGCAGCTTGGGCACCCAGACCTACATCTGCAACGTGAATCACAAGCCCAGCA  
ACACCAAGGTGGACAAGAAAGTTGAGCCCAAATCTTGGGACAAAACCTCACACATGCCACCGTGGCCAG  
CACCTGAACTCCTGGGGGACCGTCACTTCTCTTCCCCCAAACCCAAAGGACACCCCTCATGATCTC  
CCGACCCCTGAGGTACATGCGTGGTGGTGGACGTGAGCCACGAAGACCCCTGAGGTCAAGTTCAACTG  
GTACGTGGACGGCGTGGAGGTGCATAATGCCAAGACAAAGCCGCGGGAGGAGCAGTACAACAGCACGT  
ACCGTGTGGTCAAGCTCCTCACCGTCTGCACCAGGACTGGCTGAATGGCAAGGAGTACAAGTGAAGG  
TCTCAAACAAAGCCCTCCAGCCCCATCGAGAAAACCATCTCAAAGCCAAAGGGCAGCCCCGAGAACC  
ACAGGTGTACACCCCTGCCCCATCCCGGGATGAGCTGACCAAGAACCAGGTGAGCCTGACCTGCCTGGTC  
AAAGGCTTCTATCCAGCGACATCGCCGTGGAGTGGGAGAGCAATGGGCAGCCGAGAACAACCTACAAG  
ACCAGCCTCCCGTCTGGACTCCGACGGCTCTTCTCTACAGCAAGCTCACCGTGGACAAGCAGCA  
GTTGGCAGCAGCGGGAACGTCTTCTCATGCTCCGTGATGAGTGCATGAGGCTCTGCACAACCTACAGCAGA  
AGAGCCTCTCCCTGTCCCGGTAATGACTCGAGAAGGGTTCGATCCCTACCGGTTAGTAATGAGTTT  
AAACGGGGGAGGCTAACTGAAACACGGAAGGAGACAATACCGGAAGGAACCCGCGCTATGACGGCAAT  
AAAAAGACAGAATAAAACGCACGGGTGTTGGGTGTTTTGTTTATAAACCGGGGTTCCGGTCCCAGGGCT  
GGCACTCTGTGATAACCCACCGAGACCCATTGGGGCAATACGCCCCGCTTCTTCTTTTCCCCACC  
CCACCCCCAAGTTCGGGTGAAGGCCAGGGCTCGCAGCCAACGTCCGGGCGGCAGGCCCTGCCATAGCA  
GATCTGCGCAGCTGGGGCTCTAGGGGTATCCCCACGCGCCCTGTAGCGGCGCATTAAGCGCGGGGGT  
GTGGTGGTTACGCGCAGCGTGACCGCTACACTTGCCAGCGCCCTAGCGCCCGCTCCTTTCGCTTCTTCC  
CTTCTTTTCTCGCCACGTTCCGGCTTTCCCGTCAAGCTCTAAATCGGGGCATCCCTTTAGGGTTCCG  
ATTTAGTGCTTTACGGCACCTCGACCCAAAAAATTTGATTAGGGTGATGGTTCACGTAGTGGGCCATC  
GCCCTGATAGACGGTTTTTTCGCCCTTTGACGTTGGAGTCCACGTTCTTTAATAGTGGACTCTTGTCCA  
AACTGGAACAACACTCAACCCTATCTCGGTCTATTCTTTTATTATAAGGGATTTTGGGGATTTCCGC  
CTATTGGTTAAAAATGAGCTGATTTAACAAAAATTTAACGCGAATTAATTCTGTGGAATGTGTGTCA  
GTTAGGGTGTGAAAAGTCCCAGGCTCCCAGCAGGCAGAAGTATGCAAAGCATGCATCTCAATTAGTC  
AGCAACCAGGTGTGAAAAGTCCCAGGCTCCCAGCAGGCAGAAGTATGCAAAGCATGCATCTCAATTA  
GTCAGCAACCATAGTCCCGCCCTAACTCCGCCATCCCGCCCTAACTCCGCCAGTTCCGCCATTCTC  
CGCCCCATGGCTGACTAATTTTTTTTTATTTATGAGAGGCCGAGGCCGCTCTGCCTCTGAGCTATTCCA  
GAAGTAGTGAGGAGCTTTTTTGGAGGCTAGGCTTTTGCAAAAAGCTCCCGGGAGCTTGTATATCCAT  
TTTTCGGATCTGATCAAGAGACAGGATGAGGATCGTTTCGCATGATTGAACAAGATGGATTGCACGCAG  
GTTCTCCGGCCGCTTGGGTGGAGAGGCTATTCGGCTATGACTGGGCACAACAGACAATCGGCTGCTCTG  
ATGCCGCGTGTTCGGCTGTGAGCGCAGGGGCGCCGGTCTTTTTGTCAAGACCGACCTGTCCGGTGC  
CCTGAATGAACTGCAGGACGAGGCAGCGCGCTATCGTGGCTGGCCACGACGGGGCTTCCCTTGGCGAGC  
TGTGCTCGACGTTGTCACTGAAGCGGGAAGGACTGGCTGCTATTGGGCGAAGTCCCGGGCAGGATCT  
CCTGTCATCTCACCTTGCTCCTGCCGAGAAAGTATCCATCATGGCTGATGCAATGCGGGCGCTGCATAC  
GCTTGATCCGGCTACCTGCCATTTCGACCACCAAGCGAAACATCGCATCGAGCGAGCACGTAATCGGAT



GGAAGCCGGTCTTGTGCGATCAGGATGATCTGGACGAAGAGCATCAGGGGCTCGCGCCAGCCGAACTGTT  
CGCCAGGCTCAAGGCGCGCATGCCCCGACGGCGAGGATCTCGTCTGACCCATGGCGATGCCTGCTTGCCG  
AATATCATGGTGGAAAATGGCCGCTTTTCTGGATTTCATCGACTGTGGCCGGCTGGGTGTGGCGGACCGC  
TATCAGGACATAGCGTTGGCTACCCGTGATATTGCTGAAGAGCTTGGCGGCGAATGGGCTGACCGCTTC  
CTCGTGTCTTACGGTATCGCCGCTCCCGATTTCGACGCGCATCGCCTTCTATCGCCTTCTTGACGAGTTCT  
TCTGAGCGGGACTCTGGGGTTCGCGAAATGACCGACCAAGCGACGCCAACCTGCCATCACGAGATTTTC  
GATTCACCGCCGCTTCTATGAAAGGTTGGGCTTCGGAATCGTTTTCCGGGACGCGGGCTGGATGATC  
CTCCAGCGCGGGGATCTCATGCTGGAGTTCTTCGCCCACCCCAACTTGTTTTATTGCAGCTTATAATGGT  
TACAAATAAAGCAATAGCATCACAAATTCACAAATAAAGCATTTTTTTACTGCATTCTAGTTGTGGT  
TTGTCCAAACTCATCAATGTATCTTATCATGTCTGTATACCGTCGACCTCTAGCTAGAGCTTGGCGTAA  
TCATGGTCATAGCTGTTTCTGTGTGAAATTTGTTATCCGCTCACAATTCACACAACATACGAGCCGGA  
AGCATAAAGTGTAAGCCTGGGGTGCCTAATGAGTGAGCTAACTCACATTAATTGCGTTGCGCTCACTG  
CCCCTTTCCAGTCGGGAAACCTGTCTGTGCCAGCTGCATTAATGAATCGGCCAACGCGCGGGGAGAGGC  
GGTTTGGCTATTGGGCGCTCTTCCGCTTCCCTCGCTCACTGACTCGCTGCGCTCGGTCTGGTCTGCGGC  
GAGCGGTATCAGCTCAAAAGGCGGTAATACGGTTATCCACAGAATCAGGGGATAACGCAGGAAAG  
AACATGTGAGCAAAAAGGCCAGCAAAAAGGCCAGGAACCGTAAAAAGGCCGCGTTGCTGGCGTTTTTCCAT  
AGGCTCCGCCCCCTGACGAGCATCACAAAATCGACGCTCAAGTCAGAGGTGGCGAAACCCGACAGGA  
CTATAAAGATACCAGGCGTTTCCCCTGGAAGCTCCCTCGTGCCTCTCCTGTTCCGACCTGCGGCTTA  
CCGATACCTGTCCGCTTTCTCCCTTCGGGAAGCGTGGCGCTTTCTCAATGCTCACGCTGTAGGTATCT  
CAGTTCGGTGTAGGTCGTTTCGCTCCAAGCTGGGCTGTGTGCACGAACCCCGTTACGCCACTGGCAGCAGCC  
GCCTTATCCGGTAACTATCGTCTTGAGTCCAACCCGGTAAGACACGACTTATCGCCACTGGCAGCAGCC  
ACTGGTAACAGGATTAGCAGAGCGAGGTATGTAGGCGGTGCTACAGAGTTCTTGAAGTGGTGGCCTAA  
CTACGGCTACACTAGAAGGACAGTATTTGGTATCTGCGCTCTGCTGAAGCCAGTTACCTTCGGAAAAAG  
AGTTGGTAGCTCTTGATCCGGCAAACAAACCACCGCTGGTAGCGGTGGTTTTTTTGTGTTGCAAGCAGCA  
GATTACGCGCAGAAAAAAGGATCTCAAGAAGATCTTTGATCTTTTCTACGGGGTCTGACGCTCAGTG  
GAACGAAAAACTCAGCTTAAGGATTTTGGTCATGAGATTATCAAAAAGGATCTTACCTAGATCTTTTT  
AAATTAATAAAGTGAAGTTTTAAATCAATCTAAAGTATATATGAGTAAACTTGGTCTGACAGTTACCAAT  
GCTTAATCAGTAGGACCTATCTCAGCGATCTGTCTATTTTCGTTTCATCCATAGTTGCTGACTCCCCGT  
CGTGTAGATAACTACGATACGGGAGGGCTTACCATCTGGCCCCAGTGCTGCAATGATACCGCGAGACCC  
ACGCTCACCGGCTCCAGATTTATCAGCAATAAACACAGCCAGCCGGAAGGGCCGAGCGCAGAAGTGGTCC  
TGCAACTTTATCCGCTCCATCCAGTCTATTAATTTGTTGCCGGGAAGCTAGAGTAAGTAGTTCCGCCAGT  
TAATAGTTTTGCGCAACGTTGTTGCCATTGCTACAGGCATCGTGGTGTACGCTCGTCTGTTTGGTATGGC  
TTCATTACAGCTCCGGTTCCTCAACGATCAAGGCGAGTTACATGATCCCCATGTTGTGCAAAAAAGCGGT  
TAGCTCCTTCGGTCTCCGATCGTTGTGAGAAGTAAGTTGGCCGAGTGTATCACTCATGGTTATGGC  
AGCACTGCATAATTCTCTTACTGTATGCCATCCGTAAGATGCTTTTTCTGTGACTGGTGAGTACTCAAC  
CAAGTCATTCTGAGAATAGTGTATGCGGCGACCGAGTTGCTCTTGGCCGGCGTCAATACGGGATAATAC  
CGCGCCACATAGCAGAACTTTAAAAGTGCTCATCATTGGAACCGTTCTTCCGGGGCGAAAACCTCAAG  
GATCTTACCCTGTTGAGATCCAGTTCGATGTAACCCACTCGTGCACCCAACTGATCTTTCAGCATCTTT  
TACTTTACCAGCGTTTTCTGGGTGAGCAAAAACAGGAAGGCAAAAATGCCGCAAAAAGGGAATAAGGG  
CGACACGGAATGTTGAATACTCATACTCTTCTTTTTCAATATTATTGAAGCATTATCAGGGTTATT  
GTCTCATGAGCGGATACATATTTGAATGTATTTAGAAAAATAAACAAATAGGGGTTCCGCGCACATTT  
CCCCGAAAAGTGCCACCTGACGTGACGGATCGGGAGATCTCCCGATCCCCTATGGTTCGACTCTCAGTAC  
AATCTGCTCTGATGCCGCATAGTTAAGCCAGTATCTGCTCCCTGCTTGTGTGTTGGAGGTGCTGAGTA  
GTGCGCGAGCAAAATTTAAGCTACAACAAGGCAAGGCTTGACCGACAATTGCATGAAGAATCTGCTTA  
GGGTTAGGCGTTTTTGGCTGCTTCGCGATGTACGGGCCAGATATACGCGTTGACATTGATTATTGACTA  
GTTATTAATAGTAATCAATTACGGGGTCAATTAGTTCATAGCCCATATATGGAGTTCCGCGTTACATAAC  
TTACGGTAAATGGCCCGCTGGCTGACCGCCAACGACCCCGCCATTGACGTCAATAATGACGTATG  
TTCCCATAGTAACGCCAATAGGGACTTTCCATTGACGTCAATGGGTGGAGTATTTACGGTAAACTGCC  
ACTTGGCAGTACATCAAGTGTATCATATGCCAAGTACGCCCCCTATTGACGTCAATGACGGTAAATGGC  
CCGCTGGCATTATGCCAGTACATGACCTTATGGGACTTTCTACTTGGCAGTACATCTACGTATTAG  
TCATCGCTATTACCATGGTGTATGCGTTTTTGGCAGTACATCAATGGGCGTGGATAGCGGTTTACTCAC  
GGGATTTCCAAGTCTCCACCCATTGACGTCAATGGGAGTTTTGTTTTGGCACAAAATCAACGGGACT  
TTCCAAAATGTGTAACAACCTCCGCCCCATTGACGCAAAATGGGCGGTAGGCGTGTACGGTGGGAGGTCT  
ATATAAGCAGAGCTCGTTTGTGTAACCGTCAGATCGCCTGGAGACGCCATCCACGCTGTTTTGACCTCC  
ATAGAAGACACCGGGACCGATCCAGCCTCCGGACTCTAGAGGATCGAACCTT

Insert HumiraVH

**CAGCTCCGGACTCTAGAGGATCGAACCTTGAGGTACAGCTGGTTGAATCCGGTGGTGGACTGGTCC**  
**AACCTGGGAGAAGCCTGAGACTGAGCTGTGCAGCATCAGGGTTTACGTTTCGATGACTACCGGATGCATT**

GGGTGCGTCAGGCTCCAGGAAAAGGGCTGGAATGGGTAGTGCCATCACATGGAATAGCGGCCACATCG  
ACTATGCCGATTTCAGTGGAAGGCCGGTTCACCATTTCCAGGGACAATGCCAAGAAGTCCCTGTATCTCC  
AGATGAACAGCCTTAGAGCCGAGGATACTGCAGTGTACTACTGCGCCAAGGTCAGCTACCTGAGCACAG  
CCAGTAGCCTCGACTATTGGGGCCAAGGCACATTGGTGACTGTGAGTTCGGCTAGCCGACTC

Restriction enzyme for bead release: NheI

### **HerceptinCH\_pcDNA3.3\_OmnitargVH**

Backbone HerceptinCH\_pcDNA3.3: Same as for HerceptinCH\_pcDNA3.3\_HumiraVH

Insert OmnitargVH:

**CAGCCTCCGACTCTAGAGGATCGAACCCCTTGAGGTGCAACTGGTTCGAAAGTGGCGGAGGACTCGTGC**  
AGCCAGGAGGTTCTCTGCGACTGAGTTGTGCCGCTTCTGGCTTTACTTTACCGACTATAACGATGGATT  
GGGTGAGACAGGCTCCCGGAAAGGCCTCGAATGGGTAGCTGACGTCAACCCTAATTCAGGCGGGTCAA  
TCTACAATCAGAGGTTTAAAGGCCGTTTACCTTGAGCGTGGATCGCAGCAAGAACACACTCTATCTGC  
AGATGAACAGCCTTAGAGCCGAAGATACTGCAGTCTATTACTGTGCCAGGAATCTGGGGCCAAGCTTCT  
ACTTCGACTATTGGGGACAAGGCACCCCTGGTTACGGTGTCTCTGCTAGCCGACTC

Restriction enzyme for bead release: NheI

### **HerceptinCL\_pOptivec\_HumiraVL**

Backbone - HerceptinCL\_pOptivec

**CTCGAGCGTACGGTGGCTGCACCATCTGTCTTCATCTTCCCGCCATCTGATGAGCAGTTGAAATCTGG**  
AACTGCCTCTGTTGTGTGCCTGCTGAATAACTTCTATCCCAGAGAGGCCAAAAGTACAGTGGAAGGTGGA  
TAACGCCCTCCAATCGGGTAACTCCCAGGAGAGTGTACAGAGCAGGACAGCAAGGACAGCACCTACAG  
CCTCAGCAGCACCTGACGCTGAGCAAAGCAGACTACGAGAAAACAAAAGTCTACGCCTGCGAAGTCAC  
CCATCAGGGCCTGAGTTCGCCCCTCACAAAGAGCTTCAACAGGGGAGAGTGTTAACTCGAGAAGGGTTG  
GATCCCTACCGGTGCTGCGGCCGCGCAGTTAACGCCGCCCTCTCCCTCCCCCCCCCTAACGTTACTGG  
CCGAAGCCGCTTGAATAAAGGCCGGTGTGCGTTTGTCTATATGTTATTTTCCACCATATTGCCGTCTTT  
TGGCAATGTGAGGGCCCGGAAACCTGGCCCTGTCTTGTGACGAGCATTCTAGGGGTCTTTCCCCTCTC  
GCCAAAGGAATGCAAGGTCTGTTGAATGTCGTGAAGGAAGCAGTTCCTCTGGAAGCTTCTTGAAGACA  
AACAACGTCTGTAGCGACCCCTTTCAGGCAGCGGAACCCCCACCTGGCGACAGGTGCCTCTGCGGCCA  
AAAGCCACGTGTATAAGATACACTGCAAAGGCCGCAACCCAGTGCCACGTTGTGAGTTGGATAGT  
TGTGGAAGAGTCAAATGGCTCTCTCAAGCGTATTCACAAGGGGTGAAGGATGCCCAGAAGGTACC  
CCATTGTATGGGATCTGATCTGGGGCCTCGGTACACATGCTTTACATGTGTTTGTAGTCGAGGTTAAAAA  
ACGTCTAGGCCCCCGAACCACGGGGACGTGGTTTTCTTTGAAAAACACGATGATAATATGGCCACAA  
GATCTGCCACCATGGTTCGACCATTGAACTGCATCGTCGCCGTGTCCAAAATATGGGGATTGGCAAGA  
ACGGAGACCTACCCTGGCCTCCGCTCAGGAACGAGTTCAGTACTTCAAAGAATGACCACAACCTCTT  
CAGTGGAAGTAAACAGAATCTGGTGATTATGGGTAGGAAAACCTGGTTCTCCATTCTGAGAAGAAT  
CGACTTTTAAAGGACAGAATTAATATAGTTCTCAGTAGAGAACTCAAAGAACCACCAGGAGGCTCAT  
TTTCTTGCCAAAAGTTTGGATGATGCCTTAAAGACTTATTGAACAACCGGAATTGGCAAGTAAAGTAGA  
CATGGTTTTGGATAGTCGGAGGCAGTCTGTTTACCAGGAAGCCATGAATCAACCAGGCCACCTCAGACT  
CTTTGTGACAAGGATCATGCAGGAATTTGAAAGTGACACGTTTTTCCAGAAATTGATTTGGGGAAAT  
ATAAACTTCTCCAGAATACCCAGGCGTCTCTCTGAGGTCCAGGAGGAAAAAGGCATCAAGTATAAGT  
TTGAAGTCTACGAGAAGAAAGACTAAAACCGGTTAGTAATGAGTTTAAACGGGGGAGGCTAACTGAAA  
CACGGAAGGAGACAATACCGGAAGGAACCCGCGCTATGACGGCAATAAAAAGACAGAATAAAACGCAC  
GGGTGTTGGGTCGTTTGTTCATAAACCGGGGTTCCGGTCCCAGGGCTGGCACTCTGTGATACCCACC  
GAGACCCATTGGGGCCAATACGCCCGCTTTCTTCTTTTCCCCACCCACCCCAAGTTCGGGTGAA  
GGCCAGGGCTCGCAGCCAACGTCGGGGCGGCAGGCCCTGCCATTACCGTCGACCTCTAGCTAGAGCTTG  
GCGTAATCATGGTCATAGCTGTTTCTGTGTGAAATTTGTTATCCGCTCACAATTCACACAACATACGA  
GCCGGAAGCATAAAGTGTAAGCCTGGGGTGCCTAATGAGTGAGCTAACTCACATTAATTGCGTTGCGC  
TCACTGCCCGCTTTCCAGTCGGGAAACCTGTCGTGCCAGCTGCATTAATGAATCGGCCAACGCGGGG  
AGAGGCGTTTTGCGTATTGGGCGCTTTCGCTTCTCGCTCACTGACTCGCTGCGCTCGGTGCTTCCGC  
TGCGGCGAGCGGTATCAGCTCACTCAAAGGCGGTAATACGGTTATCCACAGAATCAGGGGATAACGCAG  
GAAAGAACATGTGAGCAAAAGGCCAGCAAAAGGCCAGGAACCGTAAAAAGGCCGCTTGTGGCGTTT  
TTCCATAGGCTCCGCCCCCTGACGAGCATCACAAAATCGACGCTCAAGTCAGAGGTGGCGAAACCCG  
ACAGGACTATAAAGATACCAGGCGTTTCCCCTGGAAGCTCCCTCGTGCGCTCTCTGTTCCGACCCTGC

CGCTTACCGGATACCTGTCCGCTTTCTCCCTTCGGGAAGCGTGGCGCTTTCTCATAGCTCACGCTGTAG  
GTATCTCAGTTCGGTGTAGGTCGTTTCGCTCCAAGCTGGGCTGTGTGCACGAACCCCGTTCAGCCCGAC  
CGCTGCGCTTATCCGGTAACTATCGTCTTGAGTCCAACCCGGTAAGACACGACTTATCGCCACTGGCA  
GCAGCCACTGGTAACAGGATTAGCAGAGCGAGGTATGTAGGCGGTGCTACAGAGTCTTGAAGTGGTG  
GCCTAACTACGGCTACACTAGAAGAACAGTATTTGGTATCTGCGCTCTGCTGAAGCCAGTTACCTTCGG  
AAAAAGAGTTGGTAGCTCTTGATCCGGCAAACAAACCACCGCTGGTAGCGGTTTTTTTTGTTTGCAAGCA  
GCAGATTACGCGCAGAAAAAAGGATCTCAAGAAGATCCTTTGATCTTTTCTACGGGGTCTGACGCTCA  
GTGGAACGAAAACCTCACGTTAAGGGATTTTGGTCATGAGATTATCAAAAAGGATCTTCACCTAGATCC  
TTTTAAATTAATAAATGAAGTTTTAAATCAATCTAAAGTATATATGAGTAAACTTTGGTCTGACAGTTAC  
CAATGCTTAATCAGTGAGGCACCTATCTCAGCGATCTGTCTATTTTCGTTTCATCCATAGTTGCCTGACTC  
CCCCTCGTGTAGATAACTACGATACGGGAGGGCTTACCATCTGGCCCCAGTGTGCAATGATACCGCGA  
GACCCACGCTCACCGGCTCCAGATTTATCAGCAATAAACCCAGCCAGCCGGAAGGGCCGAGCGCAGAAGT  
GGTCTGCAACTTTATCCGCTCCATCCAGTCTATTAATTGTTGCCGGGAAGCTAGAGTAAAGTAGTTTCG  
CCAGTTAATAGTTTTCGCAACGTTGTTGCCATTGCTACAGGCATCGTGGTGTACGCTCGTCTGTTGGT  
ATGGCTTCATTACGCTCCGTTTCCCAACGATCAAGGCGAGTTACATGATCCCCATGTTGTGCAAAAAA  
GCGGTTAGCTCCTTCGGTCTCCGATCGTTGTCAGAAGTAAGTTGGCCGAGTGTATCACTCATGGTT  
ATGGCAGCACTGCATAATTCTCTTACTGTCATGCCATCCGTAAGATGCTTTTCTGTGACTGGTGTAGTAC  
TCAACCAAGTCATTCTGAGAATAGTGTATGCGGCGACCGAGTTGCTCTTGCCCGGCGTCAATACGGGAT  
AATACCGCGCCACATAGCAGAACTTTAAAAGTGCTCATCATTGAAAACGTTCTTCGGGGCGAAAACCTC  
TCAAGGATCTTACCGCTGTTGAGATCCAGTTCGATGTAACCCACTCGTGCACCCAACTGATCTTCAGCA  
TCTTTTACTTTTACCAGCGTTTCTGGGTGAGCAAAAACAGGAAGGCAAAAATGCCGCAAAAAAGGGAAT  
AAGGGCGACACGGAAATGTTGAATACTCATACTCTTCTTTTCAATATTTAAGCATTATCAGGG  
TTATTGTCTCATGAGCGGATACATATTTGAATGTATTTAGAAAAATAAACAAATAGGGGTTCCGCGCA  
CATTTCCCGAAAAGTGCCACCTGACGTCGACGGATCGGGAGATCAGTTGACATTGATTATTGACTAGT  
TATTAATAGTAATCAATTACGGGGTCATTAGTTCATAGCCCATATATGGAGTTCGCGGTTACATAACTT  
ACGGTAAATGGCCCGCTGGCTGACCGCCCAACGACCCCGCCCATTTGACGTCAATAATGACGTATGTT  
CCCATAGTAACGCCAATAGGGACTTTCCATTGACGTCAATGGGTGGAGTATTTACGGTAAACTGCCAC  
TTGGCAGTACATCAAGTGTATCATATGCCAAGTACGCCCCCTATTGACGTCAATGACGGTAAATGGCCC  
GCCTGGCATTATGCCAGTACATGACCTTATGGGACTTTCTACTTGGCAGTACATCTACGTATTAGTC  
ATCGCTATTACCATGGTGATGCGGTTTTGGCAGTACATCAATGGGCGTGGATAGCGGTTTACTCACGG  
GGATTTCCAAGTCTCCACCCCATTTGACGTCAATGGGAGTTTTGTTTTGGCACAAAATCAACGGGACTTT  
CCAAAATGTCGTAACAACTCCGCCCCATTGACGCAAAATGGGCGGTAGGCGTGTACGGTGGGAGGTCTAT  
ATAAGCAGAGCTCGTTTTAGTGAACCGTCAGATCGCCTGGAGACGCCATCCACGCTGTTTTGACCTCCAT  
AGAAGACACCGGGACCGATCCAGCCT**CCGGACTCTAGAGGATCCAACCCTT**

Insert HumiraVL:

**AGCCTCCGGACTCTAGAGGATCCAACCCTTGACATCCAGATGACACAGTCTCCCTCTTCTCTGAGCGCT**  
AGCGTCGGGGATCGCGTGACCATTACGTGTAGGGCCTCCAGGGGATTTCGCAACTACCTCGCGTGGTAT  
CAGCAGAAGCCTGGGAAAGCTCCAAGCTCTTGATCTATGCCGCTTCTACTCTGCAATCTGGCGTTCCC  
AGTCGGTTTTTCCGGATCAGGCTCAGGAACCGATTTCACTCTGACCATATCCAGCCTTCAGCCAGAGGAC  
GTAGCAACATACTACTGCCAGAGGTATAATCGAGCTCCGTACACCTTTGGCCAAGGGACCAAAGTGGGA  
**GATAAAGCGTACGCGACTC**

Restriction enzyme for bead release: BsiWI

## **HerceptinCL\_pOptivec\_OmnitargVL**

Backbone HerceptinCL\_pOptivec: Same as for HerceptinCL\_pOptivec\_HumiraVL

Insert OmnitargVL:

**CAGCTCCGGACTCTAGAGGATCCAACCCTTGACATCCAGATGACACAGAGCCCTTCTAGCTTGTCCGC**  
AAGTGTCCGAGATCGCGTAACCATTACTTGCAAAGCGAGTCAGGATGTGAGCATTGGCGTTGCTTGGTA  
TCAGCAGAAAACCCGGGAAAGCCCTAAGCTGCTGATATACTCCGCAAGCTACCGGTATACAGGTGTTCC  
ATCCCGTTTTTTCAGGGTCCGGATCTGGGACTGACTTCACACTGACTATTAGCTCCCTTCAGCCCGAGGA  
CTTTGCCACCTACTATTGCCAGCAATACTACATCTACCCGTATACCTTCGGGCAAGGGACCAAAGTGG  
**AGATCAAGCGTACGCGACTC**

Restriction enzyme for bead release: NheI

## pcDNA3.3\_HER2 signal peptide

Backbone pcDNA3.3:

**CTCAGAGGCGCGCCATAACCCTACCGGTTAGTAATGAGTTTAAACGGGGGAGGCTAACTGAAACACG**  
GAAGGAGACAATACCGGAAGGAACCCGCGCTATGACGGCAATAAAAAGACAGAATAAAACGCACGGGT  
GTTGGGTGTTTTGTTTCATAAACCGGGGTTTCGGTCCCAGGGCTGGCACTCTGTGATAACCCACCGAGA  
CCCCATTGGGGCCAATACGCCCGCTTTCTTCCTTTTCCCCACCCACCCCAAGTTCGGGTGAAGGCC  
CAGGGCTCGCAGCCAACGTGGGGCGGCAGGCCCTGCCATAGCAGATCTGCGCAGCTGGGGCTCTAGGG  
GGTATCCCCACGCGCCCTGTAGCGGCGCATTAAAGCGCGGCGGGTGTGGTGGTTACGCGCAGCGTGACCG  
CTACACTTGCCAGCGCCCTAGCGCCCGCTCCTTTTCGCTTTCTTCCCTTCTTTCTCGCCACGTTCCGCCGC  
TTTTCCCGTCAAGCTCTAAATCGGGGCATCCCTTTAGGGTTCGATTTAGTGCTTTACGGCACCTCGACC  
CCAAAAAAGTTGATTAGGGTGATGGTTCACGTAGTGGGCCATCGCCCTGATAGACGGTTTTTTCGCCCTT  
TGACGTTGGAGTCCACGTTCTTTAATAGTGGACTCTTGTTCCAAACTGGAACAACACTCAACCCTATCT  
CGGTCTATTCTTTTATTATAAGGGATTTTGGGGATTTCCGCCCTATTGGTTAAAAAATGAGCTGATTT  
AACAAAAATTTAACGCGAATTAATTCTGTGGAATGTGTGTCAGTTAGGGTGTGGAAAGTCCCCAGGCT  
CCCCAGCAGGCAGAAGTATGCAAAGCATGCATCTCAATTAGTCAGCAACCAGGTGTGGAAAGTCCCCAG  
GCTCCCCAGCAGGCAGAAGTATGCAAAGCATGCATCTCAATTAGTCAGCAACCATAGTCCCGCCCTAA  
CTCCGCCCATCCCGCCCTAACTCCGCCAGTTCCGCCCATTTCTCCGCCCATGGCTGACTAATTTTTTTT  
TATTTATGCAGAGGCCGAGGCCGCTCTGCCTCTGAGCTATTCCAGAAGTAGTGAGGAGGCTTTTTTTGG  
AGGCTAGGCTTTTGAAAAAGTCCCGGGAGCTTGTATATCCATTTTCGGATCTGATCAAGAGACAGG  
ATGAGGATCGTTTTGCGATGATTGAACAAGATGGATTGCACGCAGGTTCTCCGGCCGCTTGGGTGGAGAG  
GCTATTCCGGCTATGACTGGGCACAACAGACAATCGGCTGCTCTGATGCCGCCGTGTTCCGGCTGTCAGC  
GCAGGGGCGCCCGTTCTTTTTGTCAAGACCGACCTGTCCGGTGCCTGAATGAACTGCAGGACGAGGC  
AGCGCGGCTATCGTGGCTGGCCACGACGGGCGTTCCCTTGCAGCTGTGCTCGACGTTGTCACTGAAGC  
GGGAAGGACTGGCTGCTATTGGGCGAAGTGCCGGGGCAGGATCTCCTGTCACTCACCTTGCTCCTGC  
CGAGAAAGTATCCATCATGGCTGATGCAATGCGGCGGCTGCATACGCTTGATCCGGCTACCTGCCATT  
CGACCACCAAGCGAAACATCGCATCGAGCGAGCACGTAATCGGATGGAAGCCGGTCTTGTGATCAGGA  
TGATCTGGACGAAGAGCATCAGGGGCTCGCGCCAGCCGAACTGTTCCGCAAGGCTCAAGGCGCGCATGCC  
CGACGGCGAGGATCTCGTCTGACCCATGGCGATGCCTGCTTCCGAATATCATGGTGGAAAAATGGCCG  
CTTTTCTGGATTTCATCGACTGTGGCCGGCTGGGTGTGGCGGACCGCTATCAGGACATAGCGTTGGCTAC  
CCGTGATATTGCTGAAGAGCTTGGCGGCGAATGGGCTGACCGCTTCTCCTGCTGCTTTACGGTATCGCCG  
TCCCGATTTCGACGCGCATCGCCTTCTATCGCCTTCTTGACGAGTTCTTCTGAGCGGACTCTGGGGTTCC  
CGAAATGACCGACCAAGCGACGCCAACCTGCCATCACAGATTTTCGATTCCACCGCCGCTTCTATGA  
AAGGTTGGGCTTCGGAATCGTTTTCCGGGACCGCGGCTGGATGATCCTCCAGCGCGGGGATCTCATGCT  
GGAGTTCTTCGCCCAACTTGTTTATTGAGCTTATAATGGTTACAAATAAAGCAATAGCATCAC  
AAATTTACAAAATAAAGCATTTTTTCACTGCATCTAGTTGTGGTTTGTCCAAACTCATCAATGTATC  
TTATCATGTCTGTATACCGTGCACCTCTAGCTAGAGCTTGGCGTAATCATGGTCATAGCTGTTTCTGT  
GTGAAATTGTTATCCGCTCACAAATCCACACAACATACGAGCCGGAAGCATAAAGTGTAAGCCTGGGG  
TGCCTAATGAGTGAGCTAACTCACATTAATTGCGTTGCGCTCACTGCCCGCTTTCCAGTCGGGAAACCT  
GTCGTGCCAGCTGCATTAATGAATCGGCCAACGCGCGGGGAGAGGCGGTTTGCCTATTGGGCGCTCTTC  
CGCTTCTCGCTCACTGACTCGCTGCGCTCGGTCTCGGCTGCGGCGAGCGGTATCAGCTCACTCAAAG  
GCGGTAATACGGTTATCCACAGAATCAGGGGATAACGCAGGAAAGAATGTGAGCAAAAGGCCAGCA  
AAAGGCCAGGAACCGTAAAAAGGCCGCTTGTGGCGTTTTTCCATAGGCTCCGCCCCCTGACGAGCA  
TCACAAAAATCGACGCTCAAGTCAGAGGTGGCGAAACCCGACAGGACTATAAAGATACCAGGCGTTTCC  
CCCTGGAAGCTCCCTCGTGCCTCTCCTGTTCCGACCTGCCGCTTACCGGATACCTGTCCGCTTTCTC  
CCTTCGGGAAGCGTGGCGCTTTCTCAATGCTCACGCTGTAGGTATCTCAGTTCCGGTGTAGGTCGTTCCG  
TCCAAGCTGGGCTGTGTGCACGAACCCCGTTCCAGCCGACCGCTGCGCTTATCCGGTAACTATCGTC  
TTGAGTCCAACCCGTAAGACACGACTTATCGCCACTGGCAGCAGCCACTGGTAACAGGATTAGCAGAG  
CGAGGTATGTAGGCGGTGCTACAGAGTTCTTGAAGTGGTGGCCTAACTACGGCTACACTAGAAGGACAG  
TATTTGGTATCTGCGCTCTGCTGAAGCCAGTTACCTTCGAAAAAGAGTTGGTAGCTCTTGATCCGGCA  
AACAAACCACCGCTGGTAGCGGTGGTTTTTTTTGTTTGAAGCAGCAGATTACGCGCAGAAAAAAGGAT  
CTCAAGAAGATCCTTTGATCTTTTCTACGGGGTCTGACGCTCAGTGGAAACGAAAACTCACGTTAAGGA  
TTTTGGTCATGAGATTATCAAAAAGGATCTTACCTAGATCCTTTTAAATTAATAAAGTAAAA  
TCAATCTAAAGTATATATGAGTAACTTGGTCTGACAGTTACCAATGCTTAATCAGTGAGGCACCTATC  
TCAGCGATCTGTCTATTTTCGTTTCATCCATAGTTGCCTGACTCCCGTCTGTAGATAACTACGATACGG  
GAGGGCTTACCATCTGGCCCCAGTGCTGCAATGATACCGCGAGACCCACGCTCACCGGCTCCAGATTTA  
TCAGCAATAAACCAGCCAGCCGGAAGGGCCGAGCGCAGAAGTGGTCTGCAACTTTATCCGCTCCATC  
CAGTCTATTAATTGTTGCCGGGAAGCTAGAGTAAGTAGTTCGCCAGTTAATAGTTTGCACAACGTTGTT  
GCCATTGCTACAGGCATCGTGGTGTACGCTCGTCTGTTGGTATGGCTTCATTCAGCTCCGGTTCCCAAC

GATCAAGGCGAGTTACATGATCCCCATGTTGTGCAAAAAAGCGGTTAGCTCCTTCGGTCTCCGATCG  
TTGTCAGAAGTAAGTTGGCCGAGTGTATCACTCATGGTTATGGCAGCACTGCATAATTCTCTTACTG  
TCATGCCATCCGTAAGATGCTTTTCTGTGACTGGTGAAGTCAACCAAGTCATTCTGAGAATAGTGTA  
TGCGGCGACCGAGTTGCTCTTGCCCGCGTCAATACGGGATAATACCGCGCCACATAGCAGAACTTTAA  
AAGTGCTCATCATTGAAAAACGTTCTTCGGGGCGAAAACTCTCAAGGATCTTACCCTGTTGAGATCCA  
GTTTCGATGTAACCCACTCGTGCACCCAAGTATCTTCAGCATCTTTTACTTTTACCAGCGTTTCTGGGTG  
AGCAAAAACAGGAAGGCAAAATGCCGCAAAAAAGGGAATAAGGGCGACACGGAAATGTTGAATACTCA  
TACTCTTCCTTTTTCAATATTATTGAAGCATTATCAGGGTTATTGTCTCATGAGCGGATACATATTG  
AATGTATTTAGAAAAATAAACAAATAGGGGTTCCGCGCACATTTCCCGAAAAGTGCCACCTGACGTCG  
ACGGATCGGGAGATCTCCCGATCCCCTATGGTGCAGTCTCAGTACAATCTGCTCTGATGCCGCATAGTT  
AAGCCAGTATCTGCTCCCTGCTTGTGTGTTGGAGGTGCGTGAAGTAGTGCAGGAGCAAAAATTAAGCTAC  
AACAAAGCAAGGCTTGACCGACAATTGCATGAAGAATCTGCTTAGGGTTAGGCGTTTTGCGCTGCTTCG  
CGATGTACGGGCCAGATATACGCGTTGACATTGATTATTGACTAGTTATTAATAGTAATCAATTACGG  
GGTCATTAGTTCATAGCCCATATATGGAGTTCGCGTTACATAACTTACGGTAAATGGCCCGCCTGGCT  
GACCGCCAACGACCCCGCCATTGACGTCAATAATGACGTATGTTCCCATAGTAACGCCAATAGGGA  
CTTTCCATTGACGTCAATGGGTGGAGTATTTACGGTAAACTGCCCACTTGGCAGTACATCAAGTGTATC  
ATATGCCAAGTACGCCCCCTATTGACGTCAATGACGGTAAATGGCCCGCCTGGCATTATGCCCAGTACA  
TGACCTTATGGGACTTTCTACTTGGCAGTACATCTACGTATTAGTCATCGCTATTACCATGGTGATGC  
GGTTTTGGCAGTACATCAATGGGCGTGGATAGCGGTTTACTCACGGGGATTTCCAAGTCTCCACCCCA  
TTGACGTCAATGGGAGTTTGTTTTGGCACAAAATCAACGGGACTTTCCAAAATGTCGTAACAACCTCCG  
CCCCATTGACGCAATGGGCGGTAGGCGTGTACGGTGGGAGGTCTATATAAGCAGAGCTCGTTTAGTGA  
ACCGTCAGATCGCCTGGAGACGCCATCCACGCTGTTTTGACCTCCATAGAAGACACCGGGACCGATCCA  
GCCTCCGGACTCTAGAGGATCGAACCTT

Insert oligo HER2 signal peptide:

AGCCTCCGGACTCTAGAGGATCGAACCTTATGGAGCTGGCGGCCCTTGTGCCGCTGGGGGCTCCTCCTCG  
CTCTCTTGCCACCTGGAGCAGCTAGTGGCGGCCACGACTC

Restriction enzyme for bead release: *AscI*

### **pHisZ\_VEGF\_eGFP**

Backbone pHisZ: same as for pHisZ\_GFP11

Insert 1 VEGF:

**CGGGTACCGGTCCGACCGGTGGATCCGGTGAAGGAGGAGGGCAGAATCATCACGAAGTGGTGAAGTT  
CATGGATGTCTATCAGCGCAGCTACTGCCATCCAATCGAGACCCTGGTGGACATCTTCCAGGAGTACCC  
TGATGAGATCGAGTACATCTTCAAGCCATCCTGTGTGCCCTGATGCGATGCGGGGGCTGCTGCAATGA  
CGAGGGCCTGGAGTGTGTGCCACTGAGGAGTCCAACATCACCATGCAGATTATGCGGATCAAACCTCA  
CCAAGGCCAGCACATAGGAGAGATGAGCTTCTACAGCACAAACAATGTGAATGCAGACCAAAGAAAG  
ATAGAGCAAGACAAGAAAAATGTGACAAGCCGAGGCGGGGCTCAGGATCG**

Insert2 eGFP:

**TGTGACAAGCCGAGGCGGGGCTCAGGATCGATGGTGAAGGCGAGGAGCTGTTACCGGGGTGG  
TGCCCATCCTGGTTCGAGCTGGACGGCGACGTAACGGCCACAAGTTTCAAGCGTGTCCGGCGAGGGCGAGG  
GCGATGCCACCTACGGCAAGCTGACCCTGAAGTTTCACTCTGCACCACCGGCAAGCTGCCCGTGCCTGGCC  
CACCTCGTGACCACCTGACCTACGGCGTGCAGTGTTCAGCCGCTACCCCGACCACATGAAGCAGCAC  
GACTTCTTCAAGTCCGCCATGCCCGAAGGCTACGTCCAGGAGCGCACCATCTTCTTCAAGGACGACGGC  
AACTACAAGACCCGCGCCGAGGTGAAGTTTCGAGGGCGACACCCTGGTGAACCGCATCGAGCTGAAGGGC  
ATCGACTTCAAGGAGGACGGCAACATCCTGGGGACAAGCTGGAGTACAACATAACAGCCACAACGTC  
TATATCATGGCCGACAAGCAGAAGAACGGCATCAAGGTGAAGTTCAAGATCCGCCACAACATCGAGGAC  
GGCAGCGTGCAGCTCGCCGACCACTACCAGCAGAACACCCCCATCGGGCGACGGCCCCGTGCTGCTGCCCG  
ACAACCACTACCTGAGCACCCAGTCCGCCCTGAGCAAAGACCCCAACGAGAAGCGCGATCATATGGTCC  
TGCTGGAGTTCGTGACCGCCGCGGGATCACTCTGGCATGGACGAGCTGTACAAGGCGGCCGACCA  
CTC**

Restriction enzyme for bead release: *NotI*

### **pHisZ\_VEGF\_mCherry**

Backbone pHisZ: same as for pHisZ\_GFP11

Insert1 VEGF: Same as for pHisZ\_VEGF\_eGFP

Insert2 mCherry:

**TGTGACAAGCCGAGGGCGGGCTCAGGATCGATGGTGAGCAAGGGCGAGGAGGATAACATGGCCATCA  
TCAAGGAGTTCATGCGCTTCAAGGTGCACATGGAGGGCTCCGTGAACGGCCACGAGTTCGAGATCGAGG  
GCGAGGGCGAGGGCCGCCCTACGAGGGCAGCCAGACCGCCAAGCTGAAGGTGACCAAGGGTGGCCCCC  
TGCCCTTCGCTGGGACATCCTGTCCCCTCAGTTCATGTACGGCTCCAAGGCCTACGTGAAGCACCCCGC  
CGACATCCCCGACTACTTGAAGCTGTCTTCCCCGAGGGCTTCAAGTGGGAGCGCGTGATGAACTTCGA  
GGACGGCGGGCGTGGTGACCGTGACCCAGGACTCCTCCCTGCAGGACGGCGAGTTCATCTACAAGGTGAA  
GCTGCGCGGCACCAACTTCCCCTCCGACGGCCCCGTAATGCAGAAGAAGACCATGGGCTGGGAGGCCTC  
CTCCGAGCGGATGTACCCCGAGGACGGCGCCCTGAAGGGCGAGATCAAGCAGAGGCTGAAGCTGAAGGA  
CGGCGGCCACTACGACGCTGAGGTCAAGACCACCTACAAGGCCAAGAAGCCCGTGCAGCTGCCCGGCGC  
CTACAACGTCAACATCAAGTTGGACATCACCTCCCACAACGAGGACTACACCATCGTGGAACAGTACGA  
ACGCGCCGAGGGCCGCCACTCCACCGGCGGCATGGACGAGCTGTACAAGGGCGGCCGACGACTC**

Restriction enzyme for bead release: NotI

### **pHisZ\_mCherry\_EGFP**

Backbone pHisZ: same as for pHisZ\_GFP11

Insert1 mCherry:

**CGGGTACCGGTCGCCACCGGTGGATCCGGTATGGTGAGCAAGGGCGAGGAGGATAACATGGCCATCAT  
CAAGGAGTTCATGCGCTTCAAGGTGCACATGGAGGGCTCCGTGAACGGCCACGAGTTCGAGATCGAGGG  
CGAGGGCGAGGGCCGCCCTACGAGGGCAGCCAGACCGCCAAGCTGAAGGTGACCAAGGGTGGCCCCCT  
GCCCTTCGCTGGGACATCCTGTCCCCTCAGTTCATGTACGGCTCCAAGGCCTACGTGAAGCACCCCGCC  
GACATCCCCGACTACTTGAAGCTGTCTTCCCCGAGGGCTTCAAGTGGGAGCGCGTGATGAACTTCGAG  
GACGGCGGGCGTGGTGACCGTGACCCAGGACTCCTCCCTGCAGGACGGCGAGTTCATCTACAAGGTGAAG  
CTGCGCGGCACCAACTTCCCCTCCGACGGCCCCGTAATGCAGAAGAAGACCATGGGCTGGGAGGCCTCCT  
CCGAGCGGATGTACCCCGAGGACGGCGCCCTGAAGGGCGAGATCAAGCAGAGGCTGAAGCTGAAGGACG  
GCGGCCACTACGACGCTGAGGTCAAGACCACCTACAAGGCCAAGAAGCCCGTGCAGCTGCCCGGCGCCT  
ACAACGTCAACATCAAGTTGGACATCACCTCCCACAACGAGGACTACACCATCGTGGAACAGTACGAAC  
GCGCCGAGGGCCGCCACTCCACCGGCGGCATGGACGAGCTGTACAAGGGCTCAGGATCG**

Insert2 eGFP:

**ATGGACGAGCTGTACAAGGGCTCAGGATCGATGGTGAGCAAGGGCGAGGAGCTGTTACCGGGGTGG  
TGCCCATCCTGGTTCGAGCTGGACGGCGACGTAACCGCCACAAGTTCAGCGTGTCCGGCGAGGGCGAGG  
GCGATGCCACCTACGGCAAGCTGACCCTGAAGTTCATCTGCACCACCGGCAAGCTGCCCGTGCCTGGCC  
CACCTCGTGACCACCTGACCTACGGCGTGAGTGTTCAGCCGCTACCCCGACCACATGAAGCAGCAC  
GACTTCTTCAAGTCCGCCATGCCCCAAGGCTACGTCCAGGAGCGCACCATCTTCTTCAAGGACGACGGC  
AACTACAAGACCCGCGCCGAGGTGAAGTTCGAGGGCGACACCCTGGTGAACCGCATCGAGCTGAAGGGC  
ATCGACTTCAAGGAGGACGGCAACATCCTGGGGCACAAGCTGGAGTACAACACTACAACAGCCACAACGTC  
TATATCATGGCCGACAAGCAGAAGAACGGCATCAAGGTGAAGTTCAGATCCGCCACAACATCGAGGAC  
GGCAGCGTGCAGCTCGCCGACCACTACCAGCAGAACACCCCATCGGCGACGGCCCCGTGCTGCTGCCCG  
ACAACCACTACCTGAGCACCCAGTCCGCCCTGAGCAAAGACCCCAACGAGAAGCGCGATCACATGGTCC  
TGCTGGAGTTCGTGACCGCCCGGGGATCACTCTCGGCATGGACGAGCTGTACAAGGGCGGCCGACGCA  
CTC**

Restriction enzyme for bead release: NotI

### **pcDNA3.3\_HerceptinHeavy\_GFP11**

Backbone pcDNA3.3\_HerceptinHeavy:

**CTCGAGGGCGCGCCATAACTCGAGAAGGGTTTCGATCCCTACCGGTTAGTAATGAGTTTAAACGGGGGA  
GGCTAACTGAAACACGGAAGGAGACAATACCGGAAGGAACCCGCGCTATGACGGCAATAAAAAGACAG**

AATAAAACGCACGGGTGTTGGGTCGTTTGTTCATAAACGCGGGGTTCCGGTCCCAGGGCTGGCACTCTGT  
CGATACCCACCGAGACCCCATTTGGGGCCAATACGCCCGGTTTCTTCCTTTTCCCAACCCACCCCA  
AGTTCCGGGTGAAGGCCAGGGCTCGCAGCCAACGTCGGGGCGGCAGGCCCTGCCATAGCAGATCTGCGC  
AGCTGGGGCTCTAGGGGGTATCCCACGCGCCCTGTAGCGGCGCATTAAAGCGCGGCGGGTGTGGTGGTT  
ACGCGCAGCGTGACCGCTACACTTGCCAGCGCCCTAGCGCCCGCTCCTTTTCGCTTCTTCCCTTCTTTC  
TCGCCACGTTTCGCGGGCTTTCCCGTCAAGCTCTAAATCGGGGCATCCCTTTAGGGTTCCGATTTAGTGC  
TTTACGGCACCTCGACCCCAAAAAAATTGATTAGGGTGTAGGTTTACGTAAGTGGGCCATCGCCCTGATA  
GACGGTTTTTCGCCCTTTGACGTTGGAGTCCACGTTCTTTAATAGTGGACTCTTGTTCAAAACCTGGAAC  
AACACTCAACCCTATCTCGGTCTATTCTTTTGTATTTATAAGGGATTTTGGGGATTTCCGCCCTATTGGTT  
AAAAAATGAGCTGATTTAACAAAAATTTAACGCGAATTAATTCTGTGGAATGTGTGTCAGTTAGGGTG  
TGGAAAAGTCCCAGGCTCCCAGCAGGCAGAAAGTATGCAAAGCATGCATCTCAATTAGTCAGCAACCAG  
GTGTGAAAAGTCCCAGGCTCCCAGCAGGCAGAAAGTATGCAAAGCATGCATCTCAATTAGTCAGCAAC  
CATAGTCCCGCCCTAACTCCGCCATCCCGCCCTAACTCCGCCAGTTCGCCCTTCTCCGCCCATG  
GCTGACTAATTTTTTTTATTTATGCAGAGGCCGAGGCCGCTCTGCCTCTGAGCTATTCCAGAAGTAGT  
GAGGAGGCTTTTTTGGAGGCCTAGGCTTTTGCAAAAAGCTCCCGGGAGCTTGTATATCCATTTTCGGAT  
CTGATCAAGAGACAGGATGAGGATCGTTTCGCATGATTGAACAAGATGGATTGCACGCAGGTTCTCCGG  
CCGCTTGGGTGGAGAGGCTATTCCGGCTATGACTGGGCACAACAGACAATCGGCTGCTCTGATGCCCGG  
TGTTCCGGCTGTACGCGCAGGGGCGCCCGTTCTTTTTGTCAAGACCGACCTGTCCGGTGCCTGAATG  
AACTGCAGGACGAGGCAGCGCGGCTATCGTGGCTGGCCACGACGGGCGTTTCTTGGCAGCTGTGCTCG  
ACGTTGTCACTGAAGCGGAAGGGACTGGCTGCTATTTGGGCGAAGTCCCGGGGAGGATCTCCTGTGAT  
CTCACCTTGCTCCTGCCGAGAAAGTATCCATCATGGCTGATGCAATGCGGCGGCTGCATACGCTTGATC  
CGGCTACCTGCCATTCCGACCAAGCGAAACATCGCATCGAGCGAGCACGTAAGTCCGATGGAAGCCG  
GTCTTGTGATCAGGATGATCTGGACGAAGAGCATCAGGGGCTCGCGCCAGCCGAAGTTCGCCAGGC  
TCAAGGCGCGCATGCCCGACGGCGAGGATCTCGTGTGACCCATGGCGATGCCTGCTTCCGAATATCA  
TGGTGAAAAATGGCCGCTTTTCTGGATTTCATCGACTGTGGCCGGCTGGGTGTGGCGGACCGCTATCAGG  
ACATAGCGTTGGCTACCCGTGATATTGCTGCAAGAGCTTGGCGGCGAATGGGCTGACCGCTTCTCTGTG  
TTTACGGTATCGCCGCTCCCGATTCCGACGCAATCGCCTTCTATCGCCTTCTTACGAGTTCTTCTGAGC  
GGGACTCTGGGGTTTCGCGAAATGACCGACCAAGCGACGCCCAACCTGCCATCACGAGATTTTCGATTTCA  
CCGCCGCTTCTATGAAAGGTTGGGCTTCCGAATCGTTTTCCGGGACGCGGCTGGATGATCCTCCAGC  
GCGGGGATCTCATGCTGGAGTTCTTCGCCACCCCAACTTGTATTATGACGCTTATAATGGTTACAAAT  
AAAGCAATAGCATCACAAATTTACAAATAAAGCATTTTTTTCACTGCATTCTAGTTGTGGTTTTGTCCA  
AACTCATCAATGTATCTTATCATGTCTGTATACCGTCGACCTCTAGCTAGAGCTTGGCGTAATCATGGT  
CATAGCTGTTTCTGTGTGAAATTGTTATCCGCTCACAAATCCACACAACATACGAGCCGGAAGCATAA  
AGTGTAAGCCTGGGGTGCCTAATGAGTGAGCTAACTCACATTAATTGCGTTGCGCTCACTGCCCGCTT  
TCCAGTCGGGAAACCTGTGCTGCCAGCTGCATTAATGAATCGGCCAACGCGCGGGGAGAGGCGGTTTGC  
GTATTGGGCGCTTCTCCGCTTCTCCTGCTCACTGACTCGCTGCGCTCGGTCGTTCCGGCTGCGGCGAGCGGT  
ATCAGCTCACTCAAAGGCGGTAATACGGTTATCCACAGAATCAGGGGATAACGCAGGAAAGAATGT  
GAGCAAAAGGCCAGCAAAAGGCCAGGAACCGTAAAAAGGCCGCTTGTGGCGTTTTTCCATAGGCTCC  
GCCCCCTGACGAGCATCACAAAAATCGACGCTCAAGTCAGAGGTGGCGAAACCCGACAGGACTATAAA  
GATACCAGGCGTTTTCCCTGGAAGCTCCCTCGTGCCTCTCCTGTCCGACCTGCCGTTACCGGATA  
CCTGTCCGCTTTCTCCCTTCGGGAAGCGTGGCGCTTTCTCAATGCTCACGCTGTAGGTATCTCAGTTCC  
GTGTAGGTGCTTCCGCTCCAAGCTGGGCTGTGTGCACGAACCCCCGTTCCAGCCGACCGCTGCCCTTAT  
CCGTAATATCGTCTTGTAGTCCAACCCGTAAGACACGACTTATCGCCACTGGCAGCAGCCACTGGTA  
ACAGGATTAGCAGAGCGAGGTATGTAGGCGGTGTACAGAGTTCTTGAAGTGGTGGCCTAACTACGGCT  
ACACTAGAAGGACAGTATTTGGTATCTGCGCTCTGCTGAAGCCAGTTACCTTCGGAAAAAGAGTTGGTA  
GCTCTTGATCCGGCAAACAAACCACCGCTGGTAGCGGTGGTTTTTTTTGTTTGAAGCAGCAGATTACGC  
GCAGAAAAAAGGATCTCAAGAAGATCCTTTGATCTTTTCTACGGGGTCTGACGCTCAGTGAACGAA  
AACTCACGTTAAGGGATTTTGGTCATGAGATTATCAAAAAGGATCTTACCTAGATCCTTTTAAATTA  
AAATGAAGTTTTAAATCAATCTAAAGTATATATGAGTAAACTTGGTCTGACAGTTACCAATGCTTAAT  
CAGTGAGGCACCTATCTCAGCGATCTGTCTATTTTCGTTTCCATAGTTGCCTGACTCCCCGTCGTGTAG  
ATAACTACGATACGGGAGGGCTTACCATCTGGCCCCAGTGTGCAATGATACCGCGAGACCCACGCTCA  
CCGGCTCCAGATTTATCAGCAATAAACCCAGCCAGCCGGAAGGGCCGAGCGCAGAAAGTGGTCTGCAACT  
TTATCCGCTCCATCCAGTCTATTAATTTGTTGCCGGGAAGCTAGAGTAAGTAGTTCCGCCAGTTAATAGT  
TTGCGCAACGTTGTTGCCATTGCTACAGGCATCGTGGTGTACGCTCGTCTGTTTGGTATGGCTTCAATC  
AGCTCCGGTTCCCAACGATCAAGGCGAGTTACATGATCCCCATGTTGTGCAAAAAAGCGGTTAGCTCC  
TTCCGGTCTCCGATCGTTGTGAGAAGTAAGTTGGCCGCGAGTGTATCACTCATGGTTATGGCAGCACTG  
CATAATCTCTTACTGTGATGCCATCCGTAAGATGCTTTTCTGTGACTGGTGTGACTCAACCAAGTCA  
TTCTGAGAATAGTGTATGCGGCGACCGAGTTGCTTTGCCCGGCGTCAATACGGGATAATACCGCGCCA  
CATAGCAGAACTTTAAAAAGTGTCTCATCATTTGAAAACGTTCTTCCGGGGCGAAAACCTCTCAAGGATCTTA

CCGCTGTTGAGATCCAGTTCGATGTAACCCACTCGTGCACCCAAGTATCTTCAGCATCTTTTACTTTCA  
CCAGCGTTTTCTGGGTGAGCAAAAACAGGAAGGCAAAATGCCGCAAAAAGGGAATAAGGGCGACACGG  
AAATGTTGAATACTCATACTCTTCTTTTTCAATATTATTGAAGCATTTATCAGGGTTATTGTCTCATG  
AGCGGATACATATTTGAATGTATTTAGAAAAATAAACAAATAGGGGTTCCGCGCACATTTCCCGAAA  
AGTGCCACCTGACGTGACGGATCGGGAGATCTCCCGATCCCCTATGGTCGACTCTCAGTACAATCTGC  
TCTGATGCCGCATAGTTAAGCCAGTATCTGCTCCCTGCTTGTGTGTTGGAGGTCGCTGAGTAGTGC  
AGCAAAATTTAAGCTACAACAAGGCAAGGCTTGACCGACAATTGCATGAAGAATCTGCTTAGGGTTAG  
GCGTTTTGCGCTGCTTCCGCGATGTACGGGCCAGATATACGCGTTGACATTGATTATTGACTAGTTATTA  
ATAGTAATCAATTACGGGGTCATTAGTTCATAGCCCATATATGGAGTTCGCGGTTACATAACTTACGGT  
AAATGGCCCCGCTGGCTGACCGCCCAACGACCCCGCCATTGACGTCAATAATGACGTATGTTCCCAT  
GTAACGCCAATAGGGACTTTCCATTGACGTCAATGGGTGGAGTATTTACGGTAAACTGCCCACTTGCCA  
GTACATCAAGTGTATCATATGCCAAGTACGCCCCCTATTGACGTCAATGACGGTAAATGGCCCCGCTGG  
CATTATGCCAGTACATGACCTTATGGGACTTTCTACTTGGCAGTACATCTACGTATTAGTCATCGCT  
ATTACCATGGTGATGCGGTTTTGGCAGTACATCAATGGGCGTGGATAGCGGTTTACTCACGGGGATTT  
CCAAGTCTCCACCCCAATTGACGTCAATGGGAGTTTTGTTTTGGCACAAAATCAACGGGACTTTCCAAAA  
TGTCGTAACAACCTCCGCCCCATTGACGCAATGGGCGGTAGGCGTGTACGGTGGGAGGTCTATATAAGC  
AGAGCTCGTTTTAGTGAACCGTCAGATCGCCTGGAGACGCCATCCACGCTGTTTTGACCTCCATAGAAGA  
CACCGGGACCGATCCAGCCTCCGGACTCTAGAGGATCGAACCCCTTATCGATATGGAGACAGACACTC  
CTGCTATGGGACTGCTGCTCTGGGTTCCAGGTTCCACGTGGGAGGTGCAGCTCGTTGAAAGCGGTGGC  
GGGCTGGTGCAGCCCCGGCGGATCCTTGAGACTTTCATGTGCAGCCTCCGGCTTTAACATCAAAGACACC  
TATATTTACTGGGTGAGACAGGCCCCAGGGAAGGGCCTGGAATGGGTCGCTAGAATTTACCTACAAAC  
GGTTATACCCGGTATGCCGATAGTGTAAAAGGACGATTTACAATCTCTGCCGACACTTCTAAGAATACT  
GCATATCTGCAGATGAATTTCTCTGCGCGCTGAGGATACTGCTGTGTACTACTGCTCAAGGTGGGGCGGG  
GACGGATTCTACGCTATGGATTACTGGGGTCAAGGAACACTGGTGACCGTTAGTAGCGTAGCACCAAG  
GGCCCATCGGTCTTCCCCCTGGCACCCCTCCTCCAAGAGCACCTCTGGGGGCACAGCGGCCCTGGGCTGCC  
TGGTCAAGGACTACTTCCCCGAACCGGTGACGGTGTCTGGAACCTCAGGCGCCTGACCAGCGCGCTGC  
ACACCTTCCCAGCTGCTTACAGTCCCTCAGGACTTACTCCCTCAGCAGCGTGGTGGCCCTCCAG  
CAGCTTGGGCACCCAGACTACATCTGCAACGTGAATCACAAGCCAGCAACACCAAGGTGGACAAGAA  
AGTTGAGCCCAAATCTTTCGACAAAACCTCACACATGCCACCGTGCCAGCACCTGAACTCCTGGGGGG  
ACCGTCAGTCTTCTTCTTCCCCCAAACCCAAGGACACCCTCATGATCTCCCGGACCCTGAGGTCACA  
TGCGTGGTGGTGGACGTGAGCCACGAAGACCCTGAGGTCAAGTTCAACTGGTACGTGGACGGCGTGGAG  
GTGCATAATGCCAAGACAAAGCCGCGGGAGGAGCAGTACAACAGCACGTACCGTGTGGTACGCGTCTC  
ACCGTCTGCACCAGGACTGGCTGAATGGCAAGGAGTACAAGTGAAGGTCTCCAACAAAGCCCTCCCA  
GCCCCATCGAGAAAACCATCTCCAAAGCCAAAGGGCAGCCCCGAGAACCACAGGTGTACACCCTGCC  
CCATCCCGGGATGAGCTGACCAAGAACCAGGTGACCTGACCTGCCTGGTCAAAGGCTTCTATCCCAGC  
GACATCGCCGTGGAGTGGGAGAGCAATGGGCAGCCGGAGAACAACACTACAAGACCACGCCTCCCGTGTG  
GACTCCGACGGCTCCTTCTTCTTACAGCAAGCTCACCGTGGACAAGAGCAGGTGGCAGCAGGGGAAC  
GTCTTCTCATGCTCCGTGATGCATGAGGCTCTGCACAACCACTACACGCAGAAGAGCCTCTCCCTGTC  
**CCCGGGTAAA**

Insert GFP 11 oligo:

CAGAAGAGCCTCTCCCTGTCCCCGGTAAACGGGTACCGGTGCCACCGGTGGATCCGGTCTGACCAC  
ATGGTCTTTCATGAGTACGTAAATGCTGCTGGGATTACAGCAGCTGCATAAGGCGCGCCCGACTC

Restriction enzyme for bead release: *AscI*

### **pOptivec\_HerceptinLight\_GFP11**

Backbone pOptivec\_HerceptinLight:

**CTCGAGGGGGCGCCATAACTCGAGAAGGGTTGGATCCCTACCGGTGCTGCGGCCGCGCAGTTAACGCC**  
GCCCCCTCTCCCTCCCCCCCCCTAACGTTACTGGCCGAAGCCGCTTGAATAAGGCCGGTGTGCGTTTGT  
CTATATGTTATTTCCACCATATTGCCGTCTTTTGGCAATGTGAGGGCCCGAAACCTGGCCCTGTCTT  
CTTGACGAGCATTCTAGGGGTCTTTCCCTCTCGCCAAAGGAATGCAAGGTCTGTTGAATGTCGTGAA  
GGAAGCAGTTCTCTGGAAGCTTCTTGAAGACAAAACCTCTGTAGCGACCCTTTGACAGGACGGGAA  
CCCCCACCTGGCGACAGGTGCCTCTGCGGCCAAAAGCCACGTGTATAAGATACACCTGCAAAGGCGGC  
ACAACCCAGTGCCACGTTGTGAGTTGGATAGTTGTGGAAAGAGTCAAATGGCTCTCCTCAAGCGTATT  
CAACAAGGGGCTGAAGGATGCCAGAAGGTACCCATTGTATGGGATCTGATCTGGGGCTCGGTACAC  
ATGCTTTACATGTGTTTGTAGTCGAGGTTAAAAAACGTTAGGCCCCCGAACCCAGGGGACGTGGTTTT  
CCTTTGAAAAACACGATGATAATATGGCCACAAGATCTGCCACCATGGTTCGACCATTGAACTGCATCG



TCGCCGTGTCCAAAATATGGGGATTGGCAAGAACGGAGACCTACCCTGGCCTCCGCTCAGGAACGAGT  
TCAAGTACTTCCAAAAGAATGACCACAACCTCTTCAGTGGAAGGTAACAGAATCTGGTGATTATGGGT  
AGGAAAACCTGGTTCTCCATTCTGAGAAGAATCGACCTTTAAAGGACAGAATTAATATAGTTCTCAGT  
AGAGAACTCAAAGAACCACCAGGAGTCAATTTCTTGCAAAAGTTTGGATGATGCCTTAAGACTT  
ATTGAACAACCGGAATTGGCAAGTAAAGTAGACATGGTTTGGATAGTCGGAGGCAGTTCTGTTTACCA  
GGAAGCCATGAATCAACCAGGCCACCTCAGACTCTTTGTGACAAGGATCATGCAGGAATTTGAAAGTGA  
CACGTTTTTCCAGAAATTGATTTGGGGAAAATATAAACTTCTCCAGAATACCCAGGCGTCTCTCTGA  
GGTCCAGGAGGAAAAAGGCATCAAGTATAAGTTTGAAGTCTACGAGAAGAAAGACTAAAACCGGTTAG  
TAATGAGTTTAAACGGGGGAGGCTAACTGAAACACGGAAGGAGACAATACCGGAAGGAACCCGCGCTA  
TGACGGCAATAAAAAGACAGAATAAAACGCACGGGTGTTGGGTGCTTTGTTTCATAAACGGGGGTTCCG  
GTCCCAGGGCTGGCACTCTGTGATAACCCACCAGACCCCATTTGGGGCCAATACGCCCGGCTTTCTTCC  
TTTTCCCCACCCCAACCCCAAGTTCGGGTGAAGGCCAGGGCTCGCAGCCAACGTCGGGGCGGCAGGCC  
CTGCCATTACCGTCGACCTCTAGCTAGAGCTTGGCGTAATCATGGTCATAGCTGTTTCTGTGTGAAAT  
TGTTATCCGCTCACAATTCCACACAACATACGAGCCGGAAGCATAAAGTGTAAGCCTGGGGTGCCTAA  
TGAGTGAGCTAACTCACATTAATTGCGTTGCGCTCACTGCCCGCTTTCCAGTCGGGAAACCTGTGCTGC  
CAGCTGCATTAATGAATCGGCCAACGCGGGGAGAGGCGGTTTGGGTATTGGGGCGTCTTCCGCTTCC  
TCGCTCACTGACTCGCTGCGCTCGGTGCTTCCGCTGCGGCGAGCGGTATCAGCTCAAAAGGCGGTA  
ATACGGTTATCCACAGAATCAGGGGATAACGCAGGAAAGAATGTGAGCAAAAGGCCAGCAAAAGGC  
CAGGAACCGTAAAAAGGCCGCTTGGTGGCGTTTTTCCATAGGCTCCGCCCCCTGACGAGCATCACAA  
AAATCGACGCTCAAGTCAGAGGTGGCGAAACCCGACAGGACTATAAAGATACCAGGCGTTTCCCCCTGG  
AAGCTCCCTCGTGCGCTCTCTGTTCGGACCTGCCGTTACCGGATACCTGTCCGCTTTCTCCCTTCG  
GGAAGCGTGGCGCTTTCTCATAGCTCACGCTGTAGGTATCTCAGTTCGGTGTAGGTGCTTCGCTCCAAG  
CTGGGCTGTGTGCACGAACCCCGTTCCAGCCGACCCTGCCCTTATCCGGTAACTATCGTCTTGAGT  
CCAACCCGGTAAGACACGACTTATCGCCACTGGCAGCAGCCACTGGTAACAGGATTAGCAGAGCGAGGT  
ATGTAGGCGGTGCTACAGAGTCTTGAAGTGGTGGCCTAACTACGGCTACACTAGAAGAACAGTATTTG  
GTATCTCGCTCTGCTGAAGCCAGTTACCTTCGGAAGAAAGAGTTGGTAGCTCTTGATCCGGCAACAA  
CCACCGCTGGTAGCGGTTTTTTTTGTTTGAAGCAGCAGATTACGCGCAGAAAAAAGGATCTCAAGAAG  
ATCCTTTGATCTTTTTCTACGGGTCTGACGCTCAGTGAACGAAAACTCACGTTAAGGGATTTTGGTCA  
TGAGATTATCAAAAAGGATCTTCACCTAGATCCTTTTAAATTAATAAAGTAAAGTTTAAATCAATCTAA  
AGTATATATGAGTAACTTGGTCTGACAGTTACCAATGCTTAATCAGTGAGGCACCTATCTCAGCGATC  
TGTCTATTTCTGTTTCATCCATAGTTGCTGACTCCCCGTCGTGTAGATAACTACGATACGGGAGGGCTTA  
CCATCTGGCCCCAGTGTGCAATGATACCGCGAGACCCACGCTCACCGGCTCCAGATTTATCAGCAATA  
AACCAGCCAGCCGGAAGGGCCGAGCGCAGAAGTGGTCTGCAACTTTATCCGCTCCATCCAGTCTATT  
AATTGTTGCCGGAAGCTAGAGTAAGTAGTTCGCCAGTTAATAGTTTGGCGAACGTTGTTGCCATTGCT  
ACAGGCATCGTGGTGTACGCTCGTCTGTTTGGTATGGCTTCAATCAGCTCCGGTTCACCAACGATCAAGG  
CGAGTTACATGATCCCCATGTTGTGCAAAAAAGCGGTTAGCTCCTTCGGTCTCCGATCGTTGTCAGA  
AGTAAGTTGGCCGAGTGTATCACTCATGGTTATGGCAGCACTGCATAATTTCTTACTGTCATGCCA  
TCCGTAAGATGCTTTTCTGTGACTGGTGTGACTCAACCAAGTCATTCTGAGAATAGTGTATGCGGGCA  
CCGAGTTGCTCTTGGCCGCGTCAATACGGGATAATACCGCGCCACATAGCAGAACTTTAAAGTGCTC  
ATCATTGAAAACGTTCTTCGGGGCGAAAACTCTCAAGGATCTTACCCTGTTGAGATCCAGTTCGATG  
TAACCCACTCGTGACCCAACTGATCTTCAGCATCTTTTACTTTACCAGCGTTTCTGGGTGAGCAAAA  
ACAGGAAGGCAAAATGCCGCAAAAAAGGGAATAAGGGCGACACGGAATGTTGAATACTCATACTCTT  
CCTTTTTCAATATTATTGAAGCATTATCAGGGTATTGTCTCATGAGCGGATACATATTTGAATGTAT  
TTAGAAAAATAAACAAATAGGGGTTCCGCGCACATTTCCCCGAAAAGTGCCACCTGACGTCGACGGATC  
GGGAGATCAGTTGACATTGATTATTGACTAGTTATTAATAGTAATCAATTACGGGGTCATTAGTTTCAT  
AGCCCATATATGGAGTTCGCGTTACATAACTTACGGTAAATGGCCCGCTGGCTGACCGCCCAACGAC  
CCCCGCCATTGACGTCAATAATGACGTATGTTCCCATAGTAACGCCAATAGGGACTTTCCATTGACGT  
CAATGGGTGGAGTATTTACGGTAACTGCCACTTGGCAGTACATCAAGTGTATCATATGCCAAGTACG  
CCCCCTATTGACGTCAATGACGGTAAATGGCCCGCTGGCATTATGCCAGTACATGACCTTATGGGAC  
TTTTCTACTTGGCAGTACATCTACGTATTAGTCATCGCTATTACCATGGTGATGCGGTTTTTGGCAGTAC  
ATCAATGGGCGTGATAGCGGTTTACTCACGGGGATTTCCAAGTCTCCACCCATTGACGTCAATGGG  
AGTTTTGTTTTGGCACAAAATCAACGGGACTTTCCAAAATGTCGTAACAACTCCGCCCCATTGACGCAA  
ATGGGCGGTAGGCGTGTACGGTGGGAGGTTCTATATAAGCAGAGCTCGTTTAGTGAACCGTCAGATCGCC  
TGGAGACGCCATCCACGCTGTTTTGACCTCCATAGAAGACACCGGGACCGATCCAGCCTCCGGACTCTA  
GAGGATCCAACCTTATCGATATGGAGACAGACACTCCTGCTATGGGTAAGTGTCTGCTCTGGGTTCCA  
GGTTCCACGTGGGATATTCAGATGACGCAGTCTCCCTCCTCCTCAGTGCTTCCGTGGGAGATAGGGTT  
ACTATTACCTGCCGGCCTCTCAAGACGTCAACACTGCAGTAGCCTGGTATCAGCAGAAGCCTGGTAAA  
GCCCCAAAACCTGCTGATCTACAGCGCAAGTTTCTTGTACTCCGGGGTGCCTCTAGATTTAGCGGCTCA  
CGATCTGGAACAGACTTTACACTGACCATCAGCTCACTTCAGCCAGAGGACTTCGCTACCTATTACTGT

CAACAGCACTATACCACACCTCCCACATTTGGCCAGGGTACTAAGGTGGAAATAAAGCGTACGGTGGCT  
GCACCATCTGTCTTCATCTTCCC GCCATCTGATGAGCAGTTGAAATCTGGAAGTGCCTCTGTTGTGTGCC  
TGCTGAATAACTTCTATCCCAGAGAGGCCAAAAGTACAGTGGAAAGTGGATAACGCCCTCCAATCGGGTA  
ACTCCCAGGAGAGTGTACAGAGCAGGACAGCAAGGACAGCACCTACAGCCTCAGCAGCACCTGACGC  
TGAGCAAAGCAGACTACGAGAAACACAAAGTCTACGCCTGCGAAGTCACCCATCAGGGCTGAGTTCGC  
CCGTCAAAAGAGCTTCAACAGGGGAGAGTGT

Insert GFP11 oligo:

GTCACAAAGAGCTTCAACAGGGGAGAGTGTGGGTACCGGTGCCACCGGTGGATCCGGTCGTGACCAC  
ATGGTCCTTCATGAGTACGTAAATGCTGCTGGGATTACAGCAGCTGCATAAGGCGCGCCGACTC

Restriction enzyme for bead release: *AscI*

### **pHisZ\_VEGF\_AG\_mCherry**

Backbone pHisZ: same as for pHisZ\_GFP11

Insert1 VEGF: Same as for pHisZ\_VEGF\_eGFP

Insert2 AG:

**TGTGACAAGCCGAGGGCGGGGCTCAGGATCGGCGCAACACGATGAAGCTCAACAAAATGCTTTTTATCA  
AGTCTTAAATATGCCTAACTTAAATGCTGATCAACGCAATGGTTTTATCCAAAGCCTTAAAGATGATCC  
AAGCCAAAAGTGCTAACGTTTTAGGTGAAGCTCAAAAACCTTAAATGACTCTCAAGCTCCAAAAGCTGATGC  
GCAACAAAATAACTTCAACAAAGATCAACAAAGCGCCTTCTATGAAATCTTGAACATGCCTAACTTAAA  
CGAAGCGCAACGTAACGGCTTCATTCAAAGTCTTAAAGACGACCCAAGCCAAAAGCACTAACGTTTTAGG  
TGAAGCTAAAAAATAAACGAATCTCAAGCACCGAAAGCTGATAACAATTTCAACAAAGAACAACAAA  
ATGCTTTCTATGAAATCTTGAATATGCCTAACTTAAACGAAGAACAACGCAATGGTTTTATCCAAAGCT  
TAAAAGATGACCCAAGCCAAAAGTGCTAACCTATTGTCAGAAGCTAAAAAGTTAAATGAATCTCAAGCA  
CCGAAAGCGGATAACAAATTCACAAAGAACAACAAAATGCTTTCTATGAAATCTTACATTTACCTAA  
CTTAAACGAAGAACAACGCAATGGTTTTATCCAAAGCCTAAAAGATGACCCAAGCCAAAAGCGCTAACCT  
TTTAGCAGAAGCTAAAAAGCTAAATGATGCTCAAGCACCAAAAAGCTGACAACAATTCACAAAGAAC  
AACAAAATGCTTTCTATGAAATTTTACATTTACCTAACTTAACTGAAGAACAACGTAACGGCTTCATCC  
AAAGCCTTAAAGACGATCCTTCGGTGAGCAAAGAAATTTTAGCAGAAGCTAAAAAGCTAAACGATGCT  
CAAGCACCAAAAAGAGGAAGACAATAACAAGCCTATCGAAGGTAGGAATTCGGGGGATCCGTCGATGC  
GTCTGAATTAACACCAGCCGTGACAACCTTACAAACTTGTATTAAATGGTAAAACATTGAAAGGCGAAA  
CAACTACTGAAGCTGTTGATGCTGCTACTGCAGAAAAAGTCTTCAAACAATACGTAACGACAACGGTG  
TTGACGGTGAATGGACTTACGACGATGCGACTAAGACCTTTACAGTTACTGAAAAACCAGAAGTGATC  
GATGCGTCTGAATTAACACCAGCCGTGACAACCTTACAAACTTGTATTAAATGGTAAAACATTGAAAGGC  
GAAACAATACTAAAGCAGTAGACGCAGAAACTGCAGAAAAAGCCTTCAAACAATACGTAACGACAA  
CGGTGTTGATGGTGTGGACTTATGATGATGCGACTAAGACCTTTACGGTAACTGAAATGGTTACAG  
AGGTTCTGGATCTAGTAGC**

Insert3 mCherry:

**ATGGTTACAGAGGTTCTGGATCTAGTAGCATGGTGAGCAAGGGCGAGGAGGATAACATGGCCATCA  
TCAAGGAGTTCATGCGCTTCAAGGTGCACATGGAGGGCTCCGTGAACGGCCACGAGTTTCGAGATCGAGG  
GCGAGGGCGAGGGCCGCCCTACGAGGGCACCCAGACCGCAAGCTGAAGGTGACCAAGGGTGGCCCCC  
TGCCCTTCGCCTGGGACATCCTGTCCCCCAGTTTCATGTACGGCTCCAAGGCCTACGTGAAGCACCCCGC  
CGACATCCCCGACTACTTGAAGCTGTCTTCCCCGAGGGCTTCAAGTGGGAGCGCGTGATGAACTTCGA  
GGACGGCGGGCGTGGTGACCGTGACCCAGGACTCCTCCCTGCAGGACGGCGAGTTTCATCTACAAGGTGAA  
GCTGCGCGGCACCAACTTCCCCCTCCGACGGCCCCGTAATGCAGAAGAAGACCATGGGCTGGGAGGCCTC  
CTCCGAGCGGATGTACCCCGAGGACGGCGCCCTGAAGGGCGAGATCAAGCAGAGGCTGAAGCTGAAGGA  
CGGCGGCCACTACGACGCTGAGGTCAAGACCACCTACAAGGCCAAGAAGCCCGTGCAGCTGCCCCGGCGC  
CTACAACGTCAACATCAAGTTGGACATCACCTCCACAACGAGGACTACACCATCGTGGAACAGTACGA  
ACGCGCCGAGGGCCGCCACTCCACCGGCGGCATGGACGAGCTGTACAAGGGCGGCCGACGACTC**

Restriction enzyme for bead release: *NotI*

## 96 different full length single chains to full-length antibodies heavy

Backbone HerceptinCH\_pcDNA3.3

**CTCGAGGCTAGCACCAAGGGCCCATCGGTCTTCCCCCTGGCACCCCTCCTCCAAGAGCACCTCTGGGGGC**  
ACAGCGGCCCTGGGCTGCCTGGTCAAGGACTACTTCCCCGAACCGGTGACGGTGTCTGTGAACTCAGGC  
GCCCTGACCAGCGCGTGCACACCTTCCCGGCTGTCTACAGTCTCAGGACTCTACTCCCTCAGCAGCG  
TGGTGACCGTGCCTCCAGCAGCTTGGGCACCCAGACCTACATCTGCAACGTGAATCACAAGCCCAGCA  
ACACCAAGGTGGACAAGAAAGTTGAGCCCAAATCTTGCGACAAAACCTCACACATGCCACCCTGCCAG  
CACCTGAACTCCTGGGGGACCGTCAGTCTTCTCTTCCCCCAAACCCAAGGACACCCCTCATGATCTC  
CCGACCCCTGAGGTACATGCGTGGTGGTGGACGTGAGCCACGAAGACCCCTGAGGTCAAGTTCAACTG  
GTACGTGGACGGCGTGGAGGTGCATAATGCCAAGACAAAGCCGCGGGAGGAGCAGTACAACAGCACGT  
ACCGTGTGGTCAGCGTCTCACCGTCTGCACCAGGACTGGCTGAATGGCAAGGAGTACAAGTGAAGG  
TCTCCAACAAAGCCCTCCCAGCCCCATCGAGAAAACCATCTCCAAGCCAAAGGGCAGCCCCGAGAACC  
ACAGGTGTACACCCTGCCCCATCCCGGGATGAGCTGACCAAGAACCAGGTGAGCCTGACCTGCCTGGTC  
AAAGGCTTCTATCCCAGCGACATCGCCGTGGAGTGGGAGAGCAATGGGCAGCCGGAACAACACTACAAG  
ACCACGCCTCCCGTGTGGACTCCGACGGCTCCTTCTTCTCTACAGCAAGCTCACCGTGGACAAGAGCA  
GGTGGCAGCAGGGGAACGTCTTCTCATGCTCCGTGATGCATGAGGCTCTGCACAACCACTACACGCAGA  
AGAGCCTCTCCCTGTCCCCGGTAAATGACTCGAGAAGGGTTTCGATCCCTACCGGTTAGTAATGAGTTT  
AAACGGGGGAGGCTAACTGAAACACGGAAGGAGACAATACCGGAAGGAACCCGCGCTATGACGGCAAT  
AAAAAGACAGAATAAAACGCACGGGTGTTGGGTGTTTTGTTTCATAAACCGGGGTTTCGGTCCCAGGGCT  
GGCACTCTGTGCATACCCACCGAGACCCATTGGGGCAATACGCCCGGTTTTCTTCTTTTCCCACC  
CCACCCCAAGTTCCGGTGAAGGCCAGGGCTCGCAGCCAACGTCCGGGCGGCAGGCCCTGCCATAGCA  
GATCTGCGCAGCTGGGGCTCTAGGGGGTATCCCCACGCGCCCTGTAGCGGCGCATTAAAGCGCGGGGT  
GTGGTGGTTACGCGCAGCGTGACCGCTACACTTGCAGCGCCCTAGCGCCCGCTCCTTTCGCTTCTTCC  
CTTCTTTCTCGCCACGTTCCGCGGCTTTCCCCGTCAAGTCTAAAATCGGGGCATCCCTTTAGGGTTCCG  
ATTTAGTGCTTTACGGCACCTCGACCCAAAAAATTTGATTAGGGTGATGGTTCACGTAGTGGGCCATC  
GCCCTGATAGACGGTTTTTTCGCCCTTTGACGTTGGAGTCCACGTTCTTTAATAGTGGACTCTTGTCCA  
AACTGGAACAACACTCAACCCTATCTCGGTCTATTCTTTTATTATAAGGGATTTTGGGGATTTCCGGC  
CTATTGGTTAAAAATGAGCTGATTTAACAAAAATTTAACGCGAATTAATTCTGTGGAATGTGTGTCA  
GTTAGGGTGTGAAAAGTCCCAGGCTCCCAGCAGGCAGAAGTATGCAAAGCATGCATCTCAATTA  
AGCAACCAGGTGTGAAAAGTCCCAGGCTCCCAGCAGGCAGAAGTATGCAAAGCATGCATCTCAATTA  
GTCAGCAACCATAGTCCCAGCCCTAACTCCGCCCATCCCGCCCCTAACTCCGCCCAGTTCCGCCCATTCTC  
CGCCCCATGGCTGACTAATTTTTTTTTATTTATGCAGAGGCCGAGGCCGCTCTGCCTCTGAGCTATTCCA  
GAAGTAGTGAGGAGGCTTTTTTGGAGGCTAGGCTTTTGCAAAAAGCTCCCGGGAGCTTGTATATCCAT  
TTTTCGGATCTGATCAAGAGACAGGATGAGGATCGTTTCGCATGATTGAACAAGATGGATTGCACGCAG  
GTTCTCCGGCCGCTTGGGTGGAGAGGCTATTCCGCTATGACTGGGCACAACAGACAATCGGCTGCTGTG  
ATGCCGCCGTGTTCCGGCTGTGAGCGCAGGGGCGCCCGGTTCTTTTTGTCAAGACCGACCTGTCCGGTGC  
CCTGAATGAACTGCAGGACGAGGCAGCGCGGCTATCGTGGCTGGCCACGACGGGCGTTCTTTCGCGCAGC  
TGTGCTCGACGTTGTCACTGAAGCGGGAAGGACTGGCTGCTATTGGGCGAAGTGCCGGGGCAGGATCT  
CCTGTCACTACCTTGTCTCTCCGAGAAAGTATCCATCATGGCTGATGCAATGCGGCGGCTGCATAC  
GCTTGTATCCGGCTACCTGCCATTTCGACCACCAAGCGAAACATCGCATCGAGCGAGCAGTACTCGGAT  
GGAAGCCGCTTTGTGATCAGGATGATCTGGACGAAGAGCATCAGGGGCTCGCGCCAGCCGAACTGTT  
CGCCAGGCTCAAGGCGCGCATGCCCGACGGCGAGGATCTCGTCTGACCCATGGCGATGCCTGCTTGCCG  
AATATCATGGTGGAAAATGGCCGCTTTTCTGGATTTCATCGACTGTGGCCGGCTGGGTGTGGCGGACCGC  
TATCAGGACATAGCGTTGGCTACCCGTGATATTGCTGAAGAGCTTGGCGGCGAATGGGCTGACCGCTTC  
CTCGTGCTTTACGGTATCGCCGCTCCCGATTTCGAGCGCATCGCCTTCTATCGCCTTCTTTCAGGATTTCT  
TCTGAGCGGGACTCTGGGGTTCGCGAAAATGACCGACCAAGCGACGCCAACCTGCCATCACGAGATTTCT  
GATTCCACCGCCGCTTCTATGAAAGGTTGGGCTTCGGAATCGTTTTTCCGGGACGCCGGCTGGATGATC  
CTCCAGCGCGGGGATCTCATGCTGGAGTTCTTCGCCACCCCAACTTGTATTGTCAGCTTATAATGGT  
TACAAATAAAGCAATAGCATCACAAATTTACAAATAAAGCATTTTTTTTCACTGCATTTCTAGTTGTGGT  
TTGTCCAAACTCATCAATGTATCTTATCATGTCTGTATACCGTGCACCTCTAGCTAGAGCTTGGCGTAA  
TCATGGTCATAGCTGTTTCTGTGTGAAATTTGTTATCCGCTCACAATTCACACAACATAACGAGCCGGA  
AGCATAAAGTGTAAGCCTGGGGTGCCTAATGAGTGAGCTAACTCACATTAATTGCGTTGCGCTCACTG  
CCCCTTTCCAGTCGGGAAACCTGTCTGCCAGCTGCATTAATGAATCGGCCAACGCGCGGGGAGAGGC  
GGTTTTCGCTATTGGGCGCTTTCGCTTCTCGCTCACTGACTCGCTGCGCTCGGTGCTTCCGGTGCGGC  
GAGCGGTATCAGCTCACTCAAAGGCGGTAATACGGTTATCCACAGAATCAGGGGATAACGCAGGAAAG  
AACATGTGAGCAAAAAGGCCAGCAAAAAGGCCAGGAACCGTAAAAAGGCCGCTTGTGGCGTTTTTCCAT

AGGCTCCGCCCCCTGACGAGCATCACAAAAATCGACGCTCAAGTCAGAGGTGGCGAAACCCGACAGGA  
CTATAAAGATACCAGGCGTTTCCCCTGGAAGCTCCCTCGTGCGCTCTCCTGTTCCGACCCTGCCGCTTA  
CCGGATACCTGTCCGCTTTCTCCCTTCGGGAAGCGTGGCGCTTCTCAATGCTCACGCTGTAGGTATCT  
CAGTTCGGTGTAGGTCGTTGCTCCAAGCTGGGCTGTGTGCACGAACCCCGTTCCAGCCCAGCGTGC  
GCCTTATCCGGTAACTATCGTCTTGAGTCCAACCCGGTAAGACACGACTTATCGCCACTGGCAGCAGCC  
ACTGGTAACAGGATTAGCAGAGCGAGGTATGTAGGCGGTGCTACAGAGTCTTGAAGTGGTGGCCTAA  
CTACGGCTACACTAGAAGGACAGTATTTGGTATCTGCGCTCTGCTGAAGCCAGTTACCTTCGGAAAAAG  
AGTTGGTAGCTCTTGATCCGGCAAACAAACCACCGCTGGTAGCGGTGGTTTTTTTTGTTTGAAGCAGCA  
GATTACGCGCAGAAAAAAGGATCTCAAGAAGATCCTTTGATCTTTTCTACGGGGTCTGACGCTCAGTG  
GAACGAAAACCTCACGTTAAGGGATTTTGGTCATGAGATTATCAAAAAGGATCTTACCTAGATCCTTTT  
AAATTAATAAATGAAGTTTTAAATCAATCTAAAGTATATATGAGTAAACTTGGTCTGACAGTTACCAAT  
GCTTAATCAGTGAGGCACCTATCTCAGCGATCTGTCTATTTTCGTTTCATCCATAGTTGCTGACTCCCCGT  
CGTGTAGATAACTACGATACGGGAGGGCTTACCATCTGGCCCCAGTGCTGCAATGATACCGCGAGACCC  
ACGCTCACCGGCTCCAGATTTATCAGCAATAAACCCAGCCAGCCGGAAGGGCCGAGCGCAGAAGTGGTCC  
TGCAACTTTATCCGCTCCATCCAGTCTATTAATTGTTGCCGGGAAGCTAGAGTAAGTAGTTCCGCAAGT  
TAATAGTTTTGCGCAACGTTGTTGCCATTGCTACAGGCATCGTGGTGTACGCTCGTCTTTGGTATGGC  
TTCATTACGCTCCGGTCCCAACGATCAAGGCGAGTTACATGATCCCCATGTTGTGCAAAAAAGCGGT  
TAGTCTCTTCGGTCTCCGATCGTTGTGAGAAGTAAGTTGGCCGCAAGTGTATCACTCATGGTTATGGC  
AGCACTGCATAATTCTTACTGTCATGCCATCCGTAAGATGCTTTTTCTGTGACTGGTGGTACTCAAC  
CAAGTCATTCTGAGAATAGTGTATGCGGCGACCGAGTTGCTCTTGCCCGCGTCAATACGGGATAATAC  
CGCGCCACATAGCAGAACTTTAAAAGTGTCTCATCTTGGAAAACGTTCTTCGGGGCGAAAACCTCAAG  
GATCTTACCGCTGTTGAGATCCAGTTCGATGTAACCCACTCGTGCACCCAAGTGTCTTCCAGCATCTTT  
TACTTTTACCAGCGTTTCTGGGTGAGCAAAAACAGGAAGGCAAAATGCCGCAAAAAGGGAATAAGGG  
CGACACGGAAATGTTGAATACTCATACTCTTCTTTTTCAATATTATTGAAGCATTATCAGGGTTATT  
GTCTCATGAGCGGATACATATTTGAATGTATTTAGAAAAATAAACAAATAGGGGTTCCGCGCACATTT  
CCCCGAAAAGTGCCACCTGACGTGACGGATCGGGAGATCTCCCGATCCCCTATGGTGCAGTCTCAGTAC  
AATCTGCTCTGATGCCGCATAGTTAAGCCAGTATCTGCTCCCTGCTTGTGTGTTGGAGGTGCTGAGTA  
GTGCGCGAGCAAAAATTAAGCTACAACAAGGCAAGGCTTGACCGACAATTGCATGAAGAATCTGCTTA  
GGGTTAGGCGTTTTGCGCTGCTTCGCGATGTACGGGCCAGATATACGCGTTGACATTGATTATTGACTA  
GTTATTAATAGTAATCAATTACGGGGTCAATTAGTTCATAGCCCATATATGGAGTTCGCGTTACATAAC  
TTACGGTAAATGGCCCGCTGGCTGACCGCCCAACGACCCCCGCCATTGACGTCAATAATGACGTATG  
TTCCCATAGTAACGCCAATAGGGACTTTCCATTGACGTCAATGGGTGGAGTATTTACGGTAAACTGCC  
ACTTGGCAGTACATCAAGTGTATCATATGCCAAGTACGCCCCCTATTGACGTCAATGACGGTAAATGGC  
CCGCTGGCATTATGCCAGTACATGACCTTATGGGACTTTCTACTTGGCAGTACATCTACGTATTAG  
TCATCGCTATTACCATGGTGTATGCGGTTTTGGCAGTACATCAATGGGCGTGGATAGCGGTTTGGACTCAC  
GGGGATTTCCAAGTCTCCACCCCATTTGACGTCAATGGGAGTTTTGTTTTGGCACAAAATCAACGGGACT  
TTCCAAAATGTCGTAACAACCTCCGCCCCATTGACGCAAAATGGGCGGTAGGCGTGTACGGTGGGAGGTCT  
ATATAAGCAGAGCTCGTTTGTAGTGAACCGTCAGATCGCCTGGAGACGCCATCCACGCTGTTTTGACCTCC  
ATAGAAGACACCGGACCGATCCAGCCTCCGGACTCTAGAGGATCGAACCTTATCGATATGGAGACAG  
ACACACTCTGCTATGGGTACTGCTGCT**CTGGGTTCCAGGTTCCACGTGG**

Insert scFv heavy

**CAGCTCCGGACTCTAGAGGATCGAACCCTTGAGGTGCAGCTGTTGGAGAGCGGGGGAGGCTTGGTAC**  
AGCCTGGGGGGTCCCTGCGCCTCTCCTGTGCAGCCAGCGGATTCACCTTTXXXXXXXXXXXXXXXXXXTG  
GGTCCGCCAGGCTCCAGGGAAGGGGCTGGAGTGGGTCTCAGXXXXXXXXXXXXXXXXXXXXXXXXXXXX  
XATGCAGACTCCGTGAAGGGCCGGTTCACCATCTCCCGTACAATTCCAAGAACACGCTGTATCTGCAA  
ATGAACAGCCTGCGTGCCGAGGACACGGCTGTATATTATTGTGCGCGCTXXXXXXXXXXXXXXXXXXTACT  
TTGACTATTGGGGCCAGGGAACCC**TGGTCCAGTCTCCTCAGTAGCCGACTC**

Restriction NheI

## 96 different full length single chains to full-length antibodies light

Backbone HerceptinCL\_pOptivec

**CTCGAGCGTACGGTGGCTGCACCATCTGTCTTCATCTTCCCGCCATCTGATGAGCAGTTGAAATCTGG**  
AACTGCCTCTGTTGTGTGCCTGCTGAATAACTTCTATCCCAGAGAGGCCAAAGTACAGTGGAAGGTGGA  
TAACGCCCTCCAATCGGGTAACTCCCAGGAGAGTGTACAGAGCAGGACAGCAAGGACAGCACCTACAG  
CCTCAGCAGCACCTGACGCTGAGCAAAGCAGACTACGAGAAACACAAAGTCTACGCCTGCGAAGTCAC  
CCATCAGGGCCTGAGTTCGCCCCGTACAAAGAGCTTCAACAGGGGAGAGTGTAACTCGAGAAGGGTTG  
GATCCCTACCGGTGCTGCGGCCGCGCAGTTAACGCCGCCCTCTCCCTCCCCCCCCCTAACGTTACTGG  
CCGAAGCCGCTTGAATAAGGCCGGTGTGCGTTTGTCTATATGTTATTTCCACCATAATTGCCGTCTTT  
TGGCAATGTGAGGGCCCCGAAACCTGGCCCTGTCTTCTTGACGAGCATTCTAGGGGTCTTTCCCCTCTC  
GCCAAAGGAATGCAAGGTCTGTTGAATGTCGTGAAGGAAGCAGTTCCTCTGGAAGCTTCTTGAAGACA  
AACACGTCTGTAGCGACCCTTTCAGGCAGCGGAACCCCCACCTGGCGACAGGTGCCTCTGCGGCCA  
AAAGCCACGTGTATAAGATACACCTGCAAAGGCCGACAAACCCAGTGCCACGTTGTGAGTTGGATAGT  
TGTGAAAAGAGTCAAATGGCTCTCCTCAAGCGTATTCAACAAGGGGCTGAAGGATGCCAGAAGGTACC  
CCATTGTATGGGATCTGATCTGGGGCTCGGTACACATGCTTTACATGTGTTTAGTCGAGGTTAAAAAA  
ACGTCTAGGCCCCCCGAACCACGGGGACGTGGTTTTCTTTGAAAAACACGATGATAATATGGCCACAA  
GATCTGCCACCATGGTTCGACCATTGAACTGCATCGTCGCCGTGTCCAAAATATGGGGATTGGCAAGA  
ACGGAGACCTACCCTGGCCTCCGCTCAGGAACGAGTTCAGTACTTCAAAGAATGACCACAACCTCTT  
CAGTGAAGGTAACAGAATCTGGTGATTATGGGTAGGAAAACCTGGTTCTCCATTCTGAGAAGAAT  
CGACCTTTAAAGGACAGAATTAATATAGTTCTCAGTAGAGAACTCAAAGAACCACCAGGAGGCTCAT  
TTTCTTGCCAAAAGTTTGGATGATGCCTTAAGACTTATTGAACAACCGGAATTGGCAAGTAAAGTAGA  
CATGGTTTGGATAGTCGGAGGCAGTTCGTTTACCAGGAAGCCATGAATCAACCAGGCCACCTCAGACT  
CTTTGTGACAAGGATCATGCAGGAATTTGAAAGTGACACGTTTTTCCCAGAAATTGATTTGGGAAAT  
ATAAATCTCTCCAGAATACCCAGGCGTCTCTGAGGTCCAGGAGGAAAAAGGCATCAAGTATAAGT  
TTGAAGTCTACGAGAAGAAAGACTAAAACCGGTTAGTAATGAGTTTAAACGGGGGAGGCTAACTGAAA  
CACGGAAGGAGACAATACCGGAAGGAACCCGCGCTATGACGGCAATAAAAAGACAGAATAAAACGCAC  
GGGTGTTGGGTGCTTTGTTTATAAACGCGGGGTTTCGGTCCCAGGGCTGGCACTCTGTGATACCCCACC  
GAGACCCCATTTGGGGCAATACGCCCCGTTTTCTTTCCCCACCCCACTAGTTCGGGTGAA  
GGCCAGGGCTCGCAGCAACGTCGGGGCGGCGCCCTGCCATTACCGTCGACCTCAGCTAGAGCTTGTG  
GCGTAATCATGGTCATAGCTGTTTCTGTGTGAAATGTTTATCCGCTCACAATTCACACAACATAACGA  
GCCGGAAGCATAAAGTGTAAAGCCTGGGGTGCCTAATGAGTGAGCTAACTCACATTAATTGCGTTGCGC  
TCACTGCCCGCTTTCCAGTCGGGAAACCTGTCTGTGCCAGCTGCATTAATGAATCGGCCAACGCGGGGG  
AGAGGCGGTTTTGCGTATTGGGCGCTCTTCCGCTTCTCGCTCACTGACTCGCTGCGCTCGGTGCTTGGC  
TGCGGCGAGCGGTATCAGCTCACTCAAAGGCGGTAATACGGTTATCCACAGAATCAGGGGATAACGCAG  
GAAAGAACATGTGAGCAAAGGCCAGCAAAGGCCAGGAACCGTAAAAAGGCCGCGTTGCTGGCGTTTT  
TTCCATAGGCTCCGCCCCCTGACGAGCATCACAAAATCGACGCTCAAGTCAGAGGTGGCGAAACCCG  
ACAGGACTATAAAGATACCAGGCGTTTTCCCCCTGGAAGCTCCCTCGTGCGCTCTCCTGTTCCGACCCTGC  
CGCTTACCGGATACCTGTCCGCTTTCTCCCTTCGGGAAGCGTGGCGTTTTCTCATAGCTCACGCTGTAG  
GTATCTCAGTTCGGTGTAGGTGCTTCCGCTCCAAGCTGGGCTGTGTGCACGAACCCCCGTTACGCCGAC  
CGCTGCGCTTATCCGGTAACTATCGTCTTGAGTCCAACCCGTAAGACACGACTTATCGCCACTGGCA  
GCAGCCACTGGTAACAGGATTAGCAGAGCGAGGTATGTAGGCGGTGCTACAGAGTCTTGAAGTGGTG  
GCCTAACTACGGCTACACTAGAAGAACAGTATTTGGTATCTGCGCTCTGCTGAAGCCAGTTACCTTCGG  
AAAAAGAGTTGGTAGCTCTTGATCCGGCAAACAACCCAGCTGGTAGCGGTTTTTTTTGTTTGAAGCA  
GCAGATTACGCGCAGAAAAAAGGATCTCAAGAAGATCCTTTGATCTTTTCTACGGGTCTGACGCTCA  
GTGGAACGAAAACTCAGTTAAGGGATTTTGGTCATGAGATTATCAAAAAGGATCTTACCTAGATCC  
TTTTAAATTAATAAATGAAGTTTTAAATCAATCTAAAGTATATATGAGTAACTTGGTCTGACAGTTAC  
CAATGCTTAATCAGTGAGGCACCTATCTCAGCGATCTGTCTATTTTCGTTTCTCCATAGTTGCCTGACTC  
CCCCTCGTGTAGATAACTACGATACGGGAGGGCTTACCATCTGGCCCCAGTGTGCAATGATAACGCGA  
GACCCACGCTCACCGCTCCAGATTTATCAGCAATAAACCAGCCAGCCGGAAGGGCCGAGCGCAGAAGT  
GGTCTGCAACTTTATCCGCTCCATCCAGTCTATTAATTGTTGCCGGAAGCTAGAGTAAGTAGTTCCG  
CCAGTTAATAGTTTGCGCAACGTTGTTGCCATTGCTACAGGCATCGTGGTGTACAGCTCGTCTGTTGGT  
ATGGCTTCATTCAGCTCCGGTTCCCAACGATCAAGGCGAGTTACATGATCCCCATGTTGTGCAAAAAA  
GCGGTTAGCTCCTTCGGTCTCCGATCGTTGTGAGAAGTAAGTTGGCCGCGAGTGTATCACTCATGGTT  
ATGGCAGCACTGCATAATTCTCTTACTGTCATGCCATCCGTAAGATGCTTTTCTGTGACTGGTGAGTAC  
TCAACCAAGTCATTCTGAGAATAGTGTATGCGGCGACCGAGTTGCTCTTGCCCGGCGTCAATACGGGAT  
AATACCGCGCCACATAGCAGAATTTAAAAAGTGTCTCATCATTGGAAAACGTTCTTCGGGGCGAAAACCT  
TCAAGGATCTTACCGCTGTTGAGATCCAGTTCGATGTAACCCACTCGTGACCCAACTGATCTTACGCA  
TCTTTTACTTTACCAGCGTTTTCTGGGTGAGCAAAAACAGGAAGGCAAAAATGCCGCAAAAAGGGAAAT  
AAGGGCGACACGGAATGTTGAATACTCATACTTCTCTTTTCAATATTTGAAGCATTATCAGGG  
TTATTGTCTCATGAGCGGATACATATTTGAATGTATTTAGAAAAATAAACAAATAGGGGTTCCGCGCA  
CATTTCCCCGAAAAGTGCCACCTGACGTCGACGGATCGGGAGATCAGTTGACATTGATTATGACTAGT

TATTAATAGTAATCAATTACGGGGTCATTAGTTCATAGCCCATATATGGAGTTCGCGTTACATAACTT  
ACGGTAAATGGCCCGCTGGCTGACCGCCAACGACCCCGCCATTGACGTCAATAATGACGTATGTT  
CCCATAGTAACGCCAATAGGGACTTTCCATTGACGTCAATGGGTGGAGTATTTACGGTAAACTGCCAC  
TTGGCAGTACATCAAGTGTATCATATGCCAAGTACGCCCCATTGACGTCAATGACGGTAAATGGCCC  
GCCTGGCATTATGCCAGTACATGACCTTATGGGACTTTCTACTTGGCAGTACATCTACGTATTAGTC  
ATCGCTATTACCATGGTGTATGCGGTTTTGGCAGTACATCAATGGGCGTGGATAGCGGTTTGACTCACGG  
GGATTTCCAAGTCTCCACCCCATTTGACGTCAATGGGAGTTTTGTTTTGGCACCAAAATCAACGGGACTTT  
CCAAAATGTCGTAACAACCTCCGCCCCATTGACGCAAATGGGCGGTAGGCGTGTACGGTGGGAGGTCTAT  
ATAAGCAGAGCTCGTTTTAGTGAACCGTCAGATCGCCTGGAGACGCCATCCACGCTGTTTTGACCTCCAT  
AGAAGACACCGGGACCGATCCAGCCTCCGGACTCTAGAGGATCCAACCCTTATCGATATGGAGACAGAC  
ACACTCCTGCTATGGGTACTGCTGCT**CTGGGTTCCAGGTTCCACGTGG**

Insert scFv light

**CTGCTGCTCTGGGTTCCAGGTTCCACGTGGGACATCCAGATGACCCAGTCTCCATCCTCCCTGAGCGCA**  
TCTGTAGGAGACCGCGTCACCATCACTTCCGGGCAAGTCAGAGCATTAGCAGCTATTTAAATTTGGTAT  
CAGCAGAAACCAGGGAAAGCCCTAAGCTCCTGATCTATGCTGCATCCAGTTTGCAAAGTGGGGTCCCA  
TCACGTTTTCAGTGGCAGTGGAAAGCGGGACAGATTTCACTCTCACCATCAGCAGTCTGCAACCTGAAGAT  
TTTGCAACTTATTACTGTCAACAGXXXXXXXXXXXXXXXXXXXXACTTTTGGCCAGGG**ACCAAGCTGGAG**  
**ATCAAACGTACGCGACTC**

Restriction enzyme for bead release: BsiWI

## Bispecific antibodies

Backbone Herceptin\_pCDNA3.3

**CTCGAGGGCGCGCCATAACTCGAGAAGGGTTCGATCCCTACCGGTTAGTAATGAGTTTAAACGGGGGA**  
GGCTAACTGAAACACGGAAGGAGACAATACCGGAAGGAACCCGCGCTATGACGGCAATAAAAAGACAG  
AATAAAACGCACGGGTGTTGGGTCGTTTTGTTCAATAACGCGGGGTTTCGGTCCCAGGGCTGGCACTCTGT  
CGATACCCACCGAGACCCCATTTGGGGCAATACGCCCCGCTTTCTTCCTTTTCCCAACCCACCCCA  
AGTTCCGGTGAAGGCCAGGGCTCGCAGCCAACGTCCGGGCGGCAGGCCCTGCCATAGCAGATCTGCGC  
AGCTGGGGCTTAGGGGTTATCCCCACGCGCCCTGTAGCGGCGCATTAAAGCGCGGCGGGTGTGGTGGTT  
ACGGCAGCGTACCGCTACACTTGCCAGCGCCCTAGCGCCCGCTCCTTTCGCTTCTTCCCTTCTTTTC  
TCGCCAGTTTCGCGGCTTTCCCGTCAAGCTCTAAATCGGGGCATCCCTTTAGGGTTCCGATTTAGTGC  
TTTACGGCACCTCGACCCCAAAAAAATTGATTAGGGTGTAGGTTTACGTAAGTGGGACTCTTGTTCAAAATGGAAC  
AACTCAACCCTATCTCGGTCTATTCTTTTTGATTTATAAGGGATTTTGGGGATTTTCGGCCTATTGGTT  
AAAAAATGAGCTGATTTAACAAAAATTTAACGCGAATTAATTCTGTGGAATGTGTGTGAGTTAGGGTG  
TGGAAGTCCCAGGCTCCCAGCAGGCAGAAGTATGCAAAGCATGCATCTCAATTAGTCAGCAACCAG  
GTGTGGAAGTCCCAGGCTCCCAGCAGGCAGAAGTATGCAAAGCATGCATCTCAATTAGTCAGCAAC  
CATAGTCCCGCCCTAACTCCGCCATCCCGCCCTAACTCCGCCAGTTCCGCCATTCTCCGCCCATG  
GCTGACTAATTTTTTTTATTTATGAGAGCCGAGGCCGCTCTGCCTCTGAGCTATTCCAGAAGTAGT  
GAGGAGGCTTTTTTTGGAGGCTAGGCTTTTGCAAAAAGTCCCGGGAGCTTGTATATCCATTTTCGGAT  
CTGATCAAGAGACAGGATGAGGATCGTTTCGCATGATTGAACAAGATGGATTGCACGCAGGTTCTCCGG  
CCGCTTGGGTGGAGAGGCTATTCCGGCTATGACTGGCACAACAGACAATCGGCTGCTCTGATGCCCGG  
TGTTCCGGCTGTCAGCGCAGGGGCGCCGTTCTTTTTGTCAAGACCGACCTGTCCGGTGCCCTGAATG  
AACTGCAGGACGAGGCAGCGGGCTATCGTGGCTGGCCACGACGGGCTTCCCTGCGCAGCTGTGCTCG  
ACGTTGTCACTGAAGCGGAAGGGACTGGCTGCTATTGGGCGAAGTGCCGGGGCAGGATCTCCTGTCAT  
CTCACCTTGCTCCTGCCGAGAAAGTATCCATCATGGCTGATGCAATGCGGCGGCTGCATACGCTTGATC  
CGGCTACCTGCCATTTCGACCACCAAGCGAAACATCGCATCGAGCGAGCACGTACTCGGATGGAAGCCG  
GTCTTGTGATCAGGATGATCTGGACGAAGAGCATCAGGGGCTCGCGCCAGCCGAAGTTCGCCAGGC  
TCAAGGCGCGCATGCCGACGGCGAGGATCTCGTCTGACCCATGGCGATGCCTGCTTCCGAATATCA  
TGGTGGAAAATGGCCGTTTTCTGGATTATCGACTGTGGCCGGCTGGGTGTGGCGGACCGCTATCAGG  
ACATAGCGTTGGCTACCCGTGATATTGCTGAAGAGCTTGGCGGCGAATGGGCTGACCGCTTCTCGTGC  
TTTACGGTATCGCCGCTCCCGATTTCGAGCGCATCGCCTTCTATCGCCTTCTTACGAGTTCTTCTGAGC  
GGGACTCTGGGGTTTCGCGAAAATGACCGACCAAGCGACGCCAACCTGCCATCACGAGATTTTCGATTCCA  
CCGCCGCTTCTATGAAAGGTTGGGCTTCGGAATCGTTTTCCGGGACGCCGGCTGGATGATCCTCCAGC  
CGGGGATCTCATGCTGGAGTTCTTCGCCACCCCAACTGTTTTATTGCAGCTTATAATGGTTACAAAT

AAAGCAATAGCATCACAAATTTACAAATAAAGCATTFTTTTTTCACTGCATTCTAGTTGTGGTTTGTCCA  
AACTCATCAATGTATCTTATCATGTCTGTATACCGTCGACCTCTAGCTAGAGCTTGGCGTAATCATGGT  
CATAGCTGTTTTCTGTGTGAAATTGTTATCCGCTCACAAATCCACACAACATACGAGCCGGAAGCATAA  
AGTGTAAGCCTGGGGTGCCTAATGAGTGAGCTAACTCACATTAATTGCGTTGCGCTCACTGCCCGCTT  
TCCAGTCGGGAAACCTGTCGTGCCAGCTGCATTAATGAATCGGCCAACGCGCGGGGAGAGGCGGTTTGC  
GTATTGGGCGCTCTTCCGCTTCTCGCTCACTGACTCGCTGCGCTCGGTCGTTCCGCTGCGGCGAGCGGT  
ATCAGCTCACTCAAAGGCGGTAATACGGTTATCCACAGAATCAGGGGATAACGCAGGAAAGAATGT  
GAGCAAAAGGCCAGCAAAAGGCCAGGAACCGTAAAAAGGCCGCGTTGCTGGCGTTTTTCCATAGGCTCC  
GCCCCCTGACGAGCATCACAAAAATCGACGCTCAAGTCAGAGGTGGCGAAACCCGACAGGACTATAAA  
GATACCAGGCGTTTTCCCCTGGAAGCTCCCTCGTGCCTCTCCTGTTCCGACCTGCGCTTACCGGATA  
CCTGTCCGCCTTTCTCCCTTCGGGAAGCGTGGCGCTTTCTCAATGCTCACGCTGTAGGTATCTCAGTTCC  
GTGTAGGTCGTTCCGCTCCAAGCTGGGCTGTGTGCACGAACCCCCGTTACGCCCCGACCGCTGCGCCTTAT  
CCGGTAACTATCGTCTTGAGTCCAACCCGGTAAGACACGACTTATCGCCACTGGCAGCAGCCACTGGTA  
ACAGGATTAGCAGAGCGAGGTATGTAGGCGGTGCTACAGAGTTCTTGAAGTGGTGGCCTAACTACGGCT  
ACACTAGAAGGACAGTATTTGGTATCTGCGCTCTGCTGAAGCCAGTTACCTTCGGAAAAAGAGTTGGTA  
GCTCTTGATCCGGCAAACAAACCACCGCTGGTAGCGGTGGTTTTTTTTGTTTTGCAAGCAGCAGATTACGC  
GCAGAAAAAAAGGATCTCAAGAAGATCCTTTGATCTTTTCTACGGGGTCTGACGCTCAGTGGAAACGAA  
AACTCACGTTAAGGGATTTTGGTCATGAGATTATCAAAAAGGATCTTCACCTAGATCCTTTTAAATTA  
AAATGAAGTTTTAAATCAATCTAAAGTATATATGAGTAAACTTGGTCTGACAGTTACCAATGCTTAAT  
CAGTGAGGCACCTATCTCAGCGATCTGTCTATTTGTTTCCATCATAGTTGCCTGACTCCCCGTCGTGTAG  
ATAACTACGATACGGGAGGGCTTACCATCTGGCCCCAGTGTGCAATGATACCGCGAGACCCACGCTCA  
CCGGCTCCAGATTTATCAGCAATAAACCAGCCAGCCGGAAGGGCCGAGCGCAGAAGTGGTCTGCAACT  
TTATCCGCCTCCATCCAGTCTATTAATTGTTGCCGGGAAGCTAGAGTAAGTAGTTCGCCAGTTAATAGT  
TTGCGCAACGTTGTTGCCATTGCTACAGGCATCGTGGTGTACGCTCGTCTGTTGGTATGGCTTCATTC  
AGCTCCGTTCCCAACGATCAAGGCGAGTTACATGATCCCCATGTTGTGCAAAAAAGCGGTTAGCTCC  
TTCGGTCTCCGATCGTTGTGAGAAGTAAGTTGGCCGAGTGTATCACTCATGGTTATGCGCAGACTG  
CATAATCTCTTACTGTATGCCATCCGTAAGATGCTTTTTCTGTGACTGGTGAGTACTCAACCAAGTCA  
TTCTGAGAATAGTGTATGCGGCGACCGAGTTGCTCTTCCCCGGCGTCAATACGGGATAATACCGCGCCA  
CATAGCAGAACTTTAAAAGTGTCTCATCTTGGAAAACGTTCTTCGGGGCGAAAACCTCTCAAGGATCTTA  
CCGCTGTTGAGATCCAGTTCGATGTAACCCACTCGTGCACCCAACTGATCTTCAGCATCTTTTACTTTCA  
CCAGCGTTTTCTGGGTGAGCAAAAAACAGGAAGGCAAAATGCCGCAAAAAAGGGAATAAGGGCGACACGG  
AAATGTTGAATACTCATACTCTTCCTTTTTCAATATTATTGAAGCATTATCATAGGGTTATTGTCTCATG  
AGCGGATACATATTTGAATGTATTTAGAAAAATAAACAAATAGGGGTTCCGCGCACATTTCCCCGAAA  
AGTGCCACCTGACGTGACGGATCGGGAGATCTCCCGATCCCCTATGGTTCGACTCTCAGTACAATCTGC  
TCTGATGCCGCATAGTTAAGCCAGTATCTGCTCCCTGCTTGTGTGTTGGAGGTCGCTGAGTAGTGCGCG  
AGCAAAATTTAAGCTACAACAAGGCAAGGCTTGACCGACAATTGCATGAAGAATCTGCTTAGGGTTAG  
GCGTTTTGCGCTGCTTCCGATGTACGGGCCAGATATACGCGTTGACATTGATTATTGACTAGTTATTA  
ATAGTAATCAATTACGGGGTCATTAGTTCATAGCCATATATGGAGTTCGCGGTTACATAACTTACGGT  
AAATGGCCCGCCTGGCTGACCGCCCAACGACCCCGCCCATTGACGTCAATAATGACGTATGTTCCATA  
GTAACGCCAATAGGGACTTTCCATTGACGTCAATGGGTGGAGTATTTACGGTAAACTGCCACTTGGCA  
GTACATCAAGTGTATCATATGCCAAGTACGCCCTATTGACGTCAATGACGGTAAATGGCCCGCCTGG  
CATTATGCCCAGTACATGACCTTATGGGACTTTCTACTTGGCAGTACATCTACGTATTAGTCATCGCT  
ATTACCATGGTGTATGCGGTTTTGGCAGTACATCAATGGGCGTGGATAGCGGTTTACTCACGGGGATTT  
CCAAGTCTCCACCCCATTTGACGTCAATGGGAGTTTTGTTTTGGCACAAAATCAACGGGACTTTCCAAAA  
TGTCGTAACAACCTCCGCCCCATTGACGCAAAATGGGCGGTAGGCGTGTACGGTGGGAGGTCTATATAAG  
AGAGCTCGTTTTAGTGAACCGTCAGATCGCCTGGAGACGCCATCCACGCTGTTTTGACCTCCATAGAAGA  
CACCGGGACCGATCCAGCCTCCGGACTCTAGAGGATCGAACCCTTATCGATATGGAGACAGACACTC  
CTGCTATGGGTACTGCTGCTCTGGGTTCCAGGTTCCACGTGGGAGGTGCAGCTCGTTGAAAGCGGTGGC  
GGGCTGGTGCAGCCCGGCGGATCCTTGAGACTTTCATGTGCAGCCTCCGGCTTTAACATCAAAGACACC  
TATATTTCACTGGGTGAGACAGGCCCCAGGGAAGGGCCTGGAATGGGTGCGTAGAATTTACCCTACAAAC  
GGTTATACCCGGTATGCCGATAGTGTAAAAGGACGATTTACAATCTCTGCCGACACTTCTAAGAATACT  
GCATATCTGCAGATGAATTTCTCTGCGCGCTGAGGATACTGCTGTGTACTACTGCTCAAGGTGGGGCGGG  
GACGGATTCTACGCTATGGATTACTGGGGTCAAGGAACACTGGTGACCGTTAGTAGCGCTAGCACCAG  
GGCCATCGGTCTTCCCCTGGCACCTCTCCAAGAGCACCTCTGGGGGCACAGCGGCCCTGGGCTGCC  
TGGTCAAGGACTACTTTCCCGAACCGGTGACGGTGTGCTGGAACCTCAGGCGCCCTGACCAGCGGCTGC  
ACACCTTCCCAGCTGTCTACAGTCTCAGGACTCTACTCCCTCAGCAGCGTGGTGACCGTGCCCTCCAG  
CAGCTTGGGCACCCAGACCTACATCTGCAACGTGAATCAAAAGCCAGCAACACCAAGGTGGACAAGAA  
AGTTGAGCCCAATCTTGCACAAAACCTCACACATGCCACCGTGCCAGCACCTGAACTCCTGGGGGG  
ACCGTCAGTCTTCTCTTCCCCCAAAACCAAGGACACCCTCATGATCTCCCGGACCCCTGAGGTCACA

TGCGTGGTGGTGGACGTGAGCCACGAAGACCCTGAGGTCAAGTCAACTGGTACGTGGACGGCGTGGAG  
GTGCATAATGCCAAGACAAAGCCGCGGGAGGAGCAGTACAACAGCACGTACCGTGTGGTCAGCGTCCTC  
ACCGTCTGCACCAGGACTGGCTGAATGGCAAGGAGTACAAGTGAAGGTCTCAACAAAGCCCTCCA  
GCCCCATCGAGAAAACCATCTCAAAGCCAAAGGGCAGCCCCGAGAACCACAGGTGTACACCCTGCCC  
CCATCCCGGGATGAGCTGACCAAGAACCAGGTCAGCCTGACCTGCCTGGTCAAAGGCTTCTATCCCAGC  
GACATCGCCGTGGAGTGGGAGAGCAATGGGCAGCCGGAGAACAACACTACAAGACCACGCCTCCCGTGTG  
GACTCCGACGGCTCCTTCTTCTCTACAGCAAGCTCACCGTGGACAAGAGCAGGTGGCAGCAGGGGAAC  
GTCTTCTCATGCTCCGTGATGCATGAGGCTCTGCACAACCACTACACGCAGAAG**GAGCCTCTCCCTGTCC**  
**CCGGGTAAA**

4 amino acid linker to binder 1 for heavy chain

CAGAAGAGCCTCTCCCTGTCCCCGGGTAAAXXXXXXXXXXXXXCTGGCCGAGGCCAAGGTGCTGGCCAACA  
GG

15 amino acid linker to binder 1 for heavy chain

CAGAAGAGCCTCTCCCTGTCCCCGGGTAAAXXXXXXXXXXXXXXXXXXXXXXXXXXXXXXXXXXXXXXXXXXX  
XXXXCTGGCCGAGGCCAAGGTGCTGGCCAACAGG

18 amino acid linker to binder 1 for heavy chain

CAGAAGAGCCTCTCCCTGTCCCCGGGTAAAXXXXXXXXXXXXXXXXXXXXXXXXXXXXXXXXXXXXXXXXXXX  
XXXXXXXXXXXXCTGGCCGAGGCCAAGGTGCTGGCCAACAGG

4 amino acid linker to binder 2 for heavy chain

CAGAAGAGCCTCTCCCTGTCCCCGGGTAAAXXXXXXXXXXXXXGTGGACAACAAGTTCAACAAGGAGATG  
TGG

15 amino acid linker to binder 2 for heavy chain

CAGAAGAGCCTCTCCCTGTCCCCGGGTAAAXXXXXXXXXXXXXXXXXXXXXXXXXXXXXXXXXXXXXXXXXXX  
XXXXGTGGACAACAAGTTCAACAAGGAGATGTGG

18 amino acid linker to binder 2 for heavy chain

CAGAAGAGCCTCTCCCTGTCCCCGGGTAAAXXXXXXXXXXXXXXXXXXXXXXXXXXXXXXXXXXXXXXXXXXX  
XXXXXXXXXXXXGTGGACAACAAGTTCAACAAGGAGATGTGG

4 amino acid linker to binder 3 for heavy chain

CAGAAGAGCCTCTCCCTGTCCCCGGGTAAAXXXXXXXXXXXXXGTGGACAACAAGTTCAACAAGGAGGGC  
TTC

15 amino acid linker to binder 3 for heavy chain

CAGAAGAGCCTCTCCCTGTCCCCGGGTAAAXXXXXXXXXXXXXXXXXXXXXXXXXXXXXXXXXXXXXXXXXXX  
XXXXGTGGACAACAAGTTCAACAAGGAGGGCTTC

18 amino acid linker to binder 3 for heavy chain

CAGAAGAGCCTCTCCCTGTCCCCGGGTAAAXXXXXXXXXXXXXXXXXXXXXXXXXXXXXXXXXXXXXXXXXXX  
XXXXXXXXXXXXGTGGACAACAAGTTCAACAAGGAGGGCTTC



Backbone: Herceptin\_pOptivec

**CTCGAGGGCGCGCCATAACTCGAGAAGGGTTGGATCCCTACCGGTGCTGCGGCCGCGCAGTTAACGCC**  
GCCCCTCTCCCTCCCCCCCCCTAACGTTACTGGCCGAAGCCGCTTGAATAAAGCCGGTGTGCGTTTGT  
CTATATGTTATTTTCCACCATATTGCCGTCTTTTGGCAATGTGAGGGCCCGAAACCTGGCCCTGTCTT  
CTTGACGAGCATTCTAGGGGTCTTTCCCCTCTCGCCAAAGGAATGCAAGGTCTGTTGAATGTCGTGAA  
GGAAGCAGTTCTCTGGAAGCTTCTTGAAGACAAACAACGTCTGTAGCGACCTTTGCAGGCAGCGGAA  
CCCCCACCTGGCGACAGGTGCCTCTGCGGCCAAAAGCCACGTGTATAAGATACACCTGCAAAGGCGGC  
ACAACCCAGTGCCACGTTGTGAGTTGGATAGTTGTGGAAAGAGTCAAATGGCTCTCCCTCAAGCGTATT  
CAACAAGGGGCTGAAGGATGCCAGAAAGTACCCATTGTATGGGATCTGATCTGGGGCTCGGTACAC  
ATGCTTTACATGTGTTTGTAGTCGAGGTTAAAAAACGTCTAGGCCCCCCGAACCACGGGGACGTGGTTTT  
CCTTTGAAAAACACGATGATAATATGGCCACAAGATCTGCCACCATGGTTCGACCATTGAACTGCATCG  
TCGCCGTGTCCAAAATATGGGGATTGGCAAGAACGGAGACCTACCCTGGCCTCCGCTCAGGAACGAGT  
TCAAGTACTTCCAAAGAATGACCACAACCTCTTCAGTGGAAGGTAACAGAATCTGGTGATTATGGGT  
AGGAAAACCTGGTTCTCCATTCTGAGAAGAATCGACCTTTAAAGGACAGAATTAATATAGTTCTCAGT  
AGAGAACTCAAAGAACCACCACGAGGAGCTCATTTTCTTGCCAAAAGTTTGGATGATGCCTTAAGACTT  
ATTGAACAACCGGAATTGGCAAGTAAAGTAGACATGGTTTGGATAGTCGGAGGCAGTTCTGTTTACCA  
GGAAGCCATGAATCAACCAGGCCACCTCAGACTCTTTGTGACAAGGATCATGCAGGAATTTGAAAGTGA  
CACGTTTTTCCAGAAATTGATTTGGGGAAATATAAACTTCTCCAGAATACCCAGGCGTCTCTCTGA  
GGTCCAGGAGGAAAAAGGCATCAAGTATAAGTTTGAAGTCTACGAGAAGAAAGACTAAAACCGGTTAG  
TAATGAGTTTAAACGGGGGAGGCTAACTGAAACACGGAAGGAGACAATACCGGAAGGAACCCGCGCTA  
TGACGGCAATAAAAAGACAGAATAAAAACGCACGGGTGTTGGGTGCTTTGTTTATAAACGGGGGTTCC  
GTCCACGGGCTGGCACTCTGTGATAACCCACCGAGACCCCAATGGGGCCAATACGCCCGCTTTCTTCC  
TTTTCCCCACCCACCCCAAGTTCGGGTGAAGCCAGGGCTCGCAGCCAACGTCGGGGCGGCAGGCC  
CTGCCATTACCGTCGACCTCTAGCTAGAGCTTGGCGTAATCATGGTCATAGCTGTTTCTGTGTGAAAT  
TGTTATCCGCTCACAATTCACACAACATACGAGCCGGAAGCATAAAGTGTAAGCCCTGGGTGCCTAA  
TGAGTGAGCTAACTCACATTAATTGCGTTGCGCTCACTGCCCGCTTTCAGTCGGGAAACCTGTGCTGC  
CAGCTGCATTAATGAATCGGCCAACCGCGGGGAGAGCGGTTTGGGTATTGGGCGCTTTCGCTTCC  
TCGCTCACTGACTCGCTGCGCTCGGTGCTTGGCTGCGGCGAGCGGTATCAGCTCAAGGGCGGTA  
ATACGGTTATCCACAGAATCAGGGGATAACGCGAGGAAAGAACATGTGAGCAAAAGGCCAGCAAAAGGC  
CAGGAACCGTAAAAAGGCCGCTTGGTGGCGTTTTTCCATAGGCTCCGCCCCCTGACGAGCATCACAA  
AAATCGACGCTCAAGTCAGAGGTGGCGAAACCCGACAGGACTATAAAGATACCAGGCGTTTCCCCCTGG  
AAGCTCCCTCGTGCCTCTCCTGTTCCGACCTGCCGTTACCGGATACCTGTCCGCTTTTCTCCCTTCG  
GGAAGCGTGGCGTTTTCTCATAGCTCACGCTGTAGGTATCTCAGTTCCGGTGTAGGTGCTTCCGCTCCAAG  
CTGGGCTGTGTGCACGAACCCCGTTCCAGCCGACCGCTGCGCCTTATCCGGTAACTATCGTCTTGAGT  
CCAACCCGGTAAGACACGACTTATCGCCACTGGCAGCAGCCACTGGTAACAGGATTAGCAGAGCGAGGT  
ATGTAGGCGGTGTACAGAGTTCTTGAAGTGGTGGCCTAACTACGGCTACACTAGAAGAACAGTATTTG  
GTATCTGCGCTCTGCTGAAGCCAGTTACCTTCGAAAAAGAGTTGGTAGCTCTTGATCCGGCAAAACAAA  
CCACCGCTGGTAGCGTTTTTTTTGTTTGAAGCAGCAGATTACGCGCAGAAAAAAGGATCTCAAGAAG  
ATCCTTTGATCTTTTCTACGGGTCTGACGCTCAGTGAACGAAAACTCAGTTAAGGGATTTTGGTCA  
TGAGATTATCAAAAAGGATCTTCACCTAGATCTTTTAAATTAATAAATGAAGTTTTAAATCAATCTAA  
AGTATATATGAGTAAACTTGGTCTGACAGTTACCAATGCTTAATCAGTGAGGCACCTATCTCAGCGATC  
TGTCTATTTGTTTCTCCATAGTTGCCTGACTCCCCGTCGTGTAGATAACTACGATACGGGAGGGCTTA  
CCATCTGGCCCCAGTGCTGCAATGATACCGCGAGACCCACGCTCACCGGCTCCAGATTTATCAGCAATA  
AACCAGCCAGCCGGAAGGGCCGAGCGCAGAAGTGGTCTGCAACTTTATCCGCTCCATCCAGTCTATT  
AATTGTTGCCGGGAAGCTAGAGTAAGTAGTTCGCCAGTTAATAGTTTGGCAACGTTGTTGCCATTGCT  
ACAGGCATCGTGGTGTACGCTCGTCTGTTGGTATGGCTTCACTCAGCTCCGGTCCCAACGATCAAGG  
CGAGTTACATGATCCCCATGTTGTGCAAAAAAGCGGTTAGCTCCTTCGGTCTCCGATCGTTGTGAGA  
AGTAAGTTGGCCGCGAGTGTATCACTCATGGTTATGGCAGCACTGCATAATTCTCTTACTGTGATGCCA  
TCCGTAAGATGCTTTTCTGTGACTGGTGTGACTCAACCAAGTCATTCTGAGAATAGTGTATGCGGCCGA  
CCGAGTTGCTCTTGGCCGGCGTCAATACGGGATAATACCGCGCCACATAGCAGAACTTTAAAAGTGCTC  
ATCATTGGAAAAAGTTCTTTCGGGGCGAAAACTCTCAAGGATCTTACCCTGTTGAGATCCAGTTTCGATG  
TAACCCACTCGTGCACCCAAGTATCTTACGATCTTTTACTTTTACCAGCGTTTCTGGGTGAGCAAAA  
ACAGGAAGGCAAAATGCCGCAAAAAAGGGAATAAGGGCGACACGGAAATGTTGAATACTCATACTCTT  
CCTTTTTCAATATTATTGAAGCATTATCAGGGTATTGTCATGAGCGGATACATATTTGAATGTAT  
TTAGAAAAATAACAAATAGGGTTCCGCGCACATTTCCCCGAAAAGTGCCACCTGACGTCGACGGATC  
GGGAGATCAGTTGACATTGATTATTGACTAGTTATTAATAGTAATCAATTACGGGGTCAATTAGTTTAT

AGCCCATATATGGAGTTCGCGTTACATAACTTACGGTAAATGGCCCGCTGGCTGACCGCCCAACGAC  
CCCCGCCATTGACGTCAATAATGACGTATGTTCCCATAGTAACGCCAATAGGGACTTTCATTGACGT  
CAATGGGTGGAGTATTTACGGTAAACTGCCACTTGGCAGTACATCAAGTGTATCATATGCCAAGTACG  
CCCCCTATTGACGTCAATGACGGTAAATGGCCCGCTGGCATTATGCCAGTACATGACCTTATGGGAC  
TTTCCTACTTGGCAGTACATCTACGTATTAGTCATCGCTATTACCATGGTGATGCGGTTTTGGCAGTAC  
ATCAATGGGCGTGGATAGCGGTTGACTCACGGGGATTTCCAAGTCTCCACCCCATTTGACGTCAATGGG  
AGTTTGTGTTTGGCACAAAATCAACGGGACTTTCAAAATGTCGTAACAACTCCGCCCCATTGACGCAA  
ATGGGCGGTAGGCGTGTACGGTGGGAGTCTATATAAGCAGAGCTCGTTTAGTGAACCGTCAGATCGCC  
TGGAGACGCCATCCACGCTGTTTTGACCTCCATAGAAGACACCGGGACCGATCCAGCCTCCGGACTCTA  
GAGGATCCAACCCTTATCGATATGGAGACAGACACTCCTGCTATGGGTAAGTCTGCTCTGGGTTCCA  
GGTTCCACGTGGGATATTAGATGACGCGAGTCTCCCTCCTCCCTCAGTGCTTCCGTGGGAGATAGGGTT  
ACTATTACCTGCCGGCCTCTCAAGACGTCAACACTGCAGTAGCCTGGTATCAGCAGAAGCCTGGTAAA  
GCCCCAAAAGTCTGATCTACAGCGCAAGTTTCTTGTACTCCGGGGTGCCTCTAGATTTAGCGGCTCA  
CGATCTGGAACAGACTTTACACTGACCATCAGCTCACTTCAGCCAGAGGACTTCGCTACCTATTACTGT  
CAACAGCACTATAACACACCTCCCACATTTGGCCAGGGTACTAAGGTGGAAATAAAGCGTACGGTGGCT  
GCACCATCTGTCTTCATCTTCCC GCCATCTGATGAGCAGTTGAAATCTGGAAGTGCCTCTGTTGTGTGCC  
TGCTGAATAACTTCTATCCCAGAGAGGCCAAAAGTACAGTGGAAAGTGGATAACGCCCTCCAATCGGGTA  
ACTCCCAGGAGAGTGTACAGAGCAGGACAGCAAGGACAGCACCTACAGCCTCAGCAGCACCTGACGC  
TGAGCAAAGCAGACTACGAGAAACAAAAGTCTACGCCTGCGAAGTCACCCATCAGGGCCTGAGTTTCGC  
CCGTCAAAAGAGCTTCAACAGGGGAGAGTGT

4 amino acid linker to binder 1 for light chain

GTCACAAAGAGCTTCAACAGGGGAGAGTGTXXXXXXXXXXXXXCTGGCCGAGGCCAAGGTGCTGGCCAAC  
AGG

15 amino acid linker to binder 1 for light chain

GTCACAAAGAGCTTCAACAGGGGAGAGTGTXXXXXXXXXXXXXXXXXXXXXXXXXXXXXXXXXXXXXXXXXXXXX  
XXXXXCTGGCCGAGGCCAAGGTGCTGGCCAACAGG

18 amino acid linker to binder 1 for light chain

GTCACAAAGAGCTTCAACAGGGGAGAGTGTXXXXXXXXXXXXXXXXXXXXXXXXXXXXXXXXXXXXXXXXXXXXX  
XXXXXXXXXXXXXXXXCTGGCCGAGGCCAAGGTGCTGGCCAACAGG

4 amino acid linker to binder 2 for light chain

GTCACAAAGAGCTTCAACAGGGGAGAGTGTXXXXXXXXXXXXXGTGGACAACAAGTTCAACAAGGAGATG  
TGG

15 amino acid linker to binder 2 for light chain

GTCACAAAGAGCTTCAACAGGGGAGAGTGTXXXXXXXXXXXXXXXXXXXXXXXXXXXXXXXXXXXXXXXXXXXXX  
XXXXXGTGGACAACAAGTTCAACAAGGAGATGTGG

18 amino acid linker to binder 2 for light chain

GTCACAAAGAGCTTCAACAGGGGAGAGTGTXXXXXXXXXXXXXXXXXXXXXXXXXXXXXXXXXXXXXXXXXXXXX  
XXXXXXXXXXXXXXXXGTGGACAACAAGTTCAACAAGGAGATGTGG

4 amino acid linker to binder 3 for light chain

GTCACAAAGAGCTTCAACAGGGGAGAGTGTXXXXXXXXXXXXXGTGGACAACAAGTTCAACAAGGAGGGC  
TTC

15 amino acid linker to binder 3 for light chain

GTCACAAAGAGCTTCAACAGGGGAGAGTGTXXXXXXXXXXXXXXXXXXXXXXXXXXXXXXXXXXXXXXXXXXXXXXXXXXXXX  
XXXXXGTGGACAACAAGTTCAACAAGGAGGGCTTC

18 amino acid linker to binder 3 for light chain

GTCACAAAGAGCTTCAACAGGGGAGAGTGTXXXXXXXXXXXXXXXXXXXXXXXXXXXXXXXXXXXXXXXXXXXXXXXXXXXXX  
XXXXXXXXXXXXXXXXXGTGGACAACAAGTTCAACAAGGAGGGCTTC

Binder 1

CTGGCCGAGGCCAAGGTGCTGGCCAACAGGXXXXXXXXXXXXXXXXXXXXXXXXXXXXXXXXXXXXXXXXXXXXXXXXXXXX  
XXXXXXXXXXXXXXXXXXXXXXXXXXXXXXXXXXXXXXXXXXXXXXXXXXXXXXXXXXXXXXXXXXXXXXXXXXXXXXXXXXXXGG  
CGCGCCACGACTC

Restriction enzyme for bead release: *AscI*

Binder 2

GTGGACAACAAGTTCAACAAGGAGATGTGGXXXXXXXXXXXXXXXXXXXXXXXXXXXXXXXXXXXXXXXXXXXXXXXXXXXX  
XXXXXXXXXXXXXXXXXXXXXXXXXXXXXXXXXXXXXXXXXXXXXXXXXXXXXXXXXXXXXXXXXXXXXXXXXXXXXXXXXXXX  
XXXXXXXXXXXXXXXXXXXXXXXXXXXXXXXXXXXXXXXXXXXXXXXXXXXXXXXXXXXXXXXXXXXXXXXXXXXXXXXXXXXX  
XXXXXXXXXXXXXXXXXXXXXXXXXXXXXXXXXXXXXXXXXXXXXXXXXXXXXXXXXXXXXXXXXXXXXXXXXXXXXXXXXXXX  
XXXXXXXXXXXXXXXXXXXXXXXXXXXXXXXXXXXXXXXXXXXXXXXXXXXXXXXXXXXXXXXXXXXXXXXXXXXXXXXXXXXX  
XXXXXXXXXXXXXXXXXXXXTAAGGCGCGCCACGACTC

Restriction enzyme for bead release: *AscI*

Binder 3

GTGGACAACAAGTTCAACAAGGAGGGCTTCXXXXXXXXXXXXXXXXXXXXXXXXXXXXXXXXXXXXXXXXXXXXXXXXXXXX  
XXXXXXXXXXXXXXXXXXXXXXXXXXXXXXXXXXXXXXXXXXXXXXXXXXXXXXXXXXXXXXXXXXXXXXXXXXXXXXXXXXXX  
XXXXXXXXXXXXXXXXXXXXXXXXXXXXXXXXXXXXXXXXXXXXXXXXXXXXXXXXXXXXXXXXXXXXXXXXXXXXXXXXXXXX  
XXXXXXXXXXXXXXXXXXXXXXXXXXXXXXXXXXXXXXXXXXXXXXXXXXXXXXXXXXXXXXXXXXXXXXXXXXXXXXXXXXXX  
XXXXXXXXXXXXXXXXXXXXXXXXXXXXXXXXXXXXXXXXXXXXXXXXXXXXXXXXXXXXXXXXXXXXXXXXXXXXXXXXXXXX  
XXXXXXXXXXXXXXXXXXXXTAAGGCGCGCCACGACTC

Restriction enzyme for bead release: *AscI*

## Vector assembly

### pHisZamp

Backbone: amp resistance

***CTCGAGGCGGCCGATAACGCCGGTCGCTACCATTACCAACTTGTCTGGTGTCAAAAATAATAGGCCT  
ACTAGTCGGCCGTACGGGCCCTTTTCGTCTCGCGCGTTTCGGTGATGACGGTGAAAACCTCTGACACATG  
CAGCTCCCGGAGACGGTCACAGCTTGTCTGTAAGCGGATGCCGGGAGCAGACAAGCCGTCAGGGCGCG  
TCAGCGGGTGTGGCGGGTGTGGGGCTGGCTTAACTATGCGGCATCAGAGCAGATTGTACTGAGAGTG  
CACCATATGCGGTGTGAAATACCGCACAGATGCGTAAGGAGAAAATACCGCATCAGGCGGCCTTAAGGG  
CCTCGTGATACGCCTATTTTTATAGGTTAATGTCATGATAATAATGGTTTCTTAGACGTCAGGTGGCAC  
TTTTTCGGGAAATGTGCGCGGAACCCCTATTTGTTTATTTTTCTAAATACATTCAAATATGTATCCGCT  
CATGAGACAATAACCCTGATAAATGCTTCAATAATATTGAAAAAGGAAGAGTATGAGTATTCAACATT  
TCCGTGTCGCCCTTATCCCTTTTTGCGGCATTTTGCCTTCCTGTTTTGCTCACCCAGAAACGCTGGT  
GAAAGTAAAAGATGCTGAAGATCAGTTGGGTGCACGAGTGGGTTACATCGAACTGGATCTCAACAGCG  
GTAAGATCCTTGAGAGTTTTGCCCCGAAGAACGTTTTCCAATGATGAGCACTTTTAAAGTTCTGCTAT***

GTGGCGGGTATTATCCCGTATTGACGCCGGGCAAGAGCAACTCGGTCGCCGCATACACTATTCTCAGA  
ATGACTTGGTTGAGTACTCACCAGTCACAGAAAAGCATCTTACGGATGGCATGACAGTAAGAGAATTA  
TGCAGTGCTGCCATAACCATGAGTGATAAACTGCGGCCAACTTACTTCTGACAACGATCGGAGGACCG  
AAGGAGCTAACCGCTTTTTTGCACAACATGGGGGATCATGTAACCTCGCCTTGATCGTTGGGAACCGGAG  
CTGAATGAAGCCATAACAAACGACGAGCGTGACACCACGATGCCTGTAGCAATGGCAACAACGTTGCGC  
AACTATTAACCTGGCGAACTACTTACTCTAGCTTCCCGGCAACAATTAATAGACTGGATGGAGGCGGAT  
AAAGTTGCAGGACCACTTCTGCGCTCGGCCCTTCCGGCTGGCTGGTTTATTGCTGATAAATCTGGAGCC  
GGTGAGCGTGGGTCTCGCGGTATCATTGCAGCACTGGGGCCAGATGGTAAGCCCTCCCGTATCGTAGTT  
ATCTACACGACGGGGAGTCAGGCAACTATGGATGAACGAAATAGACAGATCGCTGAGATAGGTGCCTC  
ACTGATTAAGCATTGGTAACCTGTCAGACCAAGTTTACTCATATATACTTTAGATTGATTTAAAACCTCA  
TTTTTAATTTAAAAGGATCTAGGTGAAGATCCTTTTTGATAATCTCATGACCAAAATCCCTTAACGTC  
**AGTTTTCGTTCCACTGAGCG**

Insert 1: Origin of replication

**CCTTAACGTGAGTTTTCGTTCCACTGAGCGTCAGACCCCGTAGAAAAGATCAAAGGATCTTCTTGAGA**  
TCCTTTTTTCTGCGCGTAATCTGCTGCTTGCAAACAAAAAAACCACCGCTACCAGCGGTGGTTTTGTTT  
GCCGGATCAAGAGCTACCAACTCTTTTTCCGAAGGTAACCTGGCTTCAGCAGAGCGCAGATACCAAATAC  
TGTCCTTCTAGTGTAGCCGTAGTTAGGCCACCACTTCAAGAACTCTGTAGCACCAGCTACATACCTCGCT  
CTGCTAATCCTGTTACCAGTGGCTGCTGCCAGTGGCGATAAGTCGTGTCTTACCGGGTTGGACTCAAGA  
CGATAGTTACCGGATAAGGCGCAGCGGTCCGGCTGAACGGGGGGTTTCGTGCACACAGCCAGCTTGGAG  
CGAACGACCTACACCGAACTGAGATACCTACAGCGTGAGCTATGAGAAAGCGCCACGCTTCCGAAGGG  
AGAAAGGCGGACAGGTATCCGGTAAGCGGCAGGGTCGGAACAGGAGAGCGCACGAGGGAGCTTCCAGG  
GGGAAACGCCTGGTATCTTTATAGTCTGTCCGGTTTCGCCACCTCTGACTTGAGCGTCGATTTTTGTG  
ATGCTCGTCAGGGGGGCGGAGCCTATGGAAAAACGCCAGCAACGCGGCCCTTTTACGGTTCCTGGCCTT  
TTGCTGGCCTTTTGCTCACATGTTCTTTCTGCGTTATCCCTGATTCTGTGGATAACCGTATTACCGCC  
TTTGAGTGAGCTGATACCGCTCGCCGCAGCCGAACGACCGAGCGCAGCGAGTCAGTGAGCGAGGAAGCG  
GAAGAGCGCCCAATACGCAAACCGCCTCTCCCGCGCGTTGGCCGATT**CATTAATGCAGCTGGCAC**

Insert 2: Lac promoter

**CGTTGGCCGATTCAATTAATGCAGCTGGCAGCAGAGGTTTCCCGACTGGAAAAGCGGGCAGTGAGCGCAA**  
CGCAATTAATGTGAGTTAGCTCACTCATTAGGCACCCAGGCTTTACACTTTATGCTTCCGGCTCGTAT  
GTTGTGTGGAATTGTGAGCGGATAACAATTTACACACAGGAAACAGCTATGACCATGATTACGCCAAGCT  
TGCATCATCATCATCATGTAGACAACAAATTAACAACAAAGAACAAACAAACCGCTTCTATGAGATCT  
TACATTTACCTAACTTAAACGAAGAACAACGAAACGCCTTCATCCAAAGTTTAAAAGATGACCCAAGCC  
AAAGCGCTAACTTGCTAGCAGAAGCTAAAAAGCTAAATGATGCTCAGGCGCCGAAACAGATCCAATCG  
ATCCCCGGGT**ACCGGTCCGCCACCGGTGGATCCGGT**

Insert 3: eGFP

**CGGGTACCGGTCCGCCACCGGTGGATCCGGTATGGTGAGCAAGGGCGAGGAGCTGTTACCGGGGTGGT**  
GCCCATCCTGGTGCAGCTGGACGGCGACGTAACCGGCCACAAGTTACGCGTGTCCGGCGAGGGCGAGGG  
CGATGCCACCTACGGCAAGCTGACCCTGAAGTTTCTGCAACCACCGCAAGCTGCCCGTGGCCTGGCC  
ACCCTCGTGACCACCCTGACCTACGGCGTGCAGTGCTTACGCCGCTACCCCGACCACATGAAGCAGCAG  
ACTTCTTCAAGTCCGCCATGCCCCAAGGCTACGTCCAGGAGCGCACCATCTTCTTCAAGGACGACGGCA  
ACTACAAGACCCGCGCCGAGGTGAAGTTTCGAGGGCGACACCCTGGTGAACCGCATCGAGCTGAAGGGCA  
TCGACTTCAAGGAGGACGGCAACATCCTGGGGCACAAGCTGGAGTACAACACTACAACAGCCACAACGCTCT  
ATATCATGGCCGACAAGCAGAAGAAGCGCATCAAGGTGAACCTCAAGATCCGCCACAACATCGAGGACG  
GCAGCGTGCAGCTCGCCGACCACTACCAGCAGAACACCCCATCGGCGACGGCCCCGTGCTGCTGCCCGA  
CAACCACTACCTGAGCACCCAGTCCGCCCTGAGCAAAGACCCCAACGAGAAGCGCGATCACATGGTCCT  
GCTGGAGTTCGTGACCGCCCGGGATCACTCT**CGGCATGGACGAGCTGTACAAGGCGGCCGACGAC**  
**TC**

Restriction enzyme for bead release: NotI

## **pHisZKm**

Same as pHisZamp except backbone exchanged for:

Backbone:

***CTCGAGGCGGCCGATAAGGTCTGACGCTCAGTGGAAACGAAAACCTCACGTTAAGGGATTTTGGTCATG  
AACAAATAAACTGTCTGCTTACATAAACAGTAATAACAAGGGGTGTTATGAGCCATATTTCAACGGGAAA  
CGTCTTGCTCTAGGCCGCGATTAATTTCCAACATGGATGCTGATTTATATGGGTATAAATGGGCTCGCG  
ATAATGTCGGGCAATCAGGTGCGACAATCTATCGATTGTATGGGAAGCCCGATGCGCCAGAGTTGTTTC  
TGAAACATGGCAAAGGTAGCGTTGCCAATGATGTTACAGATGAGATGGTCAGACTAACTGGCTGACG  
GAATTTATGCCTCTTCCGACCATCAAGCATTTTATCCGTA CTCTGATGATGCATGGTTACTCACCCT  
GCGATCCCCGGGAAAACAGCATTCCAGGTATTAGAAGAATATCCTGATTCAGGTGAAAATATTGTTGA  
TGCGCTGGCAGTGTTCTGCGCCGGTTGCATTGATTCTGTTTGTAAATTGTCCTTTTAAACAGCGATCG  
CGTATTTCTGCTCTCGCTCAGGCGCAATCACGAATGAATAACGGTTTGGTTGATGCGAGTGATTTTGATGA  
CGAGCGTAATGGCTGGCCTGTTGAACAAGTCTGGAAAAGAAATGCATAAACTTTTGCCATTCTCACCAGGA  
TTCAGTCTGCTCACTCATGGTGATTTCTCACTTGATAACCTTATTTTTGACGAGGGGAAAATTAATAGGTTG  
TATTGATGTTGGACGAGTCGGAATCGCAGACCGATACCAGGATCTTGCCATCCTATGGAACGCTCGG  
TGAGTTTTCTCCTTATTACAGAAAACGGCTTTTTCAAAAAATATGGTATTGATAATCCTGATATGAATAA  
ATTGCAGTTTCATTTGATGCTCGATGAGTTTTTCTAAGAATTAATTCATGAGCGGATACATATTTGAAT  
GTATTTAGAAAAATAAACAAATAGGGGTTCCGCGCACATTTCCCCGAAAAGTGCCCTTAACTGAGTT  
TTCGTTCCACTGAGCG***

Restriction enzyme for bead release: NotI

## **pAFF8C**

Backbone: Origin of replication

***CTCGAGGCGGCCGCAAGCTTGTGCGACGGAGCTCGAATTCGGATCCATGTAGTGAGCGAAGGTACCAGG  
TAATGCAGCTAAAATTTTCATCTATCAGTGCTTTTACACCTTCAACAGTTTTTGGCATTGTTGATTAGGTT  
CTTGTAATAGTCACTTACTCCATATTTGTCAAGTCTCTGTTAGCTAAGACTTTAGCTTCAGCTAATTC  
AATTGATTTAACAGTATCTTCAGCAGGTGTTTGTGATTTCAAGAAATCAGATAAGCCATCTGTTGCTTC  
TGAAATACGCGCTTTCTTCGCTGATTCAACAACCTTGTGCTTGAAGGTCTTTTACACCTTCAACAGTTTT  
GGCATTGTTGATTAGGTTCTTGTGATAGTCACTTACTCCATATTTGTCAAGTCTCTGTTAGCTAAGAC  
TTTAGCTTCAGCTAAGCTAGCCATATGGCTGCCGCGCGCACACCAGGCCGCTGCTGTGATGATGATGAT  
ATGGCTCACTGCCCATTGGTATATCTCCTTCTTAAAGTTAAACAAAATTAATTTCTAGAGGGGAATGTTAT  
CCGCTCACAAATCCCCCTATAGTGAGTCGTATTAATTTCCGCGGATCGAGATCTCGATCTCAGGCCG  
ACGCATCGTGGCCGCGCATCACCGGCCACAGGTGCGGTTGCTGGCGCCTATATCGCCGACATCACCGAT  
GGGGAAGATCGGGCTCGCCACTTCGGGCTCATGAGCGCTTGTTCGGCGTGTTGTTGTTGTTGTTGTTGTTG  
GTGGCCGGGGGACTGTTGGGCGCCATCTCCTTGATGCACCATTCTTGGCGCGCGGTTGCTCAACGGCC  
TCAACCTACTACTGGGCTGCTTCCCTAATGCAGGAGTCGCATAAAGGGAGAGCGTCGAGATCCCGGACACC  
ATCGAATGGCGCAAAACCTTTTCGCGGTATGGCATGATAGCGCCGGAAGAGAGTCAATTCAGGGTGGTG  
AATGTGAAACCAGTAACGTTATACGATGTGCGAGAGTATGCCGGTGTCTCTTATCAGACCGTTTCCCGC  
GTGGTGAACCAGGCCAGCCAGCTTTCTGCGAAAACCGGGAAAAAGTGAAGCGGCGATGGCGGAGCTG  
AATTACATTTCCAACCGCTGGCACAACAACCTGGCGGGCAAAACAGTCGTTGCTGATTGGCGTTGCCACC  
TCCAGTCTGGCCCTGCACGCGCCGTCGCAATTTGTCGCGCGGATTAATCTCGCGCCGATCAACTGGGT  
GCCAGCGTGGTGGTGTGATGGTAGAACGAAGCGGCTCGAAGCCTGTAAAGCGGCGGTGCACAATCTT  
CTCGCGCAACGCGTCAGTGGGCTGATCATTAACCTATCCGCTGGATGACCAGGATGCCATTGCTGTGGAA  
GCTGCCTGCACTAATGTTCCGGCGTTATTTCTTGTGATGCTCTGACCAGACACCCATCAACAGTATTATT  
TTCTCCCATGAAGACGGTACGCGACTGGGCGTGGAGCATCTGGTGCATTGGGTACCAGCAAATCGCG  
CTGTTAGCGGGCCATTAAGTTCTGTCTCGGCGCTGCTGCGTCTGGCTGGCTGGCATAAATATCTCACT  
CGCAATCAAATTCAGCCGATAGCGGAACGGGAAGGCGACTGGAGTGCCATGTCCGGTTTTCAACAAACC  
ATGCAAATGCTGAATGAGGGCATCGTTCCACTGCGATGCTGGTTGCCAACGATCAGATGGCGCTGGGC  
GCAATGCGCGCCATTACCGAGTCCGGGCTGCGCGTTGGTGGCGATATCTCGGTAGTGGGATACGACGAT  
ACCGAAGACAGCTCATGTTATATCCCGCGTTAACCACCATCAAACAGGATTTTTCGCTGCTGGGGCAA  
ACCAGCGTGGACCGCTTGTGCAACTCTCTCAGGGCCAGGCGGTGAAGGGCAATCAGCTGTTGCCCGTC  
TCACTGGTGAAGAAAAAACCACCTGGCGCCAATACGCAAACCGCCTCTCCCCGCGGTTGGCCGAT  
TCATTAATGCAGCTGGCAGCAGAGGTTTCCCGACTGGAAAGCGGGCAGTGAGCGCAACGCAATTAATGT  
AAGTTAGCTCACTCATTAGGCACCGGGATCTCGACCGATGCCCTTGAGAGCCTTCAACCCAGTCAGCTC  
CTTCCGGTGGGCGCGGGCATGACTATCGTCCGCGCACTTATGACTGTCTTCTTTATCATGCAACTCGT  
AGGACAGGTGCCGGCAGCGCTCTGGGTCATTTTTCGGCGAGGACCGCTTTCGCTGGAGCGCGACGATGAT  
CGGCTGTGCTTGGCGTATTCCGAATCTTGACGCGCCTCGCTCAAGCCTTCGTCACTGGTCCCGCCACC***

AAACGTTTCGGCGAGAAGCAGGCCATTATCGCCGGCATGGCGGCCACGGGTGCGCATGATCGTGCTC  
CTGTGCTTGAGGACCCGGCTAGGCTGGCGGGTTGCCCTACTGGTTAGCAGAATGAATCACCGATACGC  
GAGCGAACGTGAAGCGACTGCTGCTGCAAAACGCTGCGACCTGAGCAACAACATGAATGGTCTTCGGT  
TTCCGTGTTTTCGTAAAGTCTGGAAACGCGGAAGTCAGCGCCTGCACCATTATGTTCCGGATCTGCATC  
GCAGGATGCTGCTGGCTACCCTGTGGAACACCTACATCTGTATTAACGAAGCGCTGGCATTGACCCTGA  
GTGATTTTTCTCTGGTCCC GCCGCATCCATACCGCCAGTTGTTTACCCTACAACGTTCCAGTAACGGG  
CATGTTTCATCATCAGTAACCCGTATCGTGAGCATCCTCTCTCGTTTCATCGGTATCATTACCCCATGAA  
CAGAAATCCCCCTTACACGGAGGCATCAGTGACCAAACAGGAAAAAACCGCCCTTAACATGGCCCGCTT  
TATCAGAAGCCAGACATTAACGCTTCTGGAGAACTCAACGAGCTGGACGCGGATGAACAGGCAGACAT  
CTGTGAATCGCTTACAGACCAGCTGATGAGCTTTACCGCAGCTGCCTCGCGCTTTCGGTGATGACGG  
TGAAAACTCTGACACATGCAGCTCCCGGAGACGGTACAGCTTGTCTGTAAGCGGATGCCGGGAGCAG  
ACAAGCCCGTCAGGGCGCGTCAGCGGGTGTGGCGGGTGTGGGGGCGCAGCCATGACCCAGTCACGTAG  
CGATAGCGGAGTGATACTGGCTTAACTATGCGGCATCAGAGCAGATTGTAAGTACTGAGAGTGACCATATA  
TGCGGTGTGAAATACCGCACAGATGCGTAAGGAGAAAAATACCGCATCAGGCGCTCTTCCGCTTCTCGC  
TCACTGACTCGCTGCGCTCGGTGCTTCCGCTGCGGCGAGCGGTATCAGCTCAAGGGCGGTAATAC  
GGTTATCCACAGAATCAGGGGATAACGCAGGAAAGAACATGTGAGCAAAAGGCCAGCAAAAGGCCAGG  
AACCGTAAAAAGGCCGCTTGGTGGCGTTTTTCCATAGGCTCCGCCCCCTGACGAGCATCACAAAAAT  
CGACGCTCAAGTCAGAGGTGGCGAAACCGACAGGACTATAAAGATACCAGGCGTTTTCCCTTGGAAAGC  
TCCCTCGTGCCTCTCTGTTCCGACCTGCCGCTTACCGGATACCTGTCCGCTTCTCCCTTCCGGAA  
GCGTGGCGCTTCTCATAGCTCACGCTGTAGGTATCTCAGTTCGGTGTAGGTGCTTCCGCTCCAAGCTGG  
GCTGTGTGCACGAACCCCGTTCAGCCCGACCGCTGCGCCTTATCCGGTAACTATCGTCTTGAGTCCAA  
CCCGGTAAGACACGACTTATCGCCACTGGCAGCAGCCACTGGTAACAGGATTAGCAGAGCGAGGTATGT  
AGGCGGTGCTACAGAGTCTTGAAGTGGTGGCTAACTACGGCTACACTAGAAGGACAGTATTTGGTAT  
CTGCGCTCTGCTGAAGCCAGTTACCTTCGAAAAAGAGTTGGTAGCTCTTGATCCGGCAAAACAAACCAC  
CGTGGTAGCGGTGGTTTTTTTTGTTTGAAGCAGCAGATTACGCGCAGAAAAAAAGGATCTCAAGAAG  
ATCCTTTGATCTTTTCTACGGGTCTGACGCTCAGTGGAAACGAAAACTCACGTTAAGGGATTTTGGTCA  
TGAACAATAAACTGTCTGCTTACATAAACAGTAATAACAAGGGGTGTTATGAGCATATTTCCGGGA  
AACGCTTTGCTCTAGGCCGCGATTAATTC AACATGGATGCTGATTTATATGGGTATAAATGGGCTCG  
CGATAATGTCCGGCAATCAGGTGCGACAATCTATCGATTGTATGGGAAGCCCGATGCGCCAGAGTTGTT  
TCTGAAACATGGCAAAGGTAGCGTTGCCAATGATGTTACAGATGAGATGGTCAGACTAACTGGCTGA  
CGGAATTTATGCCTCTTCCGACCATCAAGCATTATCCGTAATCCTGATGATGCATGGTTACTCACCA  
CTGCGATCCCGGGAAAAACAGCATTCCAGGTATTAGAAGATATCCTGATTCAGGTGAAAAATATTGTTG  
ATGCGCTGGCAGTGTTTCTGCGCCGGTTGCATTTCGATTCTGTTTGTAAATTGTCCTTTTAAACAGCGATC  
GCGTATTTTCGTCTCGCTCAGGCGCAATCACGAATGAATAACGGTTTGGTTGATGCGAGTGATTTTGATG  
ACGAGCGTAATGGCTGGCTGTTGAACAAGTCTGGAAAGAAATGCATAAACTTTTGCCATTCTCACCGG  
ATTCAGTCGTCATCATGGTGATTTCTCACTTGATAACCTTATTTTTGACGAGGGGAAATTAATAGGTT  
GTATTGATGTTGGACGAGTCGGAATCGCAGACCGATACCAGGATCTTGCCATCCTATGGAACGCTCG  
GTGAGTTTTCTCCTTATTACAGAAACGGCTTTTTCAAAAATATGGTATTGATAATCCTGATATGAATA  
AATTGCAGTTTTCATTTGATGCTCGATGAGTTTTTCTAAGAAATTAATTCATGAGCGGATACATATTTGA  
ATGTATTTAGAAAAATAAACAAATAGGGGTTCCGCGCACATTTCCCGAAAAGTGCCACCTGAAATTTG  
AAACGTTAATATTTTGTAAAAATTCGCGTTAAATTTTTGTTAAATCAGCTCATTTTTTAAACCAATAGGC  
CGAAATCGGCAAAATCCCTTATAAATCAAAAAGAAATAGACCGAGATAGGGTTGAGTGTGTTCCAGTTT  
GGAACAAGAGTCCACTATTAAGAACGTGGACTCCAACGTCAAAGGGCGAAAAACCGTCTATCAGGGCG  
ATGGCCACTACGTGAACCATCACCTAATCAAGTTTTTTGGGGTCGAGGTGCCGTAAAGCACTAAATC  
GGAACCTAAAGGGAGCCCCGATTTAGAGCTTGACGGGGAAAGCCGGCGAACGTGGCGAGAAAGGAA  
GGGAAGAAAGCGAAAGGAGCGGGCGCTAGGGCGCTGGCAAGTGTAGCGGTCACGCTGCGCGTAACCACC  
ACACCCGCGCGCTTAATGCGCCGCTACAGGGCGCGTCCCATTCGCAATCCGGATATAGTTCTCTCTTT  
CAGCAAAAAACCCCTCAAGACCCGTTTAGAGGCCCAAGGGTTATGCTAGTTATTGCTCAGCGGTGGG  
GCGCGCTTATTTAAGATTATTGGTCACTTGTTCAGCAAGATGCATTTCTCTGTATGAGGGACCAAGA  
GACAGATCATGTTCCGGAGGGGGTCTGGTGCTCAACGTTTCACTTCTGGGCTTCTGGAGTTCCCTGAGCA  
ATCTGGTGGTCTCATCAAGTTTTCTTCTGGAATATTTTCAAGCTTCTTCAAGTCAAAAACTTCAACTGGAA  
CGCAAAAATTTGTTACTGCTTTCAGCGCTATGAGCCTGTCTTGTGACTGGAGTCCAAACGCCCTGGTG  
**GCTCTGCGGCCGCACGACTC**

Insert 1: Km resistance

**GGTCTGACGCTCAGTGGAAACGAAAACTCACGTTAAGGGATTTTGGTTCATGAACAATAAACTGTCTGC**  
TTACATAAACAGTAATACAAGGGGTGTTATGAGCCATATTC AACGGGAAACGTTGCTCTAGGCCGCG  
ATTAATTC AACATGGATGCTGATTTATATGGGTATAAATGGGCTCGCGATAATGTCCGGCAATCAG

GTGCGACAATCTATCGATTGTATGGGAAGCCCGATGCGCCAGAGTTGTTTCTGAAACATGGCAAAGGTA  
GCGTTGCCAATGATGTTACAGATGAGATGGTCAGACTAAACTGGCTGACGGAATTTATGCCTCTCCGA  
CCATCAAGCATTATCCGTACTCCTGATGATGCATGGTTACTCACCCTGCGATCCCCGGGAAAACAG  
CATTCCAGGTATTAGAAGAATATCCTGATTCAGGTGAAAATATTGTTGATGCGCTGGCAGTGTTCCTGC  
GCCGTTGCATTTCGATTCCTGTTTGTAAATTGTCCTTTTAAACAGCGATCGCGTATTTTCGTCTCGCTCAGG  
CGCAATCACGAATGAATAACGGTTTGGTTGATGCGAGTGATTTTGTGATGACGAGCGTAATGGCTGGCCTG  
TTGAACAAGTCTGGAAAGAAATGCATAAACTTTTGCCATTCTCACCGGATTCAGTCGTCACCTCATGGTG  
ATTTCTCACTTGATAACCTTATTTTTGACGAGGGGAAATTAATAGGTTGTATTGATGTTGGACGAGTC  
GGAATCGCAGACCGATACCAGGATCTTGCCATCCTATGGAAGTGCCTCGGTGAGTTTTCTCCTTCATTA  
CAGAAACGGCTTTTTCAAAAATATGGTATTGATAATCCTGATATGAATAAATTGCAGTTTCATTTGAT  
GCTCGATGAGTTTTTCTAAGAATTAATTCATGAGCGGATACATATTTGAATGTATTTAGAAAAATAAA  
CAAATAGGGTTCCGCGCACATTTCCCGAAAAGTGC

Insert 2: f1 ori

**GGGTTCCGCGCACATTTCCCGAAAAGTGCCACCTGAAATTGTAAACGTTAATATTTTTGTAAAATTC**  
GCGTTAAATTTTTGTAAAATCAGCTCATTTTTTAACCAATAGGCCGAAAATCCCTTATAAA  
TCAAAAGAATAGACCGAGATAGGGTTGAGTGTGTTCCAGTTTGGAAACAAGAGTCCACTATTAAGAA  
CGTGGACTCCAACGTCAAAGGGCGAAAAACCGTCTATCAGGGCGATGGCCCACTACGTGAACCATCACC  
CTAATCAAGTTTTTTGGGGTCGAGGTGCCGTAAAGCACTAAATCGGAACCCTAAAGGGAGCCCCGATT  
TAGAGCTTGACGGGAAAAGCCGGCGAACGTGGCGAGAAAGGAAGGAAGAAAGCGAAAGGAGCGGGCG  
CTAGGGCGCTGGCAAGTGTAGCGGTACGCTGCGCGTAACCACCACCCGCGCGCTTAATGCGCCGCT  
ACAGGGCGCGTCCCATTCGCAAT**CCGGATATAGTTCCTCCTTTCA**

Insert 3: PrEST 2250323

**TCGCCAATCCGGATATAGTTCCTCCTTTAGCAAAAAACCCCTCAAGACCCGTTTAGAGGCCCAAGG**  
GGTTATGCTAGTTATTGCTCAGCGGTGGGGCGCGCCTTATTTAAGATTATTGGTCACTTGTTCAGCAAG  
ATGCATTTCTCTGTATGAGGGACCCAAGAGACAGATCATGTTCCGAGGGGGTCTGGTGCTCAAACGTTT  
ATTCTGGGCTTCTGGAGTTCCTGAGCAATCTGGTGGTCTCATCAAGTTTCTTCTGGAATATTTTCAGC  
TTCTTCAGAGTCAAAAACTTCAACTGGAACGCCAAAATTTGTTACTGCTTTCAGCGCTATGAGCCTGTC  
TTGAGTACTGGAGTCCAAACGCCCTGGTGGCTCTGCGGCCGC**ACGACTC**
